# Supplementary material
Source: HighWire-hosted journal article supplement (https://gut.bmj.com/content/67/5/805)

### Supplemental Figure 1. Method for isolating F4/80 positive cells from acute SPEM models.

**models. A.** Wild-type C57BL/6 mice (n=3 per sample, 3 biological replicate samples) were treated with L635 for 3 days or DMP-777 for 10 days, and were sacrificed on the last day of treatment. The corpus was removed from the stomach and enzymatically digested into a single cell suspension. Macrophages were labeled using the antibody F4/80 and FACS sorted for RNA sequencing, n=3 replicates/each sample. **B.** Immunofluorescence staining of representative images illustrating the F4/80 positive macrophages sorted from DMP-777 and L635-treated mice. Scale bars 100  $\mu$ m. **C.** Representative dot plot images of the FACS sorted PE-F4/80 cell population in DMP-777 and L635-treated mice. Macrophages sorted from DMP-777 made up 4.41% ( $\pm$ 0.21) of cells, while macrophages sorted from L635-treated mice was 8.64% ( $\pm$ 0.31).

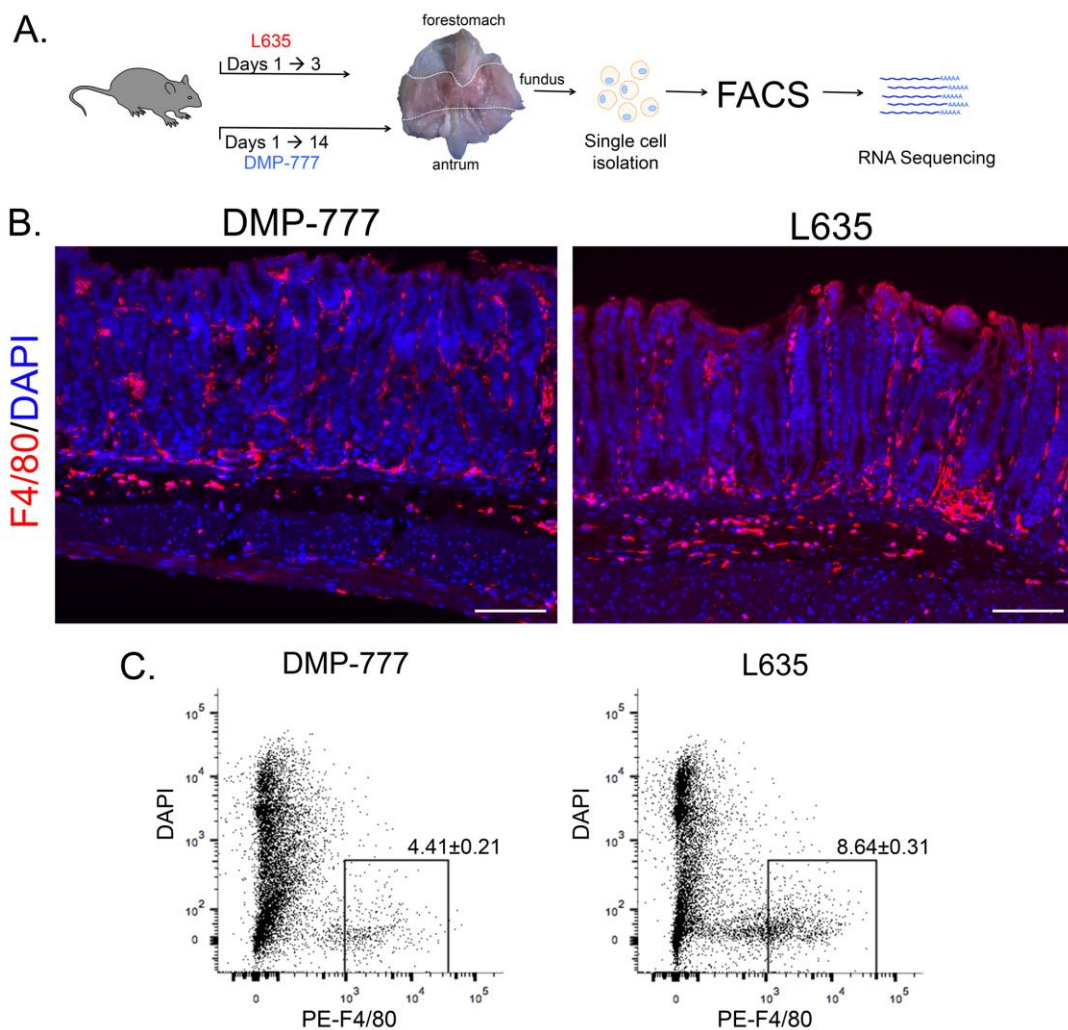

**Supplemental Figure 2. IL-33 is upregulated after L635 treatment or *H. felis* infection**

**and is expressed in macrophages. A.** Immunofluorescence staining for IL-33 (green) and the macrophage marker F4/80 (red) with DAPI (blue) in wild type mice. IL-33 is expressed in nuclei of surface mucus epithelial cells in the normal stomach corpus. After parietal cell loss following L635 treatment, nuclear IL-33 expands in accordance with foveolar hyperplasia and is also expressed in macrophages. **B.** Immunofluorescence staining for IL-33 (green) and the macrophage marker F4/80 (red) with DAPI (blue) in IL33KO mice. No IL-33 staining is observed in either mucosal cells or macrophages in IL33KO mice. Higher magnification insets are shown in upper right. C. Western blot for IL-33 protein and  $\alpha$ -tubulin control demonstrates elevation of IL-33 expression in the corpus mucosa after L635 treatment and *H. felis* infection. D. Immunofluorescence staining for IL-33 (green) and the macrophage marker F4/80 (red) with DAPI (blue) in the corpus of a wild type mouse infected with *H. felis* for 6 months. IL-33 was expressed in foveolar cells as well as in macrophages (see inset at right). Scale bar = 100  $\mu$ m.

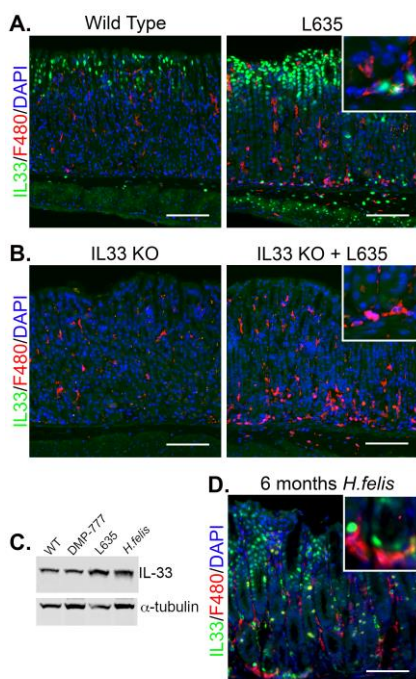

**Supplemental Figure 3. Ym1 expression is lost in L635-treated IL-33, ST2 and IL-13 deficient mice.** Relative expression of Ym1 transcripts using quantitative PCR. Results are normalized to the expression of GAPDH and relative expression of Ym1 for each mouse model is shown compared to wild-type L635. In each of the untreated mouse models tested, there was no detectable expression of Ym1 transcript (data not shown).

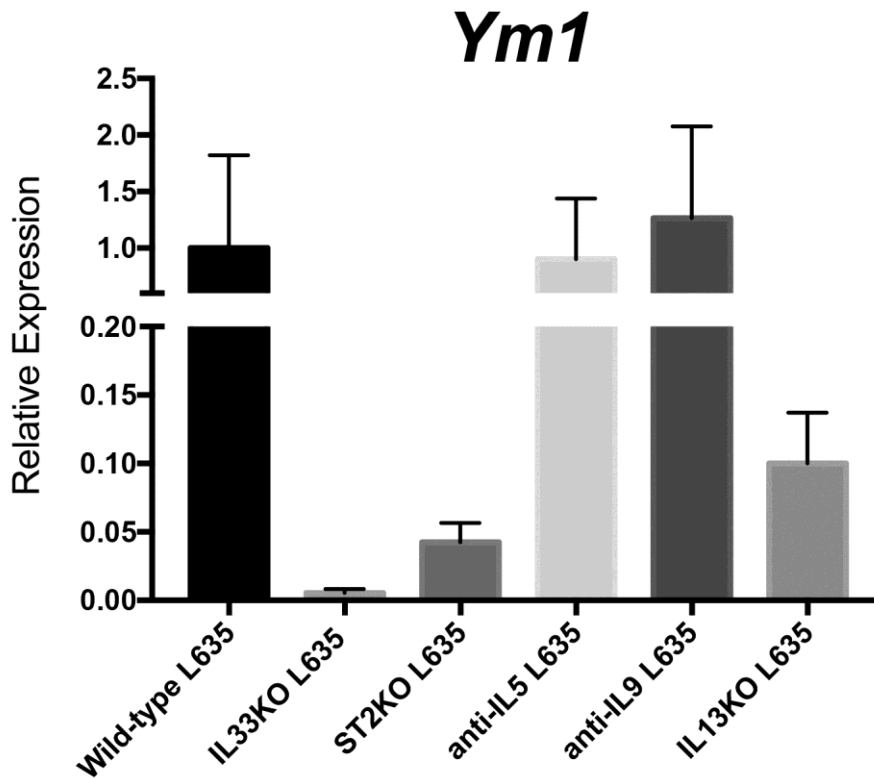

**Supplemental Figure 4. Eosinophil infiltration into the stomach after acute parietal cell loss is dependent on macrophages and IL-5.** **A.** Eosinophil specific Major Basic Protein IHC of wild-type untreated, DMP-777-treated, and L635-treated mice to visualize eosinophil granules. Wild-type untreated mice have a few eosinophils within the mucosa, which increases after acute parietal cell loss in DMP-777 and L635-treated mice. **B.** H&E and Major Basic Protein IHC of L635-treated and L635-treated macrophage-depleted (clodronate-treated) mice. Parietal cell loss can be visualized after L635-treatment in both models. After L635 treatment, increased eosinophils are observed within the mucosa. There is less eosinophil infiltration into the mucosa in L635-treated macrophage-depleted mice

compared to wild-type L635-treated mice. **C.** Wild-type mice were treated with two IP injections of anti-IL-5 prior to and one dose during the three days of L635 treatment to prevent eosinophil activation and trafficking into the mucosa. H&E and Major Basic Protein IHC of control anti-IL-5-treated mice and anti-IL-5 with L635-treated mice were compared. Anti-IL-5 treatment did not impact the stomach of wild-type mice or impact the effectiveness of L635 treatment to cause parietal cell loss. Eosinophil infiltration was not observed in the mucosa in anti-IL-5 and L635-treated mice. Scale bars = 100  $\mu$ m.

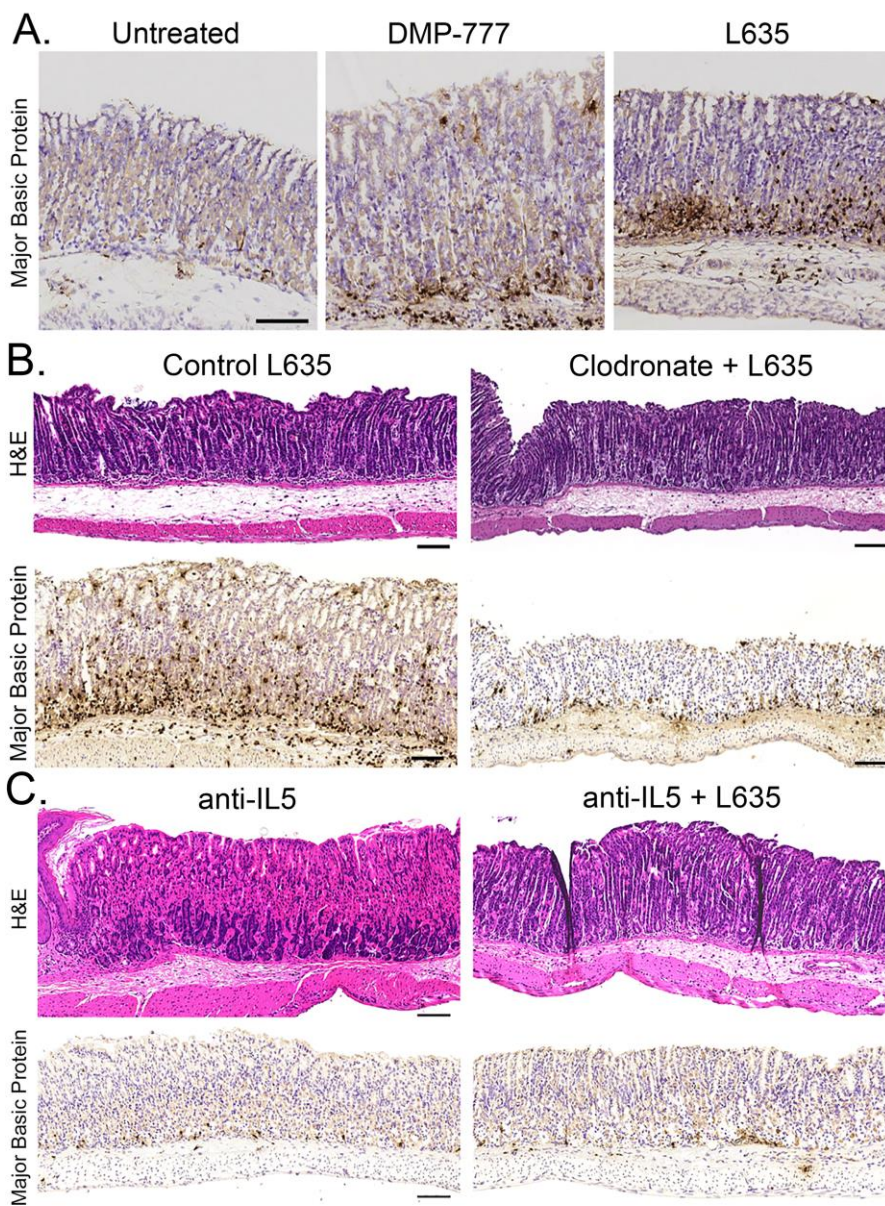



**Supplemental Figure 5. Expression of IL-13 $\alpha$ 1 receptor in the mouse gastric corpus mucosa.** Immunofluorescence staining was performed in sections of mouse corpus with antibodies against IL-13 $\alpha$ 1 receptor (red) and chief cell granule marker GIF (green) along with nuclear staining with DAPI (blue). Higher magnification inset is shown at right. Scale bars = 100  $\mu$ m.

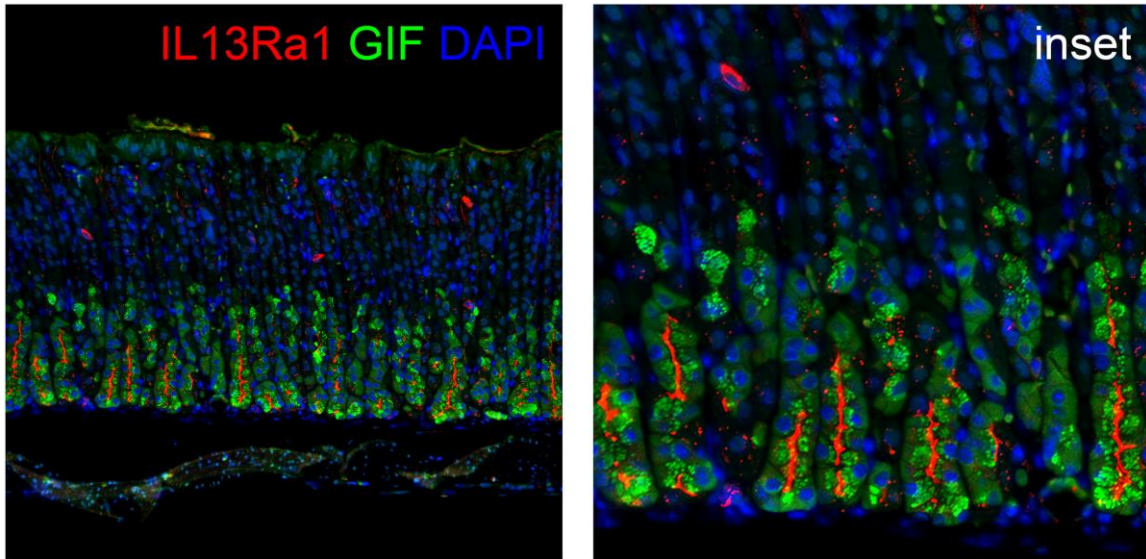

Supplement: inline-supplementary-material-1 [file inline-supplementary-material-1.pdf]
