# Supplementary material
Source: HighWire-hosted journal article supplement (https://gut.bmj.com/content/67/5/805)
Supplement: inline-supplementary-material-2 [file inline-supplementary-material-2.pdf]

| Gene Symbol                                                     | Chromosome | Start     | End       | Gene ID           | FC 2X DMP vs L635 | Log FC 2X DMP vs L635 |
|-----------------------------------------------------------------|------------|-----------|-----------|-------------------|-------------------|-----------------------|
| Serpinb2                                                        | chr1       | 107511423 | 107535478 | ENSMUSG0000062345 | -14.454231        | -3.85342              |
| Pde4b                                                           | chr4       | 102087543 | 102607259 | ENSMUSG0000028525 | -8.322698         | -3.0570512            |
| Ear11                                                           | chr14      | 51255266  | 51256112  | ENSMUSG0000047222 | -7.8086977        | -2.965082             |
| 1190002H23Rik=RGCC                                              | chr14      | 79288756  | 79301645  | ENSMUSG0000022018 | -7.5721445        | -2.920702             |
| Pydc3                                                           | chr1       | 173673911 | 173698392 | ENSMUSG0000066677 | -7.3933654        | -2.8862312            |
| Pydc4                                                           | chr1       | 173566284 | 173599274 | ENSMUSG0000073491 | -7.0913982        | -2.82607              |
| 9830107B12Rik+triggering receptor expressed in myeloid cells 5? | chr17      | 48125605  | 48146307  | ENSMUSG0000073386 | -7.008905         | -2.809189             |
| Il33                                                            | chr19      | 29925114  | 29960718  | ENSMUSG0000024810 | -6.7439237        | -2.7535882            |
| Prg2                                                            | chr2       | 84980461  | 84983632  | ENSMUSG0000027073 | -6.5518003        | -2.7118914            |
| Ccr3                                                            | chr9       | 124021971 | 124031689 | ENSMUSG0000035448 | -6.409836         | -2.6802874            |
| Bex4                                                            | chrX       | 136138996 | 136140443 | ENSMUSG0000047844 | -6.1098304        | -2.6111324            |
| Ear6                                                            | chr14      | 51853699  | 51854643  | ENSMUSG0000062148 | -6.033143         | -2.5929098            |
| Gm4955                                                          | chr1       | 173468509 | 173491041 | ENSMUSG0000037849 | -5.802624         | -2.5367055            |
| Mmp25                                                           | chr17      | 23629458  | 23645269  | ENSMUSG0000023903 | -5.7701364        | -2.5286055            |
| Ldhc                                                            | chr7       | 46861203  | 46878142  | ENSMUSG0000030851 | -5.7371483        | -2.5203338            |
| Sema7a                                                          | chr9       | 57940113  | 57962864  | ENSMUSG0000038264 | -5.3174715        | -2.4107404            |
| Fabp4                                                           | chr3       | 10204347  | 10208576  | ENSMUSG0000062515 | -5.2353644        | -2.38829              |
| Pyhin1                                                          | chr1       | 173630859 | 173647928 | ENSMUSG0000043263 | -5.22019          | -2.3841023            |
| Gcnt2                                                           | chr13      | 40859768  | 40960891  | ENSMUSG0000021360 | -5.175191         | -2.371612             |
| Genpe                                                           | chr3       | 135212563 | 135273540 | ENSMUSG0000045328 | -5.13514          | -2.3604035            |
| SYNE1                                                           | chr10      | 5336949   | 5550692   | ENSMUSG0000096054 | -4.9409914        | -2.3048005            |
| Cass4                                                           | chr2       | 172393794 | 172433757 | ENSMUSG0000074570 | -4.883419         | -2.2878916            |
| Ikzf3                                                           | chr11      | 98464902  | 98546031  | ENSMUSG0000018168 | -4.851289         | -2.278368             |
| Rwdd2a                                                          | chr9       | 86572053  | 86574896  | ENSMUSG0000032417 | -4.834833         | -2.273466             |
| Ifit2                                                           | chr19      | 34550694  | 34576419  | ENSMUSG0000045932 | -4.8237214        | -2.2701466            |
| Ptgs2                                                           | chr1       | 150100124 | 150108010 | ENSMUSG0000032487 | -4.8210645        | -2.2693517            |
| AC238811.3                                                      | chr13      | 120034759 | 120035331 | ENSMUSG0000095609 | -4.752349         | -2.2486408            |
| H2-T24                                                          | chr17      | 36005695  | 36020560  | ENSMUSG0000053835 | -4.7152843        | -2.2373447            |

|             |       |           |           |                        |            |            |
|-------------|-------|-----------|-----------|------------------------|------------|------------|
| Cd300lf     | chr11 | 115116214 | 115133992 | ENSMUSG00<br>000047798 | -4.676355  | -2.2253845 |
| Dach1       | chr14 | 97786853  | 98169765  | ENSMUSG00<br>000055639 | -4.6195793 | -2.2077615 |
| Mmp9        | chr2  | 164940780 | 164955850 | ENSMUSG00<br>000017737 | -4.582798  | -2.1962287 |
| C1rl        | chr6  | 124493113 | 124510643 | ENSMUSG00<br>000038527 | -4.5800333 | -2.195358  |
| Gm1966      | chr7  | 106601243 | 106604035 | ENSMUSG00<br>000073902 | -4.5290747 | -2.1792164 |
| Hist1h2ak   | chr13 | 21753395  | 21753907  | ENSMUSG00<br>000063021 | -4.5262504 | -2.1783164 |
| Trem12      | chr17 | 48300038  | 48312534  | ENSMUSG00<br>000071068 | -4.525294  | -2.1780114 |
| Slco4c1     | chr1  | 96818784  | 96872171  | ENSMUSG00<br>000040693 | -4.4442058 | -2.1519256 |
| Riad1       | chr3  | 94464985  | 94473591  | ENSMUSG00<br>000028139 | -4.419498  | -2.1438825 |
| Slfn8       | chr11 | 83002158  | 83020810  | ENSMUSG00<br>000035208 | -4.38581   | -2.1328433 |
| Fosb        | chr7  | 19302721  | 19310045  | ENSMUSG00<br>000003545 | -4.368961  | -2.1272902 |
| Pim1        | chr17 | 29490812  | 29495445  | ENSMUSG00<br>000024014 | -4.2968698 | -2.103286  |
| D16Ertd472e | chr16 | 78544012  | 78576657  | ENSMUSG00<br>000022864 | -4.2915926 | -2.1015131 |
| Dusp5       | chr19 | 53529109  | 53542431  | ENSMUSG00<br>000034765 | -4.2867904 | -2.0998979 |
| Ccrl2       | chr9  | 111054835 | 111057270 | ENSMUSG00<br>000043953 | -4.2605824 | -2.0910506 |
| Cd101       | chr3  | 100993530 | 101029556 | ENSMUSG00<br>000086564 | -4.2559285 | -2.089474  |
| Sell        | chr1  | 164062076 | 164080785 | ENSMUSG00<br>000026581 | -4.1914783 | -2.067459  |
| Gbp9        | chr5  | 105078394 | 105139539 | ENSMUSG00<br>000029298 | -4.1888385 | -2.0665503 |
| Smc2        | chr4  | 52439243  | 52488260  | ENSMUSG00<br>000028312 | -4.170129  | -2.060092  |
| Adrb2       | chr18 | 62177817  | 62179959  | ENSMUSG00<br>000045730 | -4.1695423 | -2.059889  |
| Gbp7        | chr3  | 142530338 | 142550083 | ENSMUSG00<br>000040253 | -4.152627  | -2.0540242 |
| Chia        | chr3  | 106113229 | 106132120 | ENSMUSG00<br>000062778 | -4.1135    | -2.0403664 |
| Wnt8a       | chr18 | 34542313  | 34548273  | ENSMUSG00<br>000012282 | -4.066634  | -2.0238352 |
| Kif15       | chr9  | 122951081 | 123018725 | ENSMUSG00<br>000036768 | -4.0527987 | -2.0189185 |
| Mtf2        | chr5  | 108065674 | 108109004 | ENSMUSG00<br>000029267 | -4.0509834 | -2.0182722 |
| Cxcr2       | chr1  | 74153989  | 74161238  | ENSMUSG00<br>000026180 | -4.049481  | -2.017737  |
| Rgs1        | chr1  | 144243972 | 144249242 | ENSMUSG00<br>000026358 | -4.0418468 | -2.0150146 |
| Chst15      | chr7  | 132235780 | 132317228 | ENSMUSG00<br>000030930 | -4.031761  | -2.0114102 |
| H60b        | chr10 | 22158586  | 22288849  | ENSMUSG00<br>000075297 | -3.9817977 | -1.9934199 |
| Setmar      | chr6  | 108065045 | 108077122 | ENSMUSG00              | -3.975228  | -1.9910376 |

|                |       |           |           |                        |            |            |
|----------------|-------|-----------|-----------|------------------------|------------|------------|
|                |       |           |           | 000034639              |            |            |
| Ndc80          | chr17 | 71496100  | 71526857  | ENSMUSG00<br>000024056 | -3.969827  | -1.9890761 |
| Gm14548        | chr7  | 3884242   | 3898120   | ENSMUSG00<br>000074417 | -3.9544997 | -1.9834952 |
| Ogfrl1         | chr1  | 23366424  | 23383175  | ENSMUSG00<br>000026158 | -3.9477577 | -1.9810334 |
| Lrrk2          | chr15 | 91673175  | 91816120  | ENSMUSG00<br>000036273 | -3.9307494 | -1.9748044 |
| Abtb2          | chr2  | 103566310 | 103718423 | ENSMUSG00<br>000032724 | -3.9255059 | -1.9728786 |
| Cd209f         | chr8  | 4102787   | 4105835   | ENSMUSG00<br>000051906 | -3.9173098 | -1.9698632 |
| Ccl24          | chr5  | 135569937 | 135573043 | ENSMUSG00<br>000004814 | -3.9129183 | -1.968245  |
| Phxr4          | chr9  | 13431361  | 13432736  | ENSMUSG00<br>000031802 | -3.9105036 | -1.9673544 |
| Prkar2b        | chr12 | 31958476  | 32061296  | ENSMUSG00<br>000002997 | -3.89563   | -1.9618566 |
| 3-Mar          | chr18 | 56761716  | 56925548  | ENSMUSG00<br>000032656 | -3.8955529 | -1.9618281 |
| G0s2           | chr1  | 193272161 | 193273188 | ENSMUSG00<br>000009633 | -3.8930724 | -1.9609091 |
| Gm340          | chr19 | 41582370  | 41586536  | ENSMUSG00<br>000090673 | -3.882908  | -1.9571376 |
| Sp140          | chr1  | 85600378  | 85645037  | ENSMUSG00<br>000070031 | -3.872787  | -1.9533721 |
| Gfod1          | chr13 | 43195519  | 43304172  | ENSMUSG00<br>000051335 | -3.864623  | -1.9503278 |
| Hist1h1a       | chr13 | 23763668  | 23764414  | ENSMUSG00<br>000049539 | -3.841424  | -1.9416412 |
| Pygl           | chr12 | 70190811  | 70231488  | ENSMUSG00<br>000021069 | -3.8308346 | -1.9376588 |
| Best1          | chr19 | 9985174   | 10001633  | ENSMUSG00<br>000037418 | -3.8298225 | -1.9372776 |
| Ahr            | chr12 | 35497974  | 35535038  | ENSMUSG00<br>000019256 | -3.7974129 | -1.9250169 |
| 5330426P16Rik  | chr16 | 50727966  | 50732743  | ENSMUSG00<br>000022639 | -3.7759187 | -1.9168277 |
| 9930111J21Rik1 | chr11 | 48946150  | 48979398  | ENSMUSG00<br>000069893 | -3.763802  | -1.9121908 |
| Il1r2          | chr1  | 40084768  | 40125219  | ENSMUSG00<br>000026073 | -3.7515643 | -1.9074923 |
| Tgm1           | chr14 | 55700009  | 55713492  | ENSMUSG00<br>000022218 | -3.7293532 | -1.8989254 |
| Meis1          | chr11 | 18880430  | 19018958  | ENSMUSG00<br>000020160 | -3.725689  | -1.8975072 |
| AI504432       | chr3  | 107039504 | 107051152 | ENSMUSG00<br>000056145 | -3.7184737 | -1.8947105 |
| Sfn5           | chr11 | 82951349  | 82962941  | ENSMUSG00<br>000054404 | -3.6996522 | -1.8873897 |
| Abcd2          | chr15 | 91145884  | 91191807  | ENSMUSG00<br>000055782 | -3.6744637 | -1.8775337 |
| Apobr          | chr7  | 126584942 | 126589112 | ENSMUSG00<br>000042759 | -3.6454012 | -1.8660777 |
| Zfp709         | chr8  | 71887264  | 71890912  | ENSMUSG00<br>000056019 | -3.640508  | -1.8641398 |
| Gm17511        | chr7  | 127286041 | 127286385 | ENSMUSG00<br>000090460 | -3.6303952 | -1.8601266 |

|           |       |           |           |                    |            |            |
|-----------|-------|-----------|-----------|--------------------|------------|------------|
| Sass6     | chr3  | 116595008 | 116630984 | ENSMUSG0000027959  | -3.607395  | -1.8509574 |
| Psme2b-ps | chr11 | 48945354  | 48946190  | ENSMUSG0000078153  | -3.6051934 | -1.8500767 |
| Itgb3     | chr11 | 104608000 | 104670476 | ENSMUSG0000020689  | -3.5553715 | -1.8300003 |
| Lyst      | chr13 | 13590409  | 13777440  | ENSMUSG0000019726  | -3.5518105 | -1.8285546 |
| Pde7b     | chr10 | 20398004  | 20725078  | ENSMUSG0000019990  | -3.5363626 | -1.8222662 |
| Chml      | chr1  | 175686488 | 175688353 | ENSMUSG0000078185  | -3.5329373 | -1.8208681 |
| Orm2      | chr4  | 63362449  | 63365878  | ENSMUSG00000061540 | -3.5325902 | -1.8207264 |
| Gapt      | chr13 | 110352615 | 110357172 | ENSMUSG0000046006  | -3.527861  | -1.8187938 |
| Gpr44     | chr19 | 10937160  | 10942511  | ENSMUSG00000034117 | -3.4813035 | -1.7996275 |
| Nme5      | chr18 | 34562634  | 34579115  | ENSMUSG00000035984 | -3.4718695 | -1.7957127 |
| Gm20696   | chr6  | 99257484  | 99666797  | ENSMUSG00000030068 | -3.471367  | -1.7955039 |
| Irg1      | chr14 | 103046977 | 103056573 | ENSMUSG00000022126 | -3.4675782 | -1.7939284 |
| Ppil4     | chr10 | 7792891   | 7823135   | ENSMUSG00000015757 | -3.4552448 | -1.788788  |
| Tmem14a   | chr1  | 21218575  | 21230167  | ENSMUSG00000025933 | -3.3953795 | -1.7635728 |
| Casp8ap2  | chr4  | 32615451  | 32653265  | ENSMUSG00000028282 | -3.3620074 | -1.7493229 |
| Adora3    | chr3  | 105870858 | 105924036 | ENSMUSG00000074344 | -3.3581343 | -1.7476599 |
| Acpp      | chr9  | 104288251 | 104337728 | ENSMUSG00000032561 | -3.3428407 | -1.7410746 |
| Mtrr      | chr13 | 68560780  | 68582121  | ENSMUSG00000034617 | -3.3199492 | -1.7311611 |
| Gm10097   | chr10 | 5069192   | 5071975   | ENSMUSG00000096553 | -3.3134077 | -1.7283157 |
| Card11    | chr5  | 140872999 | 141000596 | ENSMUSG00000036526 | -3.307915  | -1.7259221 |
| Hgf       | chr5  | 16553550  | 16619439  | ENSMUSG00000028864 | -3.2998927 | -1.7224191 |
| H2-Q6     | chr17 | 35424850  | 35430055  | ENSMUSG00000073409 | -3.291504  | -1.7187469 |
| Nlrp1b    | chr11 | 71153102  | 71230733  | ENSMUSG00000070390 | -3.2826695 | -1.7148695 |
| Itga4     | chr2  | 79255426  | 79333123  | ENSMUSG00000027009 | -3.2764816 | -1.7121475 |
| Gpr55     | chr1  | 85939537  | 85961055  | ENSMUSG00000049608 | -3.264204  | -1.7067312 |
| Haus3     | chr5  | 34153921  | 34169445  | ENSMUSG00000079555 | -3.2615464 | -1.7055562 |
| Zfp120    | chr2  | 150114406 | 150136708 | ENSMUSG00000068134 | -3.2506857 | -1.700744  |
| Mnda      | chr1  | 173896355 | 173912922 | ENSMUSG00000026536 | -3.2452242 | -1.6983181 |
| Adamdec1  | chr14 | 68563388  | 68582086  | ENSMUSG00000022057 | -3.2407703 | -1.6963367 |
| Runx2     | chr17 | 44495987  | 44814797  | ENSMUSG00          | -3.2356567 | -1.6940585 |

|               |       |           |           |                        |            |            |
|---------------|-------|-----------|-----------|------------------------|------------|------------|
|               |       |           |           | 000039153              |            |            |
| Cxcl2         | chr5  | 90903899  | 90905909  | ENSMUSG00<br>000058427 | -3.2341254 | -1.6933756 |
| Dennd4a       | chr9  | 64811340  | 64919667  | ENSMUSG00<br>000053641 | -3.23186   | -1.6923647 |
| Defb40        | chr8  | 18974940  | 18978256  | ENSMUSG00<br>000053678 | -3.2299361 | -1.6915057 |
| Alox15        | chr11 | 70344152  | 70352031  | ENSMUSG00<br>000018924 | -3.2278953 | -1.6905937 |
| Tnfsf14       | chr17 | 57189492  | 57194189  | ENSMUSG00<br>000005824 | -3.2252483 | -1.6894102 |
| Tiam2         | chr17 | 3326573   | 3519397   | ENSMUSG00<br>000023800 | -3.2205746 | -1.6873181 |
| AW011738      | chr4  | 156203304 | 156205151 | ENSMUSG00<br>000078349 | -3.2201576 | -1.6871313 |
| Klf7          | chr1  | 64029447  | 64122282  | ENSMUSG00<br>000025959 | -3.2199128 | -1.6870216 |
| Nlrp3         | chr11 | 59541568  | 59566956  | ENSMUSG00<br>000032691 | -3.2197132 | -1.6869322 |
| Trim30b       | chr7  | 104355382 | 104369884 | ENSMUSG00<br>000052749 | -3.2180586 | -1.6861906 |
| Atp10a        | chr7  | 58658202  | 58829426  | ENSMUSG00<br>000025324 | -3.2172134 | -1.6858116 |
| Nuf2          | chr1  | 169497934 | 169531464 | ENSMUSG00<br>000026683 | -3.2138526 | -1.6843038 |
| Csgalnact2    | chr6  | 118107452 | 118139140 | ENSMUSG00<br>000042042 | -3.211556  | -1.6832725 |
| Hells         | chr19 | 38930915  | 38971051  | ENSMUSG00<br>000025001 | -3.208337  | -1.6818258 |
| Trex2         | chrX  | 73433705  | 73435344  | ENSMUSG00<br>000031372 | -3.1988525 | -1.6775545 |
| Cd274         | chr19 | 29367455  | 29388095  | ENSMUSG00<br>000016496 | -3.198329  | -1.6773183 |
| Naip5         | chr13 | 100211739 | 100246323 | ENSMUSG00<br>000071203 | -3.1979802 | -1.677161  |
| B9d2          | chr7  | 25681158  | 25686558  | ENSMUSG00<br>000063439 | -3.1957707 | -1.6761639 |
| Dmxl2         | chr9  | 54365158  | 54501760  | ENSMUSG00<br>000041268 | -3.1762614 | -1.6673297 |
| Tctex1d4      | chr4  | 117126794 | 117128738 | ENSMUSG00<br>000047671 | -3.1674743 | -1.6633329 |
| Chd7          | chr4  | 8690406   | 8867659   | ENSMUSG00<br>000041235 | -3.157003  | -1.6585556 |
| Zfp953        | chr13 | 67317942  | 67360605  | ENSMUSG00<br>000056552 | -3.150806  | -1.655721  |
| Dek           | chr13 | 47084775  | 47106201  | ENSMUSG00<br>000021377 | -3.1453004 | -1.6531978 |
| Lrr1          | chr12 | 69168814  | 69179010  | ENSMUSG00<br>000034883 | -3.1380126 | -1.6498512 |
| Adpgk         | chr9  | 59291572  | 59316199  | ENSMUSG00<br>000025236 | -3.1371665 | -1.6494621 |
| Ccdc88b       | chr19 | 6844623   | 6858211   | ENSMUSG00<br>000047810 | -3.1367323 | -1.6492624 |
| Nod2          | chr8  | 88647315  | 88688474  | ENSMUSG00<br>000055994 | -3.1300411 | -1.6461816 |
| Trim27        | chr13 | 21179445  | 21194724  | ENSMUSG00<br>000021326 | -3.127616  | -1.6450634 |
| 4933407L21Rik | chr1  | 85928483  | 85940624  | ENSMUSG00<br>000026224 | -3.123262  | -1.6430535 |

|               |       |           |           |                        |            |            |
|---------------|-------|-----------|-----------|------------------------|------------|------------|
| Dlgap5        | chr14 | 47387779  | 47418407  | ENSMUSG00<br>000037544 | -3.1208715 | -1.6419489 |
| Pnn           | chr12 | 59066919  | 59074017  | ENSMUSG00<br>000020994 | -3.1207643 | -1.6418993 |
| Dnm1          | chr2  | 32308471  | 32353329  | ENSMUSG00<br>000026825 | -3.1109376 | -1.6373495 |
| L3mbtl3       | chr10 | 26274468  | 26375185  | ENSMUSG00<br>000039089 | -3.1067307 | -1.6353972 |
| Apba1         | chr19 | 23758876  | 23949597  | ENSMUSG00<br>000024897 | -3.0960188 | -1.6304142 |
| Zfp119a       | chr17 | 55865204  | 55878862  | ENSMUSG00<br>000057835 | -3.0944498 | -1.6296829 |
| Ipcef1        | chr10 | 6885796   | 7052478   | ENSMUSG00<br>000064065 | -3.0742328 | -1.6202264 |
| Prkcq         | chr2  | 11172113  | 11301226  | ENSMUSG00<br>000026778 | -3.0698493 | -1.6181678 |
| 1190002N15Rik | chr9  | 94517864  | 94538081  | ENSMUSG00<br>000045414 | -3.0695302 | -1.6180179 |
| Syne1         | chr10 | 5020203   | 5069063   | ENSMUSG00<br>000019769 | -3.0680456 | -1.61732   |
| Purg          | chr8  | 33386325  | 33417468  | ENSMUSG00<br>000049184 | -3.0675526 | -1.6170881 |
| Acap1         | chr11 | 69881567  | 69895539  | ENSMUSG00<br>000001588 | -3.0598273 | -1.6134503 |
| Arg1          | chr10 | 24915208  | 24927470  | ENSMUSG00<br>000019987 | -3.0591261 | -1.6131196 |
| Dtwd1         | chr2  | 126152141 | 126165279 | ENSMUSG00<br>000023330 | -3.050797  | -1.6091862 |
| Trim30c       | chr7  | 104382065 | 104390586 | ENSMUSG00<br>000078616 | -3.0487895 | -1.6082366 |
| Chst13        | chr6  | 90308351  | 90325185  | ENSMUSG00<br>000056643 | -3.0402834 | -1.6042058 |
| Nsmce1        | chr7  | 125467640 | 125491596 | ENSMUSG00<br>000030750 | -3.0310776 | -1.5998307 |
| Tbc1d1        | chr5  | 64159451  | 64351486  | ENSMUSG00<br>000029174 | -3.025193  | -1.5970272 |
| Rrm2          | chr12 | 24708241  | 24714146  | ENSMUSG00<br>000020649 | -3.024116  | -1.5965135 |
| Rbm38         | chr2  | 173020498 | 173034734 | ENSMUSG00<br>000027510 | -3.0214822 | -1.5952564 |
| Atad5         | chr11 | 80089400  | 80135794  | ENSMUSG00<br>000017550 | -3.018262  | -1.593718  |
| Cd99l2        | chrX  | 71420060  | 71492849  | ENSMUSG00<br>000035776 | -3.0110974 | -1.5902894 |
| Arid3a        | chr10 | 79927043  | 79955018  | ENSMUSG00<br>000019564 | -2.9998672 | -1.5848986 |
| Pstpip2       | chr18 | 77794545  | 77882007  | ENSMUSG00<br>000025429 | -2.9964638 | -1.5832609 |
| Cd80          | chr16 | 38458933  | 38486933  | ENSMUSG00<br>000075122 | -2.9936452 | -1.5819032 |
| Slc9a7        | chrX  | 20105755  | 20291807  | ENSMUSG00<br>000037341 | -2.987338  | -1.5788605 |
| Chaf1a        | chr17 | 56040416  | 56068026  | ENSMUSG00<br>000002835 | -2.975897  | -1.5733247 |
| 2410076l21Rik | chr9  | 58652856  | 58741559  | ENSMUSG00<br>000074269 | -2.9754064 | -1.5730867 |
| Phlda2        | chr7  | 143501545 | 143502541 | ENSMUSG00<br>000010760 | -2.9686224 | -1.5697936 |
| Rhoh          | chr5  | 65863569  | 65896700  | ENSMUSG00              | -2.958726  | -1.5649761 |

|               |       |           |           |                        |            |            |
|---------------|-------|-----------|-----------|------------------------|------------|------------|
|               |       |           |           | 000029204              |            |            |
| Pde3b         | chr7  | 114415281 | 114539251 | ENSMUSG00<br>000030671 | -2.9549525 | -1.5631349 |
| Rsad2         | chr12 | 26442753  | 26456452  | ENSMUSG00<br>000020641 | -2.9522533 | -1.5618166 |
| Malt1         | chr18 | 65430963  | 65478823  | ENSMUSG00<br>000032688 | -2.9500957 | -1.5607617 |
| F3            | chr3  | 121723537 | 121735052 | ENSMUSG00<br>000028128 | -2.9429207 | -1.5572487 |
| Plk4          | chr3  | 40800019  | 40816883  | ENSMUSG00<br>000025758 | -2.9428558 | -1.5572169 |
| Nin           | chr12 | 70011435  | 70111925  | ENSMUSG00<br>000021068 | -2.941708  | -1.5566541 |
| P2ry14        | chr3  | 59114626  | 59130624  | ENSMUSG00<br>000036381 | -2.9393828 | -1.5555133 |
| Hif1a         | chr12 | 73901375  | 73947530  | ENSMUSG00<br>000021109 | -2.9369276 | -1.5543077 |
| Arid4a        | chr12 | 71015990  | 71098592  | ENSMUSG00<br>000048118 | -2.9281    | -1.5499649 |
| Smc3          | chr19 | 53600398  | 53645833  | ENSMUSG00<br>000024974 | -2.9259684 | -1.5489142 |
| Oit3          | chr10 | 59422958  | 59441778  | ENSMUSG00<br>000009654 | -2.9249442 | -1.5484091 |
| Tbc1d12       | chr19 | 38836579  | 38919923  | ENSMUSG00<br>000048720 | -2.9231734 | -1.5475354 |
| Mpp7          | chr18 | 7347962   | 7626863   | ENSMUSG00<br>000057440 | -2.9200006 | -1.5459687 |
| Nup210        | chr6  | 91013068  | 91116829  | ENSMUSG00<br>000030091 | -2.9194355 | -1.5456895 |
| Fam65b        | chr13 | 24582189  | 24733816  | ENSMUSG00<br>000036006 | -2.9191916 | -1.545569  |
| Adamtsl4      | chr3  | 95676201  | 95687917  | ENSMUSG00<br>000015850 | -2.913368  | -1.5426879 |
| Zeb2          | chr2  | 44983634  | 45117395  | ENSMUSG00<br>000026872 | -2.9055104 | -1.5387917 |
| Ifih1         | chr2  | 62595798  | 62646255  | ENSMUSG00<br>000026896 | -2.894852  | -1.5334896 |
| Terf1         | chr1  | 15805658  | 15843428  | ENSMUSG00<br>000025925 | -2.8904097 | -1.531274  |
| 8430408G22Rik | chr6  | 116650684 | 116652847 | ENSMUSG00<br>000048489 | -2.8901036 | -1.5311213 |
| Rock1         | chr18 | 10064401  | 10181792  | ENSMUSG00<br>000024290 | -2.8880382 | -1.5300899 |
| Sgol2         | chr1  | 57995971  | 58025899  | ENSMUSG00<br>000026039 | -2.8823936 | -1.5272673 |
| Thbs1         | chr2  | 118111876 | 118127133 | ENSMUSG00<br>000040152 | -2.8823156 | -1.5272284 |
| Baz2b         | chr2  | 59899363  | 60209839  | ENSMUSG00<br>000026987 | -2.8807142 | -1.5264266 |
| Aadac         | chr3  | 60031763  | 60040160  | ENSMUSG00<br>000027761 | -2.880473  | -1.5263057 |
| Tg            | chr15 | 66670753  | 66850721  | ENSMUSG00<br>000053469 | -2.8801324 | -1.5261352 |
| Fbxo5         | chr10 | 5799160   | 5805600   | ENSMUSG00<br>000019773 | -2.8796694 | -1.5259032 |
| Tmed5         | chr5  | 108106366 | 108132620 | ENSMUSG00<br>000063406 | -2.8690543 | -1.5205753 |
| Gata1         | chrX  | 7959260   | 7978071   | ENSMUSG00<br>000031162 | -2.8681977 | -1.5201445 |

|               |       |           |           |                        |            |            |
|---------------|-------|-----------|-----------|------------------------|------------|------------|
| Slfn4         | chr11 | 83175186  | 83190221  | ENSMUSG00<br>000000204 | -2.8677645 | -1.5199265 |
| Gbp8          | chr5  | 105014153 | 105139540 | ENSMUSG00<br>000034438 | -2.8657267 | -1.518901  |
| Cdk5r1        | chr11 | 80477046  | 80481179  | ENSMUSG00<br>000048895 | -2.8647017 | -1.5183849 |
| Nudcd1        | chr15 | 44375227  | 44428307  | ENSMUSG00<br>000038736 | -2.8591332 | -1.5155779 |
| Ing1          | chr8  | 11556066  | 11563250  | ENSMUSG00<br>000045969 | -2.849907  | -1.5109148 |
| Rnf125        | chr18 | 20944625  | 20983848  | ENSMUSG00<br>000033107 | -2.8433046 | -1.5075687 |
| Rcn2          | chr9  | 56041845  | 56061882  | ENSMUSG00<br>000032320 | -2.841286  | -1.506544  |
| Fam78b        | chr1  | 167001417 | 167091302 | ENSMUSG00<br>000060568 | -2.8330545 | -1.5023584 |
| Ppp1r15a      | chr7  | 45522916  | 45526268  | ENSMUSG00<br>000040435 | -2.821368  | -1.4963949 |
| Mettl5        | chr2  | 69871198  | 69885615  | ENSMUSG00<br>000051730 | -2.8183947 | -1.4948736 |
| Nfkbid        | chr7  | 30421732  | 30428746  | ENSMUSG00<br>000036931 | -2.8178687 | -1.4946043 |
| Fbxo42        | chr4  | 141147913 | 141204062 | ENSMUSG00<br>000028920 | -2.8166215 | -1.4939657 |
| Siglecg       | chr7  | 43408204  | 43418358  | ENSMUSG00<br>000030468 | -2.8132222 | -1.4922235 |
| Pde7a         | chr3  | 19223108  | 19311322  | ENSMUSG00<br>000069094 | -2.810607  | -1.4908817 |
| Tns4          | chr11 | 99065678  | 99089306  | ENSMUSG00<br>000017607 | -2.8083115 | -1.4897029 |
| Gpr68         | chr12 | 100876682 | 100908198 | ENSMUSG00<br>000047415 | -2.800796  | -1.485837  |
| Med12l        | chr3  | 59006978  | 59318410  | ENSMUSG00<br>000056476 | -2.7964165 | -1.4835793 |
| Trbv21        | chr6  | 41202755  | 41203044  | ENSMUSG00<br>000076477 | -2.7941484 | -1.4824086 |
| Ifi203        | chr1  | 173920407 | 173942672 | ENSMUSG00<br>000039997 | -2.7941394 | -1.482404  |
| Arhgap15      | chr2  | 43748824  | 44395953  | ENSMUSG00<br>000049744 | -2.7911947 | -1.4808828 |
| Plekhg1       | chr10 | 3740364   | 3967303   | ENSMUSG00<br>000040624 | -2.7845612 | -1.47745   |
| 1500011B03Rik | chr5  | 114812793 | 114813945 | ENSMUSG00<br>000092279 | -2.784556  | -1.4774473 |
| Hic1          | chr11 | 75164565  | 75169519  | ENSMUSG00<br>000043099 | -2.7736695 | -1.4717959 |
| I830077J02Rik | chr3  | 105925891 | 105932664 | ENSMUSG00<br>000074342 | -2.7704415 | -1.4701159 |
| Ankle1        | chr8  | 71406010  | 71409904  | ENSMUSG00<br>000046295 | -2.7698884 | -1.4698279 |
| Gcfc1         | chr16 | 91014037  | 91044543  | ENSMUSG00<br>000022974 | -2.7690175 | -1.4693742 |
| Nme7          | chr1  | 164312879 | 164348181 | ENSMUSG00<br>000026575 | -2.7682343 | -1.468966  |
| Kif20b        | chr19 | 34922358  | 34975731  | ENSMUSG00<br>000024795 | -2.762871  | -1.4661682 |
| D730048J04Rik | chr17 | 43534174  | 43543639  | ENSMUSG00<br>000096140 | -2.7614033 | -1.4654016 |
| BC030867      | chr11 | 102248882 | 102265187 | ENSMUSG00              | -2.750373  | -1.4596273 |



|               |       |           |           |                        |            |            |
|---------------|-------|-----------|-----------|------------------------|------------|------------|
|               |       |           |           | 000034773              |            |            |
| Zfp605        | chr5  | 110110092 | 110129794 | ENSMUSG00<br>000023284 | -2.7498915 | -1.4593747 |
| Mov10         | chr3  | 104794836 | 104818563 | ENSMUSG00<br>000002227 | -2.74395   | -1.4562541 |
| Mki67         | chr7  | 135689788 | 135716379 | ENSMUSG00<br>000031004 | -2.7434251 | -1.4559782 |
| Cbfa2t3       | chr8  | 122628739 | 122699109 | ENSMUSG00<br>000006362 | -2.7345307 | -1.4512932 |
| Stil          | chr4  | 115000159 | 115043196 | ENSMUSG00<br>000028718 | -2.7336185 | -1.4508119 |
| Bank1         | chr3  | 136053363 | 136326046 | ENSMUSG00<br>000037922 | -2.7309744 | -1.4494158 |
| Il1f9         | chr2  | 24186476  | 24193568  | ENSMUSG00<br>000044103 | -2.7292345 | -1.4484963 |
| Zmynd17       | chr14 | 20482864  | 20496901  | ENSMUSG00<br>000021815 | -2.723371  | -1.4453936 |
| P2ry10        | chrX  | 107088492 | 107104974 | ENSMUSG00<br>000050921 | -2.7184167 | -1.4427667 |
| Hhex          | chr19 | 37432887  | 37440728  | ENSMUSG00<br>000024986 | -2.7157395 | -1.4413451 |
| Spon1         | chr7  | 113765998 | 114043370 | ENSMUSG00<br>000038156 | -2.7148411 | -1.4408678 |
| Bod11         | chr5  | 41787542  | 41844168  | ENSMUSG00<br>000061755 | -2.7140775 | -1.4404619 |
| Samsn1        | chr16 | 75858793  | 76022270  | ENSMUSG00<br>000022876 | -2.7119412 | -1.4393259 |
| Slc16a3       | chr11 | 120948480 | 120960868 | ENSMUSG00<br>000025161 | -2.707155  | -1.4367775 |
| Zfp772        | chr7  | 7202122   | 7209998   | ENSMUSG00<br>000066838 | -2.7065508 | -1.4364555 |
| Frat2         | chr19 | 41845978  | 41848132  | ENSMUSG00<br>000047604 | -2.7063136 | -1.436329  |
| Cytip         | chr2  | 58129137  | 58195532  | ENSMUSG00<br>000026832 | -2.7058496 | -1.4360816 |
| Trim30a       | chr7  | 104409025 | 104465193 | ENSMUSG00<br>000030921 | -2.7009246 | -1.4334533 |
| Siglec1       | chr2  | 131069220 | 131086765 | ENSMUSG00<br>000027322 | -2.6988337 | -1.4323361 |
| 2810474019Rik | chr6  | 149309414 | 149335658 | ENSMUSG00<br>000032712 | -2.6982014 | -1.431998  |
| AC238811.1    | chr13 | 120026439 | 120027011 | ENSMUSG00<br>000095029 | -2.695484  | -1.4305443 |
| Ttc19         | chr11 | 62281473  | 62328451  | ENSMUSG00<br>000042298 | -2.693799  | -1.4296422 |
| Hist1h2bj     | chr13 | 22043214  | 22043676  | ENSMUSG00<br>000069300 | -2.6931243 | -1.4292809 |
| Srek1         | chr13 | 103741615 | 103764504 | ENSMUSG00<br>000032621 | -2.6895013 | -1.4273387 |
| Polg2         | chr11 | 106768253 | 106779537 | ENSMUSG00<br>000020718 | -2.688866  | -1.4269978 |
| Ccl8          | chr11 | 82115185  | 82116799  | ENSMUSG00<br>000009185 | -2.6879518 | -1.4265072 |
| Ccdc55        | chr11 | 77044292  | 77078435  | ENSMUSG00<br>000037958 | -2.6815536 | -1.4230691 |
| Ptprc         | chr1  | 138062861 | 138175305 | ENSMUSG00<br>000026395 | -2.6807053 | -1.4226127 |
| Fnip1         | chr11 | 54438199  | 54518235  | ENSMUSG00<br>000035992 | -2.6790376 | -1.4217148 |

|          |       |           |           |                        |            |            |
|----------|-------|-----------|-----------|------------------------|------------|------------|
| Atad2    | chr15 | 58094047  | 58135082  | ENSMUSG00<br>000022360 | -2.6788192 | -1.4215972 |
| Rab39    | chr9  | 53684110  | 53706232  | ENSMUSG00<br>000055069 | -2.673495  | -1.418727  |
| Mfsd7b   | chr1  | 191005832 | 191026190 | ENSMUSG00<br>000066595 | -2.6725824 | -1.4182345 |
| Pycr2    | chr1  | 180904274 | 180908087 | ENSMUSG00<br>000026520 | -2.6714952 | -1.4176474 |
| Gadd45a  | chr6  | 67035096  | 67037457  | ENSMUSG00<br>000036390 | -2.6679072 | -1.4157085 |
| Cenph    | chr13 | 100759674 | 100775899 | ENSMUSG00<br>000045273 | -2.6656148 | -1.4144683 |
| 7-Mar    | chr2  | 60209887  | 60250676  | ENSMUSG00<br>000026977 | -2.6625533 | -1.4128104 |
| Eml5     | chr12 | 98786604  | 98901484  | ENSMUSG00<br>000051166 | -2.661429  | -1.412201  |
| Tgm2     | chr2  | 158116402 | 158146436 | ENSMUSG00<br>000037820 | -2.6607876 | -1.4118533 |
| Mxd1     | chr6  | 86647044  | 86669159  | ENSMUSG00<br>000001156 | -2.660205  | -1.4115374 |
| Rab37    | chr11 | 115091431 | 115162236 | ENSMUSG00<br>000020732 | -2.6590502 | -1.4109111 |
| Ankrd33b | chr15 | 31291479  | 31367759  | ENSMUSG00<br>000022237 | -2.6582727 | -1.4104891 |
| Kmo      | chr1  | 175620381 | 175662116 | ENSMUSG00<br>000039783 | -2.655987  | -1.4092481 |
| Arc      | chr15 | 74669083  | 74672570  | ENSMUSG00<br>000022602 | -2.655753  | -1.4091209 |
| Fxyd4    | chr6  | 117933729 | 117937335 | ENSMUSG00<br>000004988 | -2.6526072 | -1.4074111 |
| BC016423 | chr13 | 3566036   | 3611108   | ENSMUSG00<br>000033799 | -2.651814  | -1.4069796 |
| Tmem71   | chr15 | 66526212  | 66561046  | ENSMUSG00<br>000036944 | -2.6497562 | -1.4058596 |
| Lyar     | chr5  | 38220470  | 38234306  | ENSMUSG00<br>000067367 | -2.6488583 | -1.4053707 |
| Fam196b  | chr11 | 34314822  | 34422640  | ENSMUSG00<br>000069911 | -2.6485374 | -1.4051958 |
| Top2a    | chr11 | 98992943  | 99024189  | ENSMUSG00<br>000020914 | -2.6483493 | -1.4050934 |
| Pbk      | chr14 | 65805837  | 65817822  | ENSMUSG00<br>000022033 | -2.6452084 | -1.4033813 |
| Rab44    | chr17 | 29135056  | 29148980  | ENSMUSG00<br>000064147 | -2.6449566 | -1.403244  |
| Cish     | chr9  | 107296026 | 107302784 | ENSMUSG00<br>000032578 | -2.6384535 | -1.3996925 |
| Slc24a3  | chr2  | 145167754 | 145642166 | ENSMUSG00<br>000063873 | -2.6301973 | -1.395171  |
| Slc7a11  | chr3  | 50364936  | 50443613  | ENSMUSG00<br>000027737 | -2.628285  | -1.3941216 |
| Smc5     | chr19 | 23206441  | 23273897  | ENSMUSG00<br>000024943 | -2.626037  | -1.3928871 |
| Tnfsf10  | chr3  | 27317028  | 27342427  | ENSMUSG00<br>000039304 | -2.624484  | -1.3920338 |
| Ica11    | chr1  | 59989070  | 60043087  | ENSMUSG00<br>000026018 | -2.6190307 | -1.389033  |
| Mfsd2a   | chr4  | 122946850 | 122961188 | ENSMUSG00<br>000028655 | -2.6183174 | -1.3886399 |
| Siglec5  | chr7  | 43351341  | 43359531  | ENSMUSG00              | -2.6171868 | -1.3880169 |

|               |       |           |           |                        |            |            |
|---------------|-------|-----------|-----------|------------------------|------------|------------|
|               |       |           |           | 000039013              |            |            |
| Slamf6        | chr1  | 171917537 | 171943868 | ENSMUSG00<br>000015314 | -2.6162674 | -1.3875101 |
| Rasal3        | chr17 | 32390659  | 32403583  | ENSMUSG00<br>000052142 | -2.615341  | -1.386999  |
| Tnfaip3       | chr10 | 19000910  | 19015657  | ENSMUSG00<br>000019850 | -2.6150372 | -1.3868315 |
| Tcf19         | chr17 | 35512734  | 35516824  | ENSMUSG00<br>000050410 | -2.6149857 | -1.386803  |
| Uhrf1         | chr17 | 56303321  | 56323486  | ENSMUSG00<br>000001228 | -2.6129801 | -1.3856962 |
| Fanca         | chr8  | 123268300 | 123318576 | ENSMUSG00<br>000032815 | -2.6101494 | -1.3841324 |
| Fbxo24        | chr5  | 137612503 | 137629002 | ENSMUSG00<br>000089984 | -2.6098404 | -1.3839616 |
| Donson        | chr16 | 91677268  | 91688765  | ENSMUSG00<br>000022960 | -2.6088214 | -1.3833982 |
| Mtmr10        | chr7  | 64287653  | 64340407  | ENSMUSG00<br>000030522 | -2.6079698 | -1.3829272 |
| Mx1           | chr16 | 97447035  | 97462907  | ENSMUSG00<br>000000386 | -2.6041436 | -1.3808091 |
| BC055324      | chr1  | 163945993 | 163994796 | ENSMUSG00<br>000041406 | -2.6040976 | -1.3807836 |
| Zfp101        | chr17 | 33360507  | 33394641  | ENSMUSG00<br>000055240 | -2.6039152 | -1.3806825 |
| Parp14        | chr16 | 35832874  | 35871544  | ENSMUSG00<br>000034422 | -2.602994  | -1.380172  |
| Suco          | chr1  | 161816112 | 161876661 | ENSMUSG00<br>000040297 | -2.6026106 | -1.3799595 |
| A430078G23Rik | chr8  | 3353415   | 3390295   | ENSMUSG00<br>000074497 | -2.6014252 | -1.3793021 |
| Gm6377        | chrX  | 109196756 | 109200439 | ENSMUSG00<br>000048621 | -2.599558  | -1.3782665 |
| Nek2          | chr1  | 191821444 | 191833050 | ENSMUSG00<br>000026622 | -2.5985894 | -1.3777287 |
| Rbm12b2       | chr4  | 12089439  | 12096243  | ENSMUSG00<br>000052137 | -2.5916524 | -1.3738723 |
| Amica1        | chr9  | 45079183  | 45108530  | ENSMUSG00<br>000048534 | -2.5910037 | -1.3735111 |
| Mefv          | chr16 | 3707215   | 3718124   | ENSMUSG00<br>000022534 | -2.5870204 | -1.3712914 |
| Izumo4        | chr10 | 80702693  | 80705382  | ENSMUSG00<br>000055862 | -2.5788908 | -1.3667507 |
| Spata2l       | chr8  | 123232255 | 123236209 | ENSMUSG00<br>000033594 | -2.5780864 | -1.3663006 |
| Alpi          | chr1  | 87098002  | 87101606  | ENSMUSG00<br>000079440 | -2.574566  | -1.3643292 |
| Jazf1         | chr6  | 52768797  | 53068631  | ENSMUSG00<br>000063568 | -2.5662332 | -1.3596523 |
| Zfp281        | chr1  | 136624901 | 136630053 | ENSMUSG00<br>000041483 | -2.565682  | -1.3593423 |
| Tnfrsf26      | chr7  | 143607685 | 143627845 | ENSMUSG00<br>000045362 | -2.564845  | -1.3588717 |
| Zfp146        | chr7  | 30161274  | 30169727  | ENSMUSG00<br>000037029 | -2.5647655 | -1.3588269 |
| Polr3a        | chr14 | 24448694  | 24487046  | ENSMUSG00<br>000025280 | -2.564669  | -1.3587725 |
| Ska3          | chr14 | 57806561  | 57826163  | ENSMUSG00<br>000021965 | -2.5564692 | -1.3541527 |

|               |       |           |           |                        |            |            |
|---------------|-------|-----------|-----------|------------------------|------------|------------|
| Klhl20        | chr1  | 161088375 | 161131511 | ENSMUSG00<br>000026705 | -2.5510824 | -1.3511095 |
| Chic2         | chr5  | 75001026  | 75044774  | ENSMUSG00<br>000029229 | -2.5501292 | -1.3505703 |
| Kif4          | chrX  | 100625737 | 100727214 | ENSMUSG00<br>000034311 | -2.5499015 | -1.3504416 |
| Lrrtm2        | chr18 | 35209011  | 35215024  | ENSMUSG00<br>000071862 | -2.5458705 | -1.3481591 |
| Slc16a6       | chr11 | 109450855 | 109473598 | ENSMUSG00<br>000041920 | -2.5453    | -1.3478357 |
| Slc36a2       | chr11 | 55158470  | 55185077  | ENSMUSG00<br>000020264 | -2.5448275 | -1.3475678 |
| Hist1h3c      | chr13 | 23744973  | 23745602  | ENSMUSG00<br>000069310 | -2.5424957 | -1.3462454 |
| Tiparp        | chr3  | 65528410  | 65555145  | ENSMUSG00<br>000034640 | -2.5411766 | -1.3454967 |
| Gm17359       | chr3  | 79345376  | 79464129  | ENSMUSG00<br>000091685 | -2.5405767 | -1.345156  |
| A930039A15Rik | chr1  | 153905301 | 153916910 | ENSMUSG00<br>000078493 | -2.5396369 | -1.3446223 |
| Mettl25       | chr10 | 105763189 | 105841380 | ENSMUSG00<br>000036009 | -2.5381992 | -1.3438053 |
| Abcg3         | chr5  | 104935057 | 104982718 | ENSMUSG00<br>000029299 | -2.5370107 | -1.3431296 |
| Gna15         | chr10 | 81502306  | 81524225  | ENSMUSG00<br>000034792 | -2.5366766 | -1.3429396 |
| F5            | chr1  | 164151838 | 164220277 | ENSMUSG00<br>000026579 | -2.5300317 | -1.3391554 |
| Larp7         | chr3  | 127536954 | 127553348 | ENSMUSG00<br>000027968 | -2.5297866 | -1.3390157 |
| Mylk          | chr16 | 34745210  | 35002420  | ENSMUSG00<br>000022836 | -2.5295393 | -1.3388747 |
| Ubash3b       | chr9  | 41011098  | 41161697  | ENSMUSG00<br>000032020 | -2.5294998 | -1.3388522 |
| Pga5          | chr19 | 10668957  | 10678071  | ENSMUSG00<br>000024738 | -2.5291429 | -1.3386486 |
| Ccne2         | chr4  | 11191351  | 11204779  | ENSMUSG00<br>000028212 | -2.5269122 | -1.3373755 |
| Mctp1         | chr13 | 76384535  | 77031810  | ENSMUSG00<br>000021596 | -2.5259438 | -1.3368225 |
| Gm20662       | chr9  | 107996349 | 108045270 | ENSMUSG00<br>000093456 | -2.5237772 | -1.3355846 |
| Ikzf2         | chr1  | 69531214  | 69685960  | ENSMUSG00<br>000025997 | -2.5229397 | -1.3351057 |
| Lrp8          | chr4  | 107802261 | 107876840 | ENSMUSG00<br>000028613 | -2.5141985 | -1.3300986 |
| Bach2         | chr4  | 32238804  | 32586108  | ENSMUSG00<br>000040270 | -2.5112934 | -1.3284307 |
| Rps6kc1       | chr1  | 190700202 | 190911770 | ENSMUSG00<br>000089872 | -2.508029  | -1.3265541 |
| Dennd1b       | chr1  | 138963436 | 139176043 | ENSMUSG00<br>000056268 | -2.5074694 | -1.3262321 |
| EVI2B         | chr11 | 79513385  | 79530589  | ENSMUSG00<br>000093938 | -2.5054333 | -1.3250601 |
| Gm15448       | chr7  | 3816781   | 3825687   | ENSMUSG00<br>000074419 | -2.5037377 | -1.3240834 |
| Mfsd3         | chr15 | 76701542  | 76704239  | ENSMUSG00<br>000019080 | -2.5022283 | -1.3232133 |
| Zfyve28       | chr5  | 34194874  | 34288449  | ENSMUSG00              | -2.5022244 | -1.3232112 |

|               |       |           |           |                        |            |            |
|---------------|-------|-----------|-----------|------------------------|------------|------------|
|               |       |           |           | 000037224              |            |            |
| Evi2b         | chr11 | 79513385  | 79530559  | ENSMUSG00<br>000070354 | -2.5012906 | -1.3226726 |
| Cdc42ep3      | chr17 | 79334025  | 79355091  | ENSMUSG00<br>000036533 | -2.4974809 | -1.3204737 |
| Aqp9          | chr9  | 71110659  | 71168682  | ENSMUSG00<br>000032204 | -2.4948306 | -1.3189418 |
| Wdfy4         | chr14 | 32959547  | 33185508  | ENSMUSG00<br>000051506 | -2.494171  | -1.3185604 |
| Osm           | chr11 | 4236420   | 4241026   | ENSMUSG00<br>000058755 | -2.492849  | -1.3177955 |
| Herc6         | chr6  | 57580992  | 57665136  | ENSMUSG00<br>000029798 | -2.492007  | -1.3173082 |
| Svil          | chr18 | 4920540   | 5119299   | ENSMUSG00<br>000024236 | -2.4905818 | -1.3164828 |
| Nsun6         | chr2  | 14995131  | 15054884  | ENSMUSG00<br>000026707 | -2.4858334 | -1.3137296 |
| Stat4         | chr1  | 51987148  | 52107188  | ENSMUSG00<br>000062939 | -2.4826412 | -1.3118758 |
| 2610524H06Rik | chr5  | 114821935 | 114823468 | ENSMUSG00<br>000092486 | -2.4813268 | -1.3111118 |
| Agl           | chr3  | 116739999 | 116808166 | ENSMUSG00<br>000033400 | -2.4792001 | -1.3098748 |
| Antxr2        | chr5  | 97882783  | 98030733  | ENSMUSG00<br>000029338 | -2.4787767 | -1.3096282 |
| Zfp367        | chr13 | 64133022  | 64153202  | ENSMUSG00<br>000044934 | -2.4783263 | -1.3093662 |
| Dapk2         | chr9  | 66158223  | 66272242  | ENSMUSG00<br>000032380 | -2.477351  | -1.3087982 |
| Smarca2       | chr19 | 26605115  | 26778321  | ENSMUSG00<br>000024921 | -2.4744163 | -1.3070883 |
| Nhsl2         | chrX  | 101849385 | 102092055 | ENSMUSG00<br>000079481 | -2.4741192 | -1.306915  |
| Myo5a         | chr9  | 75071015  | 75223688  | ENSMUSG00<br>000034593 | -2.473825  | -1.3067434 |
| Mphosph10     | chr7  | 64376576  | 64392268  | ENSMUSG00<br>000030521 | -2.4702406 | -1.3046515 |
| Zranb1        | chr7  | 132931142 | 132986391 | ENSMUSG00<br>000030967 | -2.467636  | -1.3031297 |
| Specc1        | chr11 | 61956779  | 62223013  | ENSMUSG00<br>000042331 | -2.4674594 | -1.3030263 |
| Nipbl         | chr15 | 8291225   | 8444463   | ENSMUSG00<br>000022141 | -2.4624178 | -1.3000755 |
| Atxn7l1       | chr12 | 33147693  | 33375659  | ENSMUSG00<br>000020564 | -2.4607053 | -1.2990719 |
| Kntc1         | chr5  | 123749726 | 123821593 | ENSMUSG00<br>000029414 | -2.4568    | -1.2967803 |
| Tapbpl        | chr6  | 125223933 | 125231860 | ENSMUSG00<br>000038213 | -2.454444  | -1.2953962 |
| Myo9a         | chr9  | 59750896  | 59928866  | ENSMUSG00<br>000039585 | -2.452725  | -1.2943854 |
| St3gal4       | chr9  | 35046579  | 35116810  | ENSMUSG00<br>000032038 | -2.4499447 | -1.2927492 |
| Ddx46         | chr13 | 55635027  | 55681256  | ENSMUSG00<br>000021500 | -2.4488137 | -1.292083  |
| Chaf1b        | chr16 | 93883901  | 93906115  | ENSMUSG00<br>000022945 | -2.4464347 | -1.2906808 |
| Tmem154       | chr3  | 84666192  | 84704575  | ENSMUSG00<br>000056498 | -2.4443808 | -1.289469  |

|               |       |           |           |                   |            |            |
|---------------|-------|-----------|-----------|-------------------|------------|------------|
| Rps6ka2       | chr17 | 7170115   | 7303313   | ENSMUSG0000023809 | -2.4430933 | -1.2887089 |
| Clec4e        | chr6  | 123281789 | 123289870 | ENSMUSG0000030142 | -2.4428995 | -1.2885945 |
| Ckap2l        | chr2  | 129268210 | 129297212 | ENSMUSG0000048327 | -2.441718  | -1.2878966 |
| Esco2         | chr14 | 65819038  | 65833994  | ENSMUSG0000022034 | -2.440632  | -1.2872548 |
| 4933427D14Rik | chr11 | 72153929  | 72207459  | ENSMUSG0000020807 | -2.4403467 | -1.2870861 |
| Phip          | chr9  | 82866159  | 82975489  | ENSMUSG0000032253 | -2.43712   | -1.2851772 |
| Hspa1b        | chr17 | 34956436  | 34959238  | ENSMUSG0000090877 | -2.4357438 | -1.2843624 |
| Vrk1          | chr12 | 106010263 | 106077410 | ENSMUSG0000021115 | -2.4346654 | -1.2837236 |
| Dhx34         | chr7  | 16197147  | 16222037  | ENSMUSG0000006019 | -2.4305038 | -1.2812555 |
| Mgll          | chr6  | 88724412  | 88828360  | ENSMUSG0000033174 | -2.4301782 | -1.2810621 |
| Fer           | chr17 | 63896018  | 64139494  | ENSMUSG0000000127 | -2.429077  | -1.2804081 |
| Tarm1         | chr7  | 3489079   | 3502465   | ENSMUSG0000053338 | -2.4282959 | -1.2799442 |
| Itpkb         | chr1  | 180330485 | 180424802 | ENSMUSG0000038855 | -2.4272187 | -1.279304  |
| Chst11        | chr10 | 82985498  | 83195900  | ENSMUSG0000034612 | -2.42546   | -1.2782584 |
| Hist2h2ac     | chr3  | 96220361  | 96220880  | ENSMUSG0000068855 | -2.4242928 | -1.2775639 |
| Gpr141        | chr13 | 19749682  | 19824257  | ENSMUSG0000053101 | -2.4158788 | -1.2725481 |
| P2rx1         | chr11 | 72999103  | 73015200  | ENSMUSG0000020787 | -2.4155192 | -1.2723334 |
| Olr1          | chr6  | 129485246 | 129507165 | ENSMUSG0000030162 | -2.4133291 | -1.2710247 |
| Tec           | chr5  | 72755718  | 72868483  | ENSMUSG0000029217 | -2.4090686 | -1.2684755 |
| Areg          | chr5  | 91139615  | 91148432  | ENSMUSG0000029378 | -2.4021156 | -1.2643056 |
| Dhrs7         | chr12 | 72650356  | 72664828  | ENSMUSG0000021094 | -2.4011137 | -1.2637037 |
| Crtc3         | chr7  | 80586627  | 80688877  | ENSMUSG0000030527 | -2.3962023 | -1.2607497 |
| Zfp292        | chr4  | 34803113  | 34882960  | ENSMUSG0000039967 | -2.3941135 | -1.2594916 |
| Cir1          | chr2  | 73283105  | 73312701  | ENSMUSG0000041777 | -2.3939593 | -1.2593986 |
| Acsl4         | chrX  | 142317993 | 142390535 | ENSMUSG0000031278 | -2.3922825 | -1.2583878 |
| Rnpc3         | chr3  | 113605067 | 113630149 | ENSMUSG0000027981 | -2.3921478 | -1.2583065 |
| Ppid          | chr3  | 79591342  | 79603650  | ENSMUSG0000027804 | -2.3916154 | -1.2579854 |
| Lilra6        | chr7  | 3908280   | 3915503   | ENSMUSG0000030427 | -2.3900595 | -1.2570465 |
| Fam132b       | chr1  | 91366430  | 91374216  | ENSMUSG0000047443 | -2.3881783 | -1.2559105 |
| Prkd2         | chr7  | 16842902  | 16870461  | ENSMUSG00         | -2.388102  | -1.2558645 |

|               |       |           |           |                        |            |            |
|---------------|-------|-----------|-----------|------------------------|------------|------------|
|               |       |           |           | 000041187              |            |            |
| Cenpc1        | chr5  | 86012043  | 86065583  | ENSMUSG00<br>000029253 | -2.3879516 | -1.2557737 |
| 2700050L05Rik | chr7  | 133637543 | 133672971 | ENSMUSG00<br>000039990 | -2.3868032 | -1.2550796 |
| Akap8l        | chr17 | 32321425  | 32350581  | ENSMUSG00<br>000002625 | -2.3845513 | -1.2537178 |
| Arap3         | chr18 | 37972624  | 37997574  | ENSMUSG00<br>000024451 | -2.3836453 | -1.2531695 |
| Atp8b4        | chr2  | 126320973 | 126500674 | ENSMUSG00<br>000060131 | -2.3818843 | -1.2521033 |
| Nfil3         | chr13 | 52967209  | 52981073  | ENSMUSG00<br>000056749 | -2.3808434 | -1.2514727 |
| Tgds          | chr14 | 118111911 | 118132765 | ENSMUSG00<br>000022130 | -2.3807857 | -1.2514378 |
| Smad6         | chr9  | 63953076  | 64022059  | ENSMUSG00<br>000036867 | -2.3798523 | -1.250872  |
| Abca7         | chr10 | 79996494  | 80015572  | ENSMUSG00<br>000035722 | -2.3785663 | -1.2500923 |
| Gm17567       | chr10 | 33994989  | 33995054  | ENSMUSG00<br>000090666 | -2.3778365 | -1.2496495 |
| Rbak          | chr5  | 143172186 | 143180775 | ENSMUSG00<br>000061898 | -2.3777556 | -1.2496005 |
| Cuedc1        | chr11 | 88099146  | 88194140  | ENSMUSG00<br>000018378 | -2.3757682 | -1.2483941 |
| 9130011E15Rik | chr19 | 45818144  | 45998488  | ENSMUSG00<br>000039901 | -2.3725374 | -1.2464308 |
| Cep250        | chr2  | 155956458 | 155998900 | ENSMUSG00<br>000038241 | -2.3680928 | -1.2437255 |
| Lrrc8d        | chr5  | 105699969 | 105832436 | ENSMUSG00<br>000046079 | -2.3677459 | -1.2435142 |
| Fam76b        | chr9  | 13827716  | 13846541  | ENSMUSG00<br>000037808 | -2.36498   | -1.241828  |
| Sh2d3c        | chr2  | 32721055  | 32755512  | ENSMUSG00<br>000059013 | -2.364161  | -1.2413284 |
| Cyp26a1       | chr19 | 37697808  | 37701528  | ENSMUSG00<br>000024987 | -2.3641396 | -1.2413152 |
| Ptplad2       | chr4  | 88396144  | 88438928  | ENSMUSG00<br>000028497 | -2.3626845 | -1.240427  |
| Top2b         | chr14 | 16365179  | 16430787  | ENSMUSG00<br>000017485 | -2.3607423 | -1.2392406 |
| Arhgap30      | chr1  | 171388954 | 171410298 | ENSMUSG00<br>000048865 | -2.3599749 | -1.2387714 |
| Arrdc3        | chr13 | 80883384  | 80896035  | ENSMUSG00<br>000074794 | -2.3596463 | -1.2385707 |
| Zfp654        | chr16 | 64780351  | 64786321  | ENSMUSG00<br>000047141 | -2.3593102 | -1.238365  |
| Plcl2         | chr17 | 50509547  | 50688493  | ENSMUSG00<br>000038910 | -2.3514917 | -1.2335763 |
| Aim2          | chr1  | 173350879 | 173466040 | ENSMUSG00<br>000037860 | -2.3506284 | -1.2330465 |
| 2610021A01Rik | chr7  | 41599261  | 41628533  | ENSMUSG00<br>000091474 | -2.3497138 | -1.232485  |
| Prkcb         | chr7  | 122288751 | 122634402 | ENSMUSG00<br>000052889 | -2.3483982 | -1.231677  |
| Ifit3         | chr19 | 34583531  | 34588731  | ENSMUSG00<br>000074896 | -2.3483632 | -1.2316556 |
| Srpk2         | chr5  | 23503356  | 23616571  | ENSMUSG00<br>000062604 | -2.3478963 | -1.2313688 |

|               |       |           |           |                   |            |            |
|---------------|-------|-----------|-----------|-------------------|------------|------------|
| Fbxl3         | chr14 | 103080239 | 103099566 | ENSMUSG0000022124 | -2.3475509 | -1.2311563 |
| Ddx10         | chr9  | 53098454  | 53248112  | ENSMUSG0000053289 | -2.3472352 | -1.2309624 |
| Plxnc1        | chr10 | 94790866  | 94944578  | ENSMUSG0000074785 | -2.3449125 | -1.2295341 |
| Tbc1d8b       | chrX  | 139684996 | 139753405 | ENSMUSG0000042473 | -2.3440208 | -1.2289854 |
| Cln5          | chrX  | 7153810   | 7319358   | ENSMUSG0000004317 | -2.3431902 | -1.228474  |
| A530054K11Rik | chr13 | 67617001  | 67637791  | ENSMUSG0000021510 | -2.3388238 | -1.2257831 |
| Stard9        | chr2  | 120629126 | 120731897 | ENSMUSG0000033705 | -2.3353112 | -1.2236148 |
| Lmnbl1        | chr18 | 56707813  | 56753424  | ENSMUSG0000024590 | -2.3348699 | -1.2233422 |
| Zbtb8a        | chr4  | 129353628 | 129378116 | ENSMUSG0000028807 | -2.3338587 | -1.2227173 |
| Gramd1b       | chr9  | 40293233  | 40531383  | ENSMUSG0000040111 | -2.3330603 | -1.2222236 |
| Nnat          | chr2  | 157560078 | 157562522 | ENSMUSG0000067786 | -2.3324177 | -1.2218262 |
| Atp11c        | chrX  | 60223290  | 60592698  | ENSMUSG0000062949 | -2.3311102 | -1.2210172 |
| Mmd           | chr11 | 90187684  | 90278589  | ENSMUSG0000003948 | -2.3303175 | -1.2205266 |
| Ddx3y         | chrY  | 1260715   | 1286613   | ENSMUSG0000069045 | -2.3301826 | -1.220443  |
| Il4           | chr11 | 53602982  | 53618669  | ENSMUSG0000000869 | -2.3300102 | -1.2203362 |
| Far2          | chr6  | 148047259 | 148182758 | ENSMUSG0000030303 | -2.3286526 | -1.2194954 |
| Eea1          | chr10 | 95940663  | 96045518  | ENSMUSG0000036499 | -2.323637  | -1.2163846 |
| Al606181      | chr19 | 41593363  | 41596158  | ENSMUSG0000074873 | -2.3218765 | -1.2152913 |
| Whsc1         | chr5  | 33820725  | 33897975  | ENSMUSG0000057406 | -2.3218515 | -1.2152758 |
| Prr11         | chr11 | 87089153  | 87108708  | ENSMUSG0000020493 | -2.3204422 | -1.2143997 |
| Rnf216        | chr5  | 142990893 | 143113020 | ENSMUSG0000045078 | -2.319966  | -1.2141037 |
| Armcx3        | chrX  | 134756595 | 134761455 | ENSMUSG0000049047 | -2.3189979 | -1.2135015 |
| Crnkl1        | chr2  | 145917479 | 145935014 | ENSMUSG0000001767 | -2.3186526 | -1.2132868 |
| Hist1h4i      | chr13 | 22040816  | 22041352  | ENSMUSG0000060639 | -2.3174753 | -1.212554  |
| 1700026L06Rik | chr2  | 28692080  | 28699727  | ENSMUSG0000026809 | -2.3160186 | -1.2116468 |
| Rnf24         | chr2  | 131298064 | 131352892 | ENSMUSG0000048911 | -2.311403  | -1.2087688 |
| Ndel1         | chr11 | 68821434  | 68871858  | ENSMUSG0000018736 | -2.3105845 | -1.2082579 |
| Ntng2         | chr2  | 29194541  | 29253005  | ENSMUSG0000035513 | -2.309863  | -1.2078073 |
| Kynu          | chr2  | 43555329  | 43682715  | ENSMUSG0000026866 | -2.3053465 | -1.2049836 |
| Cluap1        | chr16 | 3908801   | 3941147   | ENSMUSG00         | -2.3052733 | -1.2049378 |



|               |       |           |           |                        |            |            |
|---------------|-------|-----------|-----------|------------------------|------------|------------|
|               |       |           |           | 000014232              |            |            |
| Mtmr3         | chr11 | 4480868   | 4594863   | ENSMUSG00<br>000034354 | -2.3050268 | -1.2047834 |
| BC002059      | chr17 | 16972910  | 16973770  | ENSMUSG00<br>000060149 | -2.3041043 | -1.2042061 |
| Fam117a       | chr11 | 95337018  | 95381872  | ENSMUSG00<br>000038893 | -2.3015878 | -1.2026294 |
| Cdc14a        | chr3  | 116272553 | 116424032 | ENSMUSG00<br>000033502 | -2.2988095 | -1.200887  |
| Dhx58         | chr11 | 100694884 | 100704271 | ENSMUSG00<br>000017830 | -2.2982426 | -1.200531  |
| Ccdc23        | chr4  | 119195306 | 119201298 | ENSMUSG00<br>000028643 | -2.2976565 | -1.2001631 |
| 5-Sep         | chr16 | 18621811  | 18629938  | ENSMUSG00<br>000072214 | -2.2972484 | -1.1999068 |
| Ccdc28b       | chr4  | 129619274 | 129623947 | ENSMUSG00<br>000028795 | -2.296947  | -1.1997176 |
| 10-Sep        | chr10 | 59164113  | 59221847  | ENSMUSG00<br>000019917 | -2.2968533 | -1.1996588 |
| Sirpb1b       | chr3  | 15495754  | 15575065  | ENSMUSG00<br>000095028 | -2.2967935 | -1.1996211 |
| Ppig          | chr2  | 69722545  | 69754012  | ENSMUSG00<br>000042133 | -2.2959557 | -1.1990948 |
| Plcb2         | chr2  | 118707517 | 118728438 | ENSMUSG00<br>000040061 | -2.295035  | -1.1985161 |
| Inpp5j        | chr11 | 3494375   | 3504821   | ENSMUSG00<br>000034570 | -2.2948093 | -1.1983743 |
| Eml4          | chr17 | 83350931  | 83480361  | ENSMUSG00<br>000032624 | -2.2942398 | -1.1980162 |
| I830012016Rik | chr19 | 34607970  | 34613401  | ENSMUSG00<br>000062488 | -2.2942173 | -1.1980021 |
| Gm16039       | chr6  | 8259288   | 8597480   | ENSMUSG00<br>000089862 | -2.2930338 | -1.1972576 |
| Lmln          | chr16 | 33062521  | 33127695  | ENSMUSG00<br>000022802 | -2.2884645 | -1.1943799 |
| 2210404J11Rik | chr17 | 15041641  | 15064232  | ENSMUSG00<br>000036552 | -2.2883325 | -1.1942966 |
| Fam109b       | chr15 | 82338942  | 82345743  | ENSMUSG00<br>000049687 | -2.286809  | -1.1933359 |
| Ogfr          | chr2  | 180589245 | 180595836 | ENSMUSG00<br>000049401 | -2.2861216 | -1.1929021 |
| Smchd1        | chr17 | 71344489  | 71475343  | ENSMUSG00<br>000024054 | -2.2836132 | -1.1913183 |
| Mphosph9      | chr5  | 124250959 | 124327972 | ENSMUSG00<br>000038126 | -2.2835786 | -1.1912965 |
| Bptf          | chr11 | 107033081 | 107132127 | ENSMUSG00<br>000040481 | -2.278101  | -1.1878316 |
| Nrn1          | chr13 | 36725625  | 36734477  | ENSMUSG00<br>000039114 | -2.2751684 | -1.1859734 |
| Itrip1        | chr19 | 47894598  | 47919299  | ENSMUSG00<br>000079254 | -2.274956  | -1.1858387 |
| Hist1h2bg     | chr13 | 23571396  | 23572013  | ENSMUSG00<br>000058385 | -2.2725604 | -1.1843187 |
| Fcho2         | chr13 | 98723407  | 98815449  | ENSMUSG00<br>000041685 | -2.2723815 | -1.184205  |
| 4632434I11Rik | chr7  | 92857529  | 92874213  | ENSMUSG00<br>000030641 | -2.269749  | -1.1825327 |
| Kcna3         | chr3  | 107036162 | 107038129 | ENSMUSG00<br>000047959 | -2.2696085 | -1.1824435 |

|               |       |           |           |                        |            |            |
|---------------|-------|-----------|-----------|------------------------|------------|------------|
| Trim17        | chr11 | 58954685  | 58973098  | ENSMUSG00<br>000036964 | -2.269065  | -1.1820979 |
| 4933406M09Rik | chr1  | 134385940 | 134390981 | ENSMUSG00<br>000050526 | -2.267806  | -1.1812973 |
| Gm8225        | chr17 | 26542760  | 26543715  | ENSMUSG00<br>000068604 | -2.267102  | -1.1808493 |
| Myst4         | chr14 | 21499785  | 21672478  | ENSMUSG00<br>000021767 | -2.2660067 | -1.180152  |
| 9930022D16Rik | chr11 | 109413917 | 109420405 | ENSMUSG00<br>000045065 | -2.265127  | -1.1795919 |
| 1-Sep         | chr7  | 127214447 | 127218498 | ENSMUSG00<br>000000486 | -2.2639198 | -1.1788229 |
| Maff          | chr15 | 79347541  | 79359072  | ENSMUSG00<br>000042622 | -2.2638648 | -1.1787878 |
| Stxbp5        | chr10 | 9755547   | 9901079   | ENSMUSG00<br>000019790 | -2.2630386 | -1.1782612 |
| E2f3          | chr13 | 29906575  | 29985668  | ENSMUSG00<br>000016477 | -2.262303  | -1.1777923 |
| Ncapg2        | chr12 | 116405402 | 116463531 | ENSMUSG00<br>000042029 | -2.2611346 | -1.1770469 |
| Zfp949        | chr9  | 88548020  | 88571086  | ENSMUSG00<br>000032425 | -2.260969  | -1.1769412 |
| Mycbp2        | chr14 | 103113411 | 103346814 | ENSMUSG00<br>000033004 | -2.2580776 | -1.1750951 |
| Cdk11b        | chr4  | 155624854 | 155649938 | ENSMUSG00<br>000029062 | -2.2577395 | -1.1748791 |
| Mier1         | chr4  | 103114390 | 103165754 | ENSMUSG00<br>000028522 | -2.2559776 | -1.1737528 |
| Hltf          | chr3  | 20057811  | 20118490  | ENSMUSG00<br>000002428 | -2.2558393 | -1.1736643 |
| Adam8         | chr7  | 139978932 | 139992562 | ENSMUSG00<br>000025473 | -2.2544768 | -1.1727927 |
| Rtn2          | chr7  | 19282662  | 19296164  | ENSMUSG00<br>000030401 | -2.253361  | -1.1720785 |
| Ifitm5        | chr7  | 140948963 | 140950239 | ENSMUSG00<br>000025489 | -2.2527792 | -1.171706  |
| Taf3          | chr2  | 9914552   | 10048596  | ENSMUSG00<br>000025782 | -2.2525828 | -1.1715801 |
| Mill2         | chr7  | 18839966  | 18858654  | ENSMUSG00<br>000040987 | -2.2500577 | -1.1699619 |
| Bbx           | chr16 | 50191844  | 50432390  | ENSMUSG00<br>000022641 | -2.2480035 | -1.1686443 |
| Al607873      | chr1  | 173723430 | 173741809 | ENSMUSG00<br>000073490 | -2.2465026 | -1.1676807 |
| Sfta2         | chr17 | 35601549  | 35650571  | ENSMUSG00<br>000090509 | -2.24391   | -1.1660148 |
| Pbld1         | chr10 | 63061582  | 63077962  | ENSMUSG00<br>000020072 | -2.2421794 | -1.1649017 |
| Chd2          | chr7  | 73426691  | 73541746  | ENSMUSG00<br>000078671 | -2.2417026 | -1.1645949 |
| Zfp366        | chr13 | 99184823  | 99247037  | ENSMUSG00<br>000050919 | -2.2384803 | -1.1625197 |
| Rhoq          | chr17 | 86963082  | 87000069  | ENSMUSG00<br>000024143 | -2.2378101 | -1.1620877 |
| Clspn         | chr4  | 126556935 | 126593903 | ENSMUSG00<br>000042489 | -2.2372658 | -1.1617367 |
| Tnfaip8       | chr18 | 49979427  | 50107173  | ENSMUSG00<br>000062210 | -2.23612   | -1.1609976 |
| Zfp839        | chr12 | 110850279 | 110869998 | ENSMUSG00              | -2.236047  | -1.1609505 |

|            |       |           |           |                        |            |            |
|------------|-------|-----------|-----------|------------------------|------------|------------|
|            |       |           |           | 000021271              |            |            |
| Dgkg       | chr16 | 22468461  | 22657221  | ENSMUSG00<br>000022861 | -2.235708  | -1.1607318 |
| Kif21b     | chr1  | 136131389 | 136177998 | ENSMUSG00<br>000041642 | -2.2357073 | -1.1607313 |
| Kif11      | chr19 | 37376403  | 37421859  | ENSMUSG00<br>000012443 | -2.2329588 | -1.1589566 |
| Ier5       | chr1  | 155096367 | 155099636 | ENSMUSG00<br>000056708 | -2.2327778 | -1.1588397 |
| Pcgf5      | chr19 | 36379067  | 36456192  | ENSMUSG00<br>000024805 | -2.2296824 | -1.1568382 |
| Gls        | chr1  | 52163448  | 52233232  | ENSMUSG00<br>000026103 | -2.2283795 | -1.1559949 |
| Tank       | chr2  | 61578585  | 61654171  | ENSMUSG00<br>000064289 | -2.2273204 | -1.1553092 |
| Tubgcp5    | chr7  | 55794148  | 55831447  | ENSMUSG00<br>000033790 | -2.2267873 | -1.1549639 |
| Axin2      | chr11 | 108920349 | 108950783 | ENSMUSG00<br>000000142 | -2.226673  | -1.1548897 |
| Capns2     | chr8  | 92901395  | 92902409  | ENSMUSG00<br>000078144 | -2.225779  | -1.1543105 |
| Map3k12    | chr15 | 102497649 | 102517064 | ENSMUSG00<br>000023050 | -2.2253587 | -1.154038  |
| Wdr8       | chr4  | 154142372 | 154167420 | ENSMUSG00<br>000029029 | -2.2237844 | -1.1530169 |
| Pik3cd     | chr4  | 149649168 | 149702571 | ENSMUSG00<br>000039936 | -2.2229142 | -1.1524522 |
| Rpap3      | chr15 | 97675105  | 97705822  | ENSMUSG00<br>000022466 | -2.2194955 | -1.1502318 |
| Ccr1       | chr9  | 123962126 | 123968692 | ENSMUSG00<br>000025804 | -2.2187335 | -1.1497364 |
| Trim56     | chr5  | 137105644 | 137116209 | ENSMUSG00<br>000043279 | -2.2166543 | -1.1483837 |
| Slc18a2    | chr19 | 59260878  | 59296012  | ENSMUSG00<br>000025094 | -2.2146778 | -1.1470969 |
| Icam2      | chr11 | 106377656 | 106388075 | ENSMUSG00<br>000001029 | -2.2146697 | -1.1470916 |
| Cxcl3      | chr5  | 90786103  | 90788086  | ENSMUSG00<br>000029379 | -2.2142735 | -1.1468334 |
| Trim62     | chr4  | 128883580 | 128911328 | ENSMUSG00<br>000041000 | -2.2131896 | -1.146127  |
| Maml2      | chr9  | 13619990  | 13709533  | ENSMUSG00<br>000031925 | -2.2106614 | -1.1444781 |
| Herc1      | chr9  | 66350450  | 66508775  | ENSMUSG00<br>000038664 | -2.2102702 | -1.1442227 |
| Serpina11  | chr12 | 103980243 | 103989957 | ENSMUSG00<br>000063232 | -2.2102413 | -1.1442039 |
| Itpk1      | chr12 | 102568582 | 102704929 | ENSMUSG00<br>000057963 | -2.2094572 | -1.143692  |
| Tpx2       | chr2  | 152847964 | 152895321 | ENSMUSG00<br>000027469 | -2.2093575 | -1.1436269 |
| AC153525.1 | chr10 | 52358767  | 52358853  | ENSMUSG00<br>000097704 | -2.2087483 | -1.1432291 |
| Hspa4l     | chr3  | 40744495  | 40796103  | ENSMUSG00<br>000025757 | -2.2084706 | -1.1430477 |
| Mndal      | chr1  | 173857221 | 173942491 | ENSMUSG00<br>000090272 | -2.207875  | -1.1426585 |
| Rsb1l1     | chr5  | 20893028  | 20951822  | ENSMUSG00<br>000039968 | -2.2074487 | -1.14238   |

|               |       |           |           |                        |            |            |
|---------------|-------|-----------|-----------|------------------------|------------|------------|
| Supt16h       | chr14 | 52160419  | 52197239  | ENSMUSG00<br>000035726 | -2.204101  | -1.1401904 |
| Ankrd11       | chr8  | 122883337 | 122974793 | ENSMUSG00<br>000035569 | -2.2040288 | -1.1401432 |
| Gart          | chr16 | 91621186  | 91646952  | ENSMUSG00<br>000022962 | -2.203144  | -1.1395638 |
| Traf3         | chr12 | 111166370 | 111267153 | ENSMUSG00<br>000021277 | -2.2030127 | -1.1394778 |
| Pou2f1        | chr1  | 165865154 | 166002678 | ENSMUSG00<br>000026565 | -2.2023816 | -1.1390644 |
| Nxn           | chr11 | 76257198  | 76399140  | ENSMUSG00<br>000020844 | -2.201344  | -1.1383846 |
| Pthr1         | chr2  | 32775786  | 32777597  | ENSMUSG00<br>000053746 | -2.2004902 | -1.1378249 |
| 4930595D18Rik | chr12 | 111159850 | 111184491 | ENSMUSG00<br>000083193 | -2.198452  | -1.1364881 |
| Smc1a         | chrX  | 152016428 | 152062694 | ENSMUSG00<br>000041133 | -2.1977663 | -1.1360381 |
| Cars          | chr7  | 143557230 | 143600090 | ENSMUSG00<br>000010755 | -2.1958787 | -1.1347984 |
| Sgcb          | chr5  | 73632749  | 73647713  | ENSMUSG00<br>000029156 | -2.1952136 | -1.1343613 |
| Hirip3        | chr7  | 126861972 | 126865377 | ENSMUSG00<br>000042606 | -2.1950903 | -1.1342803 |
| Ppbp          | chr5  | 90768518  | 90770060  | ENSMUSG00<br>000029372 | -2.1947858 | -1.1340802 |
| Tbc1d10c      | chr19 | 4184358   | 4191047   | ENSMUSG00<br>000040247 | -2.1928709 | -1.1328208 |
| Cdadc1        | chr14 | 59560896  | 59597836  | ENSMUSG00<br>000021982 | -2.1919005 | -1.1321824 |
| Taf7          | chr18 | 37640902  | 37644204  | ENSMUSG00<br>000051316 | -2.1917555 | -1.1320869 |
| AW146020      | chr6  | 81923669  | 81959915  | ENSMUSG00<br>000035125 | -2.1915298 | -1.1319383 |
| Smc6          | chr12 | 11265886  | 11319785  | ENSMUSG00<br>000020608 | -2.1894097 | -1.130542  |
| Lrrrip1       | chr1  | 90998727  | 91128944  | ENSMUSG00<br>000026305 | -2.189378  | -1.130521  |
| Gm17571       | chr9  | 13444034  | 13446753  | ENSMUSG00<br>000090592 | -2.1872213 | -1.1290992 |
| Eif2ak4       | chr2  | 118388618 | 118475234 | ENSMUSG00<br>000005102 | -2.186124  | -1.1283753 |
| Hist1h2ac     | chr13 | 23681467  | 23683948  | ENSMUSG00<br>000069270 | -2.18612   | -1.1283726 |
| Nmrk1         | chr19 | 18631950  | 18652194  | ENSMUSG00<br>000037847 | -2.1859097 | -1.1282339 |
| Fbxw17        | chr13 | 50417864  | 50433780  | ENSMUSG00<br>000037816 | -2.1843927 | -1.1272322 |
| Hist1h3e      | chr13 | 23561534  | 23562369  | ENSMUSG00<br>000069273 | -2.1837537 | -1.1268102 |
| Zfp622        | chr15 | 25984366  | 25998482  | ENSMUSG00<br>000052253 | -2.1825173 | -1.125993  |
| Dok2          | chr14 | 70766036  | 70778495  | ENSMUSG00<br>000022102 | -2.181469  | -1.1252999 |
| Btc           | chr5  | 91357261  | 91402994  | ENSMUSG00<br>000082361 | -2.181236  | -1.1251459 |
| 1700030J22Rik | chr8  | 116969599 | 116978943 | ENSMUSG00<br>000031847 | -2.180441  | -1.1246198 |
| Nedd9         | chr13 | 41309916  | 41487320  | ENSMUSG00              | -2.1792307 | -1.1238189 |

|               |       |           |           |                        |            |            |
|---------------|-------|-----------|-----------|------------------------|------------|------------|
|               |       |           |           | 000021365              |            |            |
| Rbm48         | chr5  | 3583978   | 3596585   | ENSMUSG00<br>000040302 | -2.178708  | -1.1234729 |
| Il1rl2        | chr1  | 40324627  | 40365471  | ENSMUSG00<br>000070942 | -2.1772747 | -1.1225234 |
| Cd244         | chr1  | 171559193 | 171585318 | ENSMUSG00<br>000004709 | -2.1768734 | -1.1222575 |
| Nrm           | chr17 | 35861318  | 35865402  | ENSMUSG00<br>000059791 | -2.176233  | -1.1218331 |
| Ffar2         | chr7  | 30818357  | 30823775  | ENSMUSG00<br>000051314 | -2.1745014 | -1.1206846 |
| Ptpn7         | chr1  | 135132725 | 135145320 | ENSMUSG00<br>000031506 | -2.1731439 | -1.1197836 |
| Sirt4         | chr5  | 115478010 | 115484725 | ENSMUSG00<br>000029524 | -2.173032  | -1.1197095 |
| C030046E11Rik | chr19 | 29522282  | 29606829  | ENSMUSG00<br>000038658 | -2.1721404 | -1.1191173 |
| Fes           | chr7  | 80377758  | 80387946  | ENSMUSG00<br>000053158 | -2.172071  | -1.1190712 |
| Plcd1         | chr9  | 119071527 | 119093496 | ENSMUSG00<br>000010660 | -2.1714191 | -1.1186383 |
| Gm10521       | chr1  | 171895664 | 171898237 | ENSMUSG00<br>000073492 | -2.165103  | -1.1144357 |
| Ear1          | chr14 | 43818765  | 43875517  | ENSMUSG00<br>000072601 | -2.1650088 | -1.1143728 |
| Ccdc125       | chr13 | 100669481 | 100697240 | ENSMUSG00<br>000048924 | -2.1632478 | -1.1131989 |
| Cd248         | chr19 | 5068078   | 5070637   | ENSMUSG00<br>000056481 | -2.1628509 | -1.1129341 |
| Gm20481       | chr17 | 34969912  | 34972136  | ENSMUSG00<br>000092609 | -2.1621861 | -1.1124908 |
| Gtdc1         | chr2  | 44564412  | 44927657  | ENSMUSG00<br>000036890 | -2.1617086 | -1.1121721 |
| Mia2          | chr12 | 59095799  | 59109130  | ENSMUSG00<br>000035349 | -2.161402  | -1.1119674 |
| Fam178a       | chr19 | 44931119  | 44983787  | ENSMUSG00<br>000036097 | -2.1592884 | -1.1105559 |
| Mbtd1         | chr11 | 93885852  | 93946985  | ENSMUSG00<br>000059474 | -2.1568294 | -1.1089121 |
| Sfrs18        | chr4  | 21847583  | 21876475  | ENSMUSG00<br>000028248 | -2.1566331 | -1.1087809 |
| Zdhhc17       | chr10 | 110941782 | 111010066 | ENSMUSG00<br>000035798 | -2.1553915 | -1.1079499 |
| Fen1          | chr19 | 10199132  | 10204169  | ENSMUSG00<br>000024742 | -2.1546073 | -1.107425  |
| Ptk2b         | chr14 | 66153257  | 66281052  | ENSMUSG00<br>000059456 | -2.153717  | -1.1068287 |
| Tbxas1        | chr6  | 38875404  | 39084585  | ENSMUSG00<br>000029925 | -2.1535718 | -1.1067314 |
| Birc2         | chr9  | 7818236   | 7835255   | ENSMUSG00<br>000057367 | -2.1532135 | -1.1064913 |
| Zfp760        | chr17 | 21707741  | 21725636  | ENSMUSG00<br>000067928 | -2.1526418 | -1.1061082 |
| Slc7a2        | chr8  | 40862396  | 40922308  | ENSMUSG00<br>000031596 | -2.152085  | -1.1057352 |
| Dkc1          | chrX  | 75095854  | 75109777  | ENSMUSG00<br>000031403 | -2.1515071 | -1.1053476 |
| Zmym4         | chr4  | 126861939 | 126968135 | ENSMUSG00<br>000042446 | -2.1514664 | -1.1053203 |

|               |       |           |           |                        |            |            |
|---------------|-------|-----------|-----------|------------------------|------------|------------|
| Dcp2          | chr18 | 44380500  | 44424969  | ENSMUSG00<br>000024472 | -2.1514447 | -1.1053057 |
| Mpnd          | chr17 | 56005711  | 56016790  | ENSMUSG00<br>000003199 | -2.1503413 | -1.1045656 |
| Tspan5        | chr3  | 138742195 | 138904433 | ENSMUSG00<br>000028152 | -2.150077  | -1.1043884 |
| A630007B06Rik | chr19 | 56787481  | 56822190  | ENSMUSG00<br>000035173 | -2.1493192 | -1.1038798 |
| 2010002N04Rik | chr18 | 60474193  | 60501983  | ENSMUSG00<br>000038059 | -2.1470115 | -1.10233   |
| Tiam1         | chr16 | 89787111  | 89980080  | ENSMUSG00<br>000002489 | -2.1468778 | -1.1022401 |
| Kcnd1         | chrX  | 7822289   | 7838280   | ENSMUSG00<br>000009731 | -2.1462207 | -1.1017984 |
| Hspbap1       | chr16 | 35770386  | 35828446  | ENSMUSG00<br>000022849 | -2.1449137 | -1.1009196 |
| Zfp362        | chr4  | 128773088 | 128806045 | ENSMUSG00<br>000028799 | -2.144858  | -1.100882  |
| A130050007Rik | chr1  | 137928170 | 137930273 | ENSMUSG00<br>000051480 | -2.1446633 | -1.1007512 |
| Hspa1a        | chr17 | 34969199  | 34972154  | ENSMUSG00<br>000091971 | -2.1441314 | -1.1003933 |
| BC068281      | chr12 | 4843303   | 4856925   | ENSMUSG00<br>000051721 | -2.1439977 | -1.1003034 |
| Tram2         | chr1  | 20996296  | 21079229  | ENSMUSG00<br>000041779 | -2.143946  | -1.1002685 |
| Fos           | chr12 | 85473890  | 85477273  | ENSMUSG00<br>000021250 | -2.1436212 | -1.10005   |
| Gon4l         | chr3  | 88835231  | 88910103  | ENSMUSG00<br>000054199 | -2.1434326 | -1.099923  |
| Slc15a2       | chr16 | 36750178  | 36784962  | ENSMUSG00<br>000022899 | -2.1433206 | -1.0998477 |
| Morc3         | chr16 | 93832121  | 93876072  | ENSMUSG00<br>000039456 | -2.1431332 | -1.0997214 |
| Lta4h         | chr10 | 93453396  | 93484896  | ENSMUSG00<br>000015889 | -2.1416273 | -1.0987074 |
| Def6          | chr17 | 28207778  | 28228608  | ENSMUSG00<br>000002257 | -2.1410663 | -1.0983295 |
| Prg4          | chr1  | 150449412 | 150466165 | ENSMUSG00<br>000006014 | -2.1396163 | -1.097352  |
| Tsr2          | chrX  | 151087094 | 151096543 | ENSMUSG00<br>000025264 | -2.1388257 | -1.0968189 |
| Prkd3         | chr17 | 78949405  | 79020816  | ENSMUSG00<br>000024070 | -2.1383297 | -1.0964844 |
| Pvrl4         | chr1  | 171370099 | 171388598 | ENSMUSG00<br>000006411 | -2.1380186 | -1.0962744 |
| Pim2          | chrX  | 7878262   | 7883432   | ENSMUSG00<br>000031155 | -2.1356812 | -1.0946963 |
| Zbtb45        | chr7  | 13004936  | 13009822  | ENSMUSG00<br>000049600 | -2.1349242 | -1.0941849 |
| Smyd3         | chr1  | 178951960 | 179518041 | ENSMUSG00<br>000055067 | -2.1341047 | -1.093631  |
| Dennd3        | chr15 | 73512560  | 73572242  | ENSMUSG00<br>000036661 | -2.1331248 | -1.0929685 |
| Pola1         | chrX  | 93304767  | 93632155  | ENSMUSG00<br>000006678 | -2.1329465 | -1.0928478 |
| Batf          | chr12 | 85686669  | 85709087  | ENSMUSG00<br>000034266 | -2.1324096 | -1.0924846 |
| Orm3          | chr4  | 63356162  | 63359511  | ENSMUSG00              | -2.1321971 | -1.0923408 |

|           |       |           |           |                        |            |            |
|-----------|-------|-----------|-----------|------------------------|------------|------------|
|           |       |           |           | 000028359              |            |            |
| Hist1h2bh | chr13 | 23542924  | 23543359  | ENSMUSG00<br>000064168 | -2.131986  | -1.0921979 |
| Trim12c   | chr7  | 104338754 | 104353362 | ENSMUSG00<br>000057143 | -2.1316488 | -1.0919697 |
| Kbtbd8    | chr6  | 95117240  | 95129718  | ENSMUSG00<br>000030031 | -2.1313982 | -1.0918001 |
| Apbb1ip   | chr2  | 22774094  | 22875653  | ENSMUSG00<br>000026786 | -2.1303697 | -1.0911038 |
| Casc5     | chr2  | 119047119 | 119105501 | ENSMUSG00<br>000027326 | -2.1277094 | -1.0893011 |
| Notch1    | chr2  | 26457903  | 26516663  | ENSMUSG00<br>000026923 | -2.1276095 | -1.0892334 |
| Tspan32   | chr7  | 143005046 | 143019644 | ENSMUSG00<br>000000244 | -2.1268349 | -1.088708  |
| Nr4a3     | chr4  | 48045153  | 48086447  | ENSMUSG00<br>000028341 | -2.126178  | -1.0882624 |
| Emid1     | chr11 | 5106265   | 5152257   | ENSMUSG00<br>000034164 | -2.1256793 | -1.0879239 |
| Sp4       | chr12 | 118234933 | 118301440 | ENSMUSG00<br>000025323 | -2.1240096 | -1.0867903 |
| Pnpla7    | chr2  | 24976033  | 25054057  | ENSMUSG00<br>000036833 | -2.1235461 | -1.0864754 |
| Tspan17   | chr13 | 54789377  | 54796776  | ENSMUSG00<br>000025875 | -2.1224475 | -1.0857289 |
| Ccdc99    | chr11 | 34809190  | 34833641  | ENSMUSG00<br>000069910 | -2.1220267 | -1.0854428 |
| Rabepk    | chr2  | 34777556  | 34799912  | ENSMUSG00<br>000070953 | -2.1193676 | -1.0836338 |
| Car4      | chr11 | 84957786  | 84966044  | ENSMUSG00<br>000000805 | -2.1187932 | -1.0832428 |
| Usp1      | chr4  | 98923810  | 98935543  | ENSMUSG00<br>000028560 | -2.11708   | -1.0820758 |
| Ifnk      | chr4  | 35152056  | 35154005  | ENSMUSG00<br>000042993 | -2.11564   | -1.081094  |
| Rcn1      | chr2  | 105386291 | 105399319 | ENSMUSG00<br>000005973 | -2.1142895 | -1.080173  |
| Fam175b   | chr7  | 132859225 | 132885114 | ENSMUSG00<br>000030965 | -2.1111314 | -1.0780164 |
| Adam19    | chr11 | 46055992  | 46147343  | ENSMUSG00<br>000011256 | -2.1102989 | -1.0774474 |
| Traf5     | chr1  | 191997430 | 192092559 | ENSMUSG00<br>000026637 | -2.109952  | -1.0772102 |
| Susd1     | chr4  | 59314683  | 59438633  | ENSMUSG00<br>000038578 | -2.1079972 | -1.0758729 |
| Vps13a    | chr19 | 16616763  | 16780822  | ENSMUSG00<br>000046230 | -2.1076298 | -1.0756215 |
| Crem      | chr18 | 3266048   | 3337748   | ENSMUSG00<br>000063889 | -2.104361  | -1.0733823 |
| Arl5c     | chr11 | 97989578  | 97996181  | ENSMUSG00<br>000038352 | -2.1042573 | -1.0733112 |
| Pdcd1lg2  | chr19 | 29410919  | 29471157  | ENSMUSG00<br>000016498 | -2.1041021 | -1.0732048 |
| Adam4     | chr12 | 81419443  | 81421946  | ENSMUSG00<br>000072972 | -2.104045  | -1.0731655 |
| Eif5a2    | chr3  | 28781311  | 28798846  | ENSMUSG00<br>000050192 | -2.104021  | -1.0731491 |
| Gm8369    | chr19 | 11492038  | 11512577  | ENSMUSG00<br>000058470 | -2.103509  | -1.072798  |

|               |       |           |           |                        |            |            |
|---------------|-------|-----------|-----------|------------------------|------------|------------|
| Whamm         | chr7  | 81571292  | 81596836  | ENSMUSG00<br>000045795 | -2.1027052 | -1.0722467 |
| Prpf40a       | chr2  | 53134704  | 53191284  | ENSMUSG00<br>000061136 | -2.102277  | -1.0719528 |
| Zbtb5         | chr4  | 44991242  | 45012412  | ENSMUSG00<br>000049657 | -2.1021264 | -1.0718493 |
| Uhrf1bp1      | chr17 | 27856490  | 27900040  | ENSMUSG00<br>000039512 | -2.1007438 | -1.0709002 |
| Usp35         | chr7  | 97309380  | 97332020  | ENSMUSG00<br>000035713 | -2.0992043 | -1.0698426 |
| Parp1         | chr1  | 180568955 | 180601253 | ENSMUSG00<br>000026496 | -2.098591  | -1.069421  |
| Gfi1b         | chr2  | 28609450  | 28621982  | ENSMUSG00<br>000026815 | -2.0985765 | -1.0694112 |
| Dtwd2         | chr18 | 49696145  | 49755601  | ENSMUSG00<br>000024505 | -2.0981495 | -1.0691174 |
| Sh3kbp1       | chrX  | 159627272 | 159978069 | ENSMUSG00<br>000040990 | -2.0962431 | -1.067806  |
| Ccne1         | chr7  | 38097984  | 38107534  | ENSMUSG00<br>000002068 | -2.095104  | -1.0670218 |
| Cst7          | chr2  | 150570415 | 150578944 | ENSMUSG00<br>000068129 | -2.0950973 | -1.0670173 |
| Ubn1          | chr16 | 5050068   | 5086285   | ENSMUSG00<br>000039473 | -2.0949748 | -1.0669329 |
| Cenpf         | chr1  | 189640599 | 189688086 | ENSMUSG00<br>000026605 | -2.0936134 | -1.065995  |
| Nol8          | chr13 | 49653350  | 49679015  | ENSMUSG00<br>000021392 | -2.0924928 | -1.0652227 |
| Rif1          | chr2  | 52072837  | 52122383  | ENSMUSG00<br>000036202 | -2.0917177 | -1.0646882 |
| B430306N03Rik | chr17 | 48316141  | 48327024  | ENSMUSG00<br>000043740 | -2.0908668 | -1.0641012 |
| Oip5          | chr2  | 119609512 | 119618469 | ENSMUSG00<br>000072980 | -2.090687  | -1.0639771 |
| Pigg          | chr5  | 108312609 | 108349355 | ENSMUSG00<br>000029263 | -2.0906003 | -1.0639173 |
| Pcnx          | chr12 | 81860030  | 82000924  | ENSMUSG00<br>000021140 | -2.0894418 | -1.0631175 |
| Neb           | chr2  | 52136647  | 52338798  | ENSMUSG00<br>000026950 | -2.0886693 | -1.062584  |
| Scaf11        | chr15 | 96411698  | 96460843  | ENSMUSG00<br>000033228 | -2.0886638 | -1.0625803 |
| Arl11         | chr14 | 61309753  | 61311936  | ENSMUSG00<br>000043157 | -2.0881262 | -1.0622089 |
| Iqsec2        | chrX  | 152144268 | 152225236 | ENSMUSG00<br>000041115 | -2.0878406 | -1.0620115 |
| H2-Q7         | chr17 | 35439155  | 35443773  | ENSMUSG00<br>000060550 | -2.087455  | -1.0617452 |
| Iffo1         | chr6  | 125145241 | 125161782 | ENSMUSG00<br>000038271 | -2.0868258 | -1.0613102 |
| E2f8          | chr7  | 48866429  | 48881596  | ENSMUSG00<br>000046179 | -2.0857546 | -1.0605694 |
| Atrx          | chrX  | 105797615 | 105929397 | ENSMUSG00<br>000031229 | -2.0852377 | -1.0602119 |
| Sltm          | chr9  | 70542920  | 70592237  | ENSMUSG00<br>000032212 | -2.0832577 | -1.0588412 |
| Nr1h3         | chr2  | 91184061  | 91202834  | ENSMUSG00<br>000002108 | -2.0831761 | -1.0587848 |
| Rcn3          | chr7  | 45082913  | 45092221  | ENSMUSG00              | -2.0830305 | -1.0586839 |



|               |       |           |           |                        |            |            |
|---------------|-------|-----------|-----------|------------------------|------------|------------|
|               |       |           |           | 000019539              |            |            |
| Gm4767        | chr10 | 81661998  | 81664231  | ENSMUSG00<br>000096856 | -2.082917  | -1.0586053 |
| AC154271.1    | chr13 | 85126999  | 85127514  | ENSMUSG00<br>000096449 | -2.0825899 | -1.0583788 |
| Mtrf1l        | chr10 | 5811887   | 5823910   | ENSMUSG00<br>000019774 | -2.0812657 | -1.0574611 |
| Thap3         | chr4  | 151982639 | 151988997 | ENSMUSG00<br>000039759 | -2.0806794 | -1.0570548 |
| Reps2         | chrX  | 162411954 | 162643649 | ENSMUSG00<br>000040855 | -2.0791576 | -1.055999  |
| Atf7ip        | chr6  | 136608859 | 136610870 | ENSMUSG00<br>000053935 | -2.078103  | -1.0552672 |
| Samd5         | chr10 | 9627259   | 9675208   | ENSMUSG00<br>000060487 | -2.0767536 | -1.0543301 |
| C330027C09Rik | chr16 | 48994185  | 49019709  | ENSMUSG00<br>000033031 | -2.0763125 | -1.0540236 |
| Pi4kb         | chr3  | 94974731  | 95006843  | ENSMUSG00<br>000038861 | -2.0758116 | -1.0536755 |
| Cnr2          | chr4  | 135895394 | 135920207 | ENSMUSG00<br>000062585 | -2.0750055 | -1.0531152 |
| Fam111a       | chr19 | 12545740  | 12589768  | ENSMUSG00<br>000024691 | -2.074983  | -1.0530994 |
| Hbegf         | chr18 | 36504929  | 36515805  | ENSMUSG00<br>000024486 | -2.0747154 | -1.0529134 |
| Atr           | chr9  | 95857597  | 95951644  | ENSMUSG00<br>000032409 | -2.074441  | -1.0527226 |
| Fgd3          | chr13 | 49261554  | 49320311  | ENSMUSG00<br>000037946 | -2.0742362 | -1.0525801 |
| Jak2          | chr19 | 29251828  | 29313080  | ENSMUSG00<br>000024789 | -2.072319  | -1.0512462 |
| 4930570N19Rik | chr14 | 26628407  | 26638183  | ENSMUSG00<br>000090861 | -2.0723128 | -1.0512419 |
| Brca2         | chr5  | 150522630 | 150569746 | ENSMUSG00<br>000041147 | -2.071922  | -1.0509697 |
| Syk           | chr13 | 52583173  | 52648792  | ENSMUSG00<br>000021457 | -2.0717068 | -1.0508199 |
| Pdzd2         | chr15 | 12357054  | 12592556  | ENSMUSG00<br>000022197 | -2.07149   | -1.050669  |
| Rapgef2       | chr3  | 79062516  | 79181340  | ENSMUSG00<br>000062232 | -2.071453  | -1.0506431 |
| Ing5          | chr1  | 93803965  | 93822101  | ENSMUSG00<br>000026283 | -2.0707245 | -1.0501356 |
| Rsf1          | chr7  | 97579896  | 97692782  | ENSMUSG00<br>000035623 | -2.0686405 | -1.0486829 |
| 4632415L05Rik | chr3  | 19894886  | 19895962  | ENSMUSG00<br>000048106 | -2.0676994 | -1.0480264 |
| Pggt1b        | chr18 | 46239949  | 46280850  | ENSMUSG00<br>000024477 | -2.067353  | -1.0477847 |
| A930002H24Rik | chr17 | 63863300  | 63863791  | ENSMUSG00<br>000045506 | -2.0660274 | -1.0468594 |
| Prrc2c        | chr1  | 162673402 | 162740495 | ENSMUSG00<br>000040225 | -2.0649621 | -1.0461154 |
| Noc3l         | chr19 | 38788128  | 38819237  | ENSMUSG00<br>000024999 | -2.0646353 | -1.045887  |
| St8sia4       | chr1  | 95587684  | 95667594  | ENSMUSG00<br>000040710 | -2.0640407 | -1.0454714 |
| Ddhd1         | chr14 | 45593174  | 45658143  | ENSMUSG00<br>000037697 | -2.0622098 | -1.0441911 |

|               |       |           |           |                        |            |            |
|---------------|-------|-----------|-----------|------------------------|------------|------------|
| Phf21a        | chr2  | 92093117  | 92364666  | ENSMUSG00<br>000058318 | -2.0615587 | -1.0437355 |
| Aph1c         | chr9  | 66814994  | 66834726  | ENSMUSG00<br>000053040 | -2.0606704 | -1.0431138 |
| Spink2        | chr5  | 77205107  | 77211471  | ENSMUSG00<br>000053030 | -2.0592809 | -1.0421406 |
| Xpc           | chr6  | 91489305  | 91515884  | ENSMUSG00<br>000030094 | -2.0577333 | -1.041056  |
| F930017D23Rik | chr10 | 43593427  | 43630916  | ENSMUSG00<br>000075184 | -2.0570076 | -1.040547  |
| Hist1h2bn     | chr13 | 21754123  | 21754503  | ENSMUSG00<br>000095217 | -2.0556624 | -1.0396034 |
| Matr3         | chr18 | 35562158  | 35592045  | ENSMUSG00<br>000037236 | -2.0520306 | -1.0370522 |
| Shcbp1        | chr8  | 4735980   | 4779534   | ENSMUSG00<br>000022322 | -2.0513659 | -1.0365849 |
| Rnf144b       | chr13 | 47122720  | 47247991  | ENSMUSG00<br>000038068 | -2.0506132 | -1.0360553 |
| 4922501C03Rik | chr9  | 87189573  | 87255536  | ENSMUSG00<br>000056919 | -2.0499513 | -1.0355897 |
| Lrrc4         | chr6  | 28661831  | 28831747  | ENSMUSG00<br>000049939 | -2.0496845 | -1.0354019 |
| Btk           | chrX  | 134542336 | 134583570 | ENSMUSG00<br>000031264 | -2.049563  | -1.0353162 |
| Vamp4         | chr1  | 162570515 | 162599084 | ENSMUSG00<br>000026696 | -2.04915   | -1.0350256 |
| Hiatl1        | chr13 | 65064663  | 65112982  | ENSMUSG00<br>000038212 | -2.0483873 | -1.0344884 |
| Prmt10        | chr8  | 77549397  | 77581338  | ENSMUSG00<br>000037134 | -2.047826  | -1.0340931 |
| Vegfa         | chr17 | 46016993  | 46032377  | ENSMUSG00<br>000023951 | -2.047303  | -1.0337245 |
| Cep55         | chr19 | 38055025  | 38074425  | ENSMUSG00<br>000024989 | -2.046408  | -1.0330937 |
| Ubac1         | chr2  | 25998543  | 26021747  | ENSMUSG00<br>000036352 | -2.046326  | -1.0330359 |
| Diras2        | chr13 | 52504375  | 52530836  | ENSMUSG00<br>000047842 | -2.0459461 | -1.0327681 |
| Cwc22         | chr2  | 77881159  | 77946375  | ENSMUSG00<br>000027014 | -2.0456884 | -1.0325865 |
| Nuak2         | chr1  | 132316126 | 132333488 | ENSMUSG00<br>000009772 | -2.0452623 | -1.0322859 |
| Pde6d         | chr1  | 86542994  | 86582629  | ENSMUSG00<br>000026239 | -2.0428965 | -1.0306162 |
| Stk19         | chr17 | 34823993  | 34836945  | ENSMUSG00<br>000061207 | -2.042291  | -1.0301883 |
| Rel           | chr11 | 23741514  | 23770970  | ENSMUSG00<br>000020275 | -2.0416565 | -1.0297401 |
| Cyp4f13       | chr17 | 32924688  | 32947402  | ENSMUSG00<br>000024055 | -2.0415304 | -1.029651  |
| Tcf7l2        | chr19 | 55741810  | 55933654  | ENSMUSG00<br>000024985 | -2.0393343 | -1.0280983 |
| Vmn2r26       | chr6  | 124024758 | 124062035 | ENSMUSG00<br>000096630 | -2.038479  | -1.0274932 |
| Dnmbp         | chr19 | 43847967  | 43912392  | ENSMUSG00<br>000025195 | -2.0384405 | -1.0274658 |
| Ksr1          | chr11 | 79013440  | 79146407  | ENSMUSG00<br>000018334 | -2.036764  | -1.0262787 |
| Lgalsl        | chr11 | 20823576  | 20831056  | ENSMUSG00              | -2.0367463 | -1.0262662 |

|               |       |           |           |                        |            |            |
|---------------|-------|-----------|-----------|------------------------|------------|------------|
|               |       |           |           | 000042363              |            |            |
| Bcl2l12       | chr7  | 44991222  | 44998712  | ENSMUSG00<br>000003190 | -2.0364003 | -1.0260212 |
| Rttn          | chr18 | 88971790  | 89131013  | ENSMUSG00<br>000023066 | -2.0361423 | -1.0258384 |
| Pth2r         | chr1  | 65282056  | 65389244  | ENSMUSG00<br>000025946 | -2.0359168 | -1.0256786 |
| Arhgap24      | chr5  | 102481391 | 102897936 | ENSMUSG00<br>000057315 | -2.034551  | -1.0247103 |
| 1810011H11Rik | chr14 | 32785963  | 32817968  | ENSMUSG00<br>000041707 | -2.0343063 | -1.0245368 |
| Ccdc141       | chr2  | 77009902  | 77170636  | ENSMUSG00<br>000044033 | -2.03403   | -1.0243409 |
| Bdp1          | chr13 | 100017994 | 100104070 | ENSMUSG00<br>000049658 | -2.033989  | -1.0243118 |
| Atp2b1        | chr10 | 98915152  | 99026143  | ENSMUSG00<br>000019943 | -2.033333  | -1.0238466 |
| Qk            | chr17 | 10206471  | 10319361  | ENSMUSG00<br>000062078 | -2.032925  | -1.023557  |
| Incenp        | chr19 | 9872297   | 9899533   | ENSMUSG00<br>000024660 | -2.0324593 | -1.0232265 |
| Dip2c         | chr13 | 9276528   | 9668928   | ENSMUSG00<br>000048264 | -2.0321345 | -1.022996  |
| Ing2          | chr8  | 47667178  | 47675556  | ENSMUSG00<br>000063049 | -2.0318732 | -1.0228105 |
| Ncapg         | chr5  | 45669922  | 45700544  | ENSMUSG00<br>000015880 | -2.031689  | -1.0226796 |
| Bap1          | chr14 | 31251489  | 31259929  | ENSMUSG00<br>000021901 | -2.0316665 | -1.0226636 |
| P2ry12        | chr3  | 59216271  | 59262831  | ENSMUSG00<br>000036353 | -2.0305822 | -1.0218935 |
| Slc9a3        | chr13 | 74121515  | 74166064  | ENSMUSG00<br>000036123 | -2.0301027 | -1.0215527 |
| Unc13d        | chr11 | 116062095 | 116077961 | ENSMUSG00<br>000057948 | -2.029697  | -1.0212643 |
| Tmem156       | chr5  | 65063208  | 65091555  | ENSMUSG00<br>000037913 | -2.0294557 | -1.0210929 |
| Rgs2          | chr1  | 143999338 | 144004161 | ENSMUSG00<br>000026360 | -2.028238  | -1.020227  |
| Megf9         | chr4  | 70427065  | 70534995  | ENSMUSG00<br>000039270 | -2.027926  | -1.020005  |
| Fbxo34        | chr14 | 47472561  | 47531962  | ENSMUSG00<br>000037536 | -2.0269277 | -1.0192946 |
| Rasgrp4       | chr7  | 29134854  | 29153961  | ENSMUSG00<br>000030589 | -2.0250292 | -1.0179427 |
| Lrrfip2       | chr9  | 111118111 | 111225668 | ENSMUSG00<br>000032497 | -2.0245547 | -1.0176046 |
| Zc3h12c       | chr9  | 52111985  | 52168111  | ENSMUSG00<br>000035164 | -2.0243697 | -1.0174729 |
| Zcchc11       | chr4  | 108459426 | 108559421 | ENSMUSG00<br>000034610 | -2.0234098 | -1.0167886 |
| Nudt4         | chr10 | 95547007  | 95564167  | ENSMUSG00<br>000020029 | -2.0228515 | -1.0163903 |
| Camk1d        | chr2  | 5293457   | 5714515   | ENSMUSG00<br>000039145 | -2.0220382 | -1.0158103 |
| Klf2          | chr8  | 72319033  | 72321656  | ENSMUSG00<br>000055148 | -2.0220177 | -1.0157957 |
| CT009575.1    | chr17 | 11838602  | 11867561  | ENSMUSG00<br>000095795 | -2.021659  | -1.0155396 |

|               |       |           |           |                        |            |            |
|---------------|-------|-----------|-----------|------------------------|------------|------------|
| Serpind1      | chr16 | 17331371  | 17343575  | ENSMUSG00<br>000022766 | -2.020968  | -1.0150465 |
| Rgs18         | chr1  | 144752683 | 144775435 | ENSMUSG00<br>000026357 | -2.0206094 | -1.0147904 |
| Tet2          | chr3  | 133463679 | 133544390 | ENSMUSG00<br>000040943 | -2.019819  | -1.014226  |
| Zbtb4         | chr11 | 69765912  | 69784023  | ENSMUSG00<br>000018750 | -2.01966   | -1.0141125 |
| Tnfsf13       | chr11 | 69682846  | 69685784  | ENSMUSG00<br>000089669 | -2.0192413 | -1.0138134 |
| Ppwd1         | chr13 | 104205121 | 104228844 | ENSMUSG00<br>000021713 | -2.0185506 | -1.0133197 |
| Top1          | chr2  | 160645888 | 160722764 | ENSMUSG00<br>000070544 | -2.0183747 | -1.013194  |
| Itga1         | chr13 | 114958079 | 115101964 | ENSMUSG00<br>000042284 | -2.0174258 | -1.0125157 |
| Trim39        | chr17 | 36258873  | 36272247  | ENSMUSG00<br>000045409 | -2.0164778 | -1.0118376 |
| Rhd           | chr4  | 134864536 | 134896172 | ENSMUSG00<br>000028825 | -2.0164275 | -1.0118015 |
| Bclaf1        | chr10 | 20312469  | 20342501  | ENSMUSG00<br>000037608 | -2.0159457 | -1.0114567 |
| Dgkh          | chr14 | 78569609  | 78725089  | ENSMUSG00<br>000034731 | -2.01504   | -1.0108085 |
| Terf2ip       | chr8  | 112011359 | 112020528 | ENSMUSG00<br>000033430 | -2.01483   | -1.0106583 |
| A330017A19Rik | chr17 | 46889216  | 46890405  | ENSMUSG00<br>000073388 | -2.0144885 | -1.0104135 |
| St7           | chr6  | 17692933  | 17943025  | ENSMUSG00<br>000029534 | -2.0142505 | -1.010243  |
| Usp33         | chr3  | 152346478 | 152393612 | ENSMUSG00<br>000025437 | -2.0139682 | -1.010041  |
| 1600002K03Rik | chr10 | 80172944  | 80175146  | ENSMUSG00<br>000035595 | -2.0136487 | -1.0098121 |
| Cntln         | chr4  | 84884309  | 85131921  | ENSMUSG00<br>000038070 | -2.0120928 | -1.0086968 |
| Kcng          | chr14 | 61607482  | 61611916  | ENSMUSG00<br>000046168 | -2.0118535 | -1.0085253 |
| Tspyl2        | chrX  | 152336852 | 152342425 | ENSMUSG00<br>000041096 | -2.0117517 | -1.0084522 |
| Tpr           | chr1  | 150392838 | 150449935 | ENSMUSG00<br>000006005 | -2.011366  | -1.0081756 |
| Tmx4          | chr2  | 134594185 | 134644145 | ENSMUSG00<br>000034723 | -2.0110176 | -1.0079257 |
| Tmem229a      | chr6  | 24951141  | 24956125  | ENSMUSG00<br>000048022 | -2.0099196 | -1.0071378 |
| Bag2          | chr1  | 33745484  | 33757794  | ENSMUSG00<br>000042215 | -2.009714  | -1.0069902 |
| Rab11fip2     | chr19 | 59902884  | 59943654  | ENSMUSG00<br>000040022 | -2.0088632 | -1.0063794 |
| AY074887      | chr9  | 54950266  | 54950954  | ENSMUSG00<br>000044820 | -2.0084772 | -1.0061021 |
| Csf1          | chr3  | 107741048 | 107760469 | ENSMUSG00<br>000014599 | -2.0080254 | -1.0057776 |
| Spatc1        | chr15 | 76268089  | 76292572  | ENSMUSG00<br>000049653 | -2.0069206 | -1.0049835 |
| Casp4         | chr9  | 5308828   | 5336783   | ENSMUSG00<br>000033538 | -2.0049856 | -1.0035919 |
| Prkch         | chr12 | 73584797  | 73778185  | ENSMUSG00              | -2.0045698 | -1.0032926 |

|               |       |           |           |                        |            |            |
|---------------|-------|-----------|-----------|------------------------|------------|------------|
|               |       |           |           | 000021108              |            |            |
| Dis3          | chr14 | 99076634  | 99099770  | ENSMUSG00<br>000033166 | -2.0033774 | -1.0024343 |
| Arid5a        | chr1  | 36307733  | 36324029  | ENSMUSG00<br>000037447 | -2.0032508 | -1.002343  |
| B130006D01Rik | chr11 | 95723587  | 95726710  | ENSMUSG00<br>000075596 | -2.0030065 | -1.0021671 |
| Tm4sf19       | chr16 | 32400506  | 32408227  | ENSMUSG00<br>000079625 | -2.0015752 | -1.0011358 |
| Gm13157       | chr4  | 147753974 | 147809788 | ENSMUSG00<br>000078495 | -2.0012002 | -1.0008655 |
| Slc26a9       | chr1  | 131744022 | 131771504 | ENSMUSG00<br>000042268 | 2.0033305  | 1.0024004  |
| Prr15l        | chr11 | 96928104  | 96937830  | ENSMUSG00<br>000047040 | 2.0034976  | 1.0025208  |
| Ttc32         | chr12 | 9029997   | 9036394   | ENSMUSG00<br>000066637 | 2.0035195  | 1.0025367  |
| Rab5b         | chr10 | 128677193 | 128696268 | ENSMUSG00<br>000000711 | 2.003849   | 1.0027738  |
| Ndufb4        | chr16 | 37647170  | 37654453  | ENSMUSG00<br>000022820 | 2.0045412  | 1.003272   |
| Il17d         | chr14 | 57524829  | 57543165  | ENSMUSG00<br>000050222 | 2.0056283  | 1.0040543  |
| Vsig2         | chr9  | 37539255  | 37544205  | ENSMUSG00<br>000001943 | 2.0058694  | 1.0042276  |
| Car5b         | chrX  | 163976822 | 164027997 | ENSMUSG00<br>000031373 | 2.006197   | 1.0044632  |
| Med30         | chr15 | 52712445  | 52730431  | ENSMUSG00<br>000038622 | 2.0066803  | 1.0048108  |
| Mfsd6l        | chr11 | 68556186  | 68558244  | ENSMUSG00<br>000048329 | 2.0067923  | 1.0048913  |
| Foxq1         | chr13 | 31558170  | 31560970  | ENSMUSG00<br>000038415 | 2.0081227  | 1.0058475  |
| Car6          | chr4  | 150187015 | 150201332 | ENSMUSG00<br>000028972 | 2.0082858  | 1.0059646  |
| Batf2         | chr19 | 6140983   | 6172476   | ENSMUSG00<br>000039699 | 2.0091875  | 1.0066122  |
| Slc39a3       | chr10 | 81028538  | 81037426  | ENSMUSG00<br>000046822 | 2.0094051  | 1.0067685  |
| Pgcp          | chr15 | 33083129  | 33594552  | ENSMUSG00<br>000039007 | 2.010199   | 1.0073384  |
| Mrps36        | chr13 | 100735955 | 100744659 | ENSMUSG00<br>000061474 | 2.0107467  | 1.0077314  |
| Mina          | chr16 | 59471775  | 59492461  | ENSMUSG00<br>000022724 | 2.0114548  | 1.0082393  |
| Astn2         | chr4  | 65380803  | 66404611  | ENSMUSG00<br>000028373 | 2.0116014  | 1.0083445  |
| Best3         | chr10 | 116986314 | 117025040 | ENSMUSG00<br>000020169 | 2.0119894  | 1.0086226  |
| Higd2a        | chr13 | 54590207  | 54591158  | ENSMUSG00<br>000025868 | 2.0120745  | 1.0086837  |
| Arhgef19      | chr4  | 141239575 | 141257564 | ENSMUSG00<br>000028919 | 2.0131807  | 1.0094768  |
| Grwd1         | chr7  | 45825227  | 45830944  | ENSMUSG00<br>000053801 | 2.0135837  | 1.0097654  |
| Gabarapl2     | chr8  | 111940703 | 111953612 | ENSMUSG00<br>000031950 | 2.0143023  | 1.0102801  |
| Gm8186        | chr17 | 26098872  | 26099257  | ENSMUSG00<br>000049124 | 2.0156846  | 1.0112699  |

|               |       |           |           |                        |           |           |
|---------------|-------|-----------|-----------|------------------------|-----------|-----------|
| 1110001A16Rik | chr17 | 78916499  | 78921037  | ENSMUSG00<br>000062691 | 2.0160017 | 1.0114968 |
| Cecr5         | chr6  | 120509494 | 120531319 | ENSMUSG00<br>000058979 | 2.016293  | 1.0117054 |
| Ndrp2         | chr14 | 51905271  | 51913488  | ENSMUSG00<br>000004558 | 2.0163357 | 1.0117359 |
| Ptch1         | chr13 | 63511533  | 63565520  | ENSMUSG00<br>000021466 | 2.016942  | 1.0121696 |
| Lass3         | chr7  | 66743504  | 66823693  | ENSMUSG00<br>000030510 | 2.017075  | 1.0122648 |
| Uqcrq         | chr11 | 53427922  | 53430831  | ENSMUSG00<br>000044894 | 2.0171983 | 1.012353  |
| Zc4h2         | chrX  | 95639193  | 95658509  | ENSMUSG00<br>000035062 | 2.0174072 | 1.0125023 |
| Grip1         | chr10 | 119454034 | 120087261 | ENSMUSG00<br>000034813 | 2.0187335 | 1.0134505 |
| 1810027010Rik | chr11 | 69838514  | 69839618  | ENSMUSG00<br>000070394 | 2.0193236 | 1.0138721 |
| Rab30         | chr7  | 92741603  | 92837117  | ENSMUSG00<br>000030643 | 2.0193667 | 1.0139029 |
| Dnajb5        | chr4  | 42949814  | 42959425  | ENSMUSG00<br>000036052 | 2.0201652 | 1.0144732 |
| Fam110c       | chr12 | 31073968  | 31079937  | ENSMUSG00<br>000036136 | 2.020571  | 1.0147631 |
| Apol7c        | chr15 | 77524867  | 77533315  | ENSMUSG00<br>000044309 | 2.021722  | 1.0155847 |
| Mlxipl        | chr5  | 135106891 | 135138382 | ENSMUSG00<br>000005373 | 2.022896  | 1.0164222 |
| Trmt5         | chr12 | 73280410  | 73286711  | ENSMUSG00<br>000034442 | 2.0232325 | 1.0166621 |
| Gm9790        | chr3  | 85915722  | 85916163  | ENSMUSG00<br>000044330 | 2.0234535 | 1.0168197 |
| Mmp15         | chr8  | 95352268  | 95374293  | ENSMUSG00<br>000031790 | 2.0244217 | 1.0175098 |
| Setd4         | chr16 | 93583457  | 93604063  | ENSMUSG00<br>000022948 | 2.0253649 | 1.0181818 |
| Trappc4       | chr9  | 44403761  | 44407548  | ENSMUSG00<br>000032112 | 2.0255497 | 1.0183134 |
| Rfk           | chr19 | 17394043  | 17401349  | ENSMUSG00<br>000024712 | 2.0261776 | 1.0187607 |
| Ccdc107       | chr4  | 43492900  | 43495921  | ENSMUSG00<br>000028461 | 2.0265155 | 1.0190012 |
| Echs1         | chr7  | 140105710 | 140116476 | ENSMUSG00<br>000025465 | 2.026679  | 1.0191176 |
| Uqcr10        | chr11 | 4701973   | 4704342   | ENSMUSG00<br>000059534 | 2.027882  | 1.0199738 |
| 9830001H06Rik | chr2  | 157015799 | 157079254 | ENSMUSG00<br>000055485 | 2.02902   | 1.0207832 |
| Capn8         | chr1  | 182565007 | 182632352 | ENSMUSG00<br>000038599 | 2.0297925 | 1.0213323 |
| Brdt          | chr5  | 107331159 | 107387058 | ENSMUSG00<br>000029279 | 2.0303779 | 1.0217482 |
| Bri3          | chr5  | 144244437 | 144446757 | ENSMUSG00<br>000047843 | 2.031052  | 1.0222273 |
| Hist1h4h      | chr13 | 23531044  | 23531519  | ENSMUSG00<br>000060981 | 2.0334432 | 1.0239247 |
| Mpc2          | chr1  | 165461037 | 165481214 | ENSMUSG00<br>000026568 | 2.0339727 | 1.0243003 |
| Coro2b        | chr9  | 62419492  | 62537044  | ENSMUSG00              | 2.0340784 | 1.0243752 |

|               |       |           |           |                        |           |           |
|---------------|-------|-----------|-----------|------------------------|-----------|-----------|
|               |       |           |           | 000041729              |           |           |
| Cxcl17        | chr7  | 25400053  | 25412886  | ENSMUSG00<br>000060188 | 2.0363812 | 1.0260077 |
| A4galt        | chr15 | 83226726  | 83251774  | ENSMUSG00<br>000047878 | 2.0373461 | 1.0266911 |
| Tex12         | chr9  | 50557148  | 50561268  | ENSMUSG00<br>000032065 | 2.038733  | 1.0276729 |
| St5           | chr7  | 109523911 | 109617147 | ENSMUSG00<br>000031024 | 2.0406806 | 1.0290504 |
| Ttc38         | chr15 | 85832306  | 85858822  | ENSMUSG00<br>000035944 | 2.0412061 | 1.0294218 |
| Tacc2         | chr7  | 130577484 | 130764784 | ENSMUSG00<br>000030852 | 2.0418198 | 1.0298555 |
| Abca8a        | chr11 | 110025634 | 110095978 | ENSMUSG00<br>000041828 | 2.043198  | 1.0308291 |
| Cdc42ep1      | chr15 | 78842647  | 78850902  | ENSMUSG00<br>000049521 | 2.0443807 | 1.0316639 |
| Commd6        | chr14 | 101633766 | 101640686 | ENSMUSG00<br>000075486 | 2.0449188 | 1.0320435 |
| Spint2        | chr7  | 29256331  | 29281977  | ENSMUSG00<br>000074227 | 2.04735   | 1.0337577 |
| Nmnat1        | chr4  | 149467572 | 149485202 | ENSMUSG00<br>000028992 | 2.0474539 | 1.033831  |
| Immp1l        | chr2  | 105904638 | 105965558 | ENSMUSG00<br>000042670 | 2.0478663 | 1.0341215 |
| Ppif          | chr14 | 25694154  | 25700468  | ENSMUSG00<br>000021868 | 2.0480206 | 1.0342302 |
| A4gnt         | chr9  | 99612502  | 99622367  | ENSMUSG00<br>000037953 | 2.0488534 | 1.0348167 |
| Abcb1b        | chr5  | 8798147   | 8866314   | ENSMUSG00<br>000028970 | 2.049092  | 1.0349848 |
| Gstm5         | chr3  | 107895821 | 107898686 | ENSMUSG00<br>000004032 | 2.0493395 | 1.0351591 |
| Mrpl39        | chr16 | 84717576  | 84735742  | ENSMUSG00<br>000022889 | 2.0501025 | 1.035696  |
| Vsig8         | chr1  | 172555938 | 172563717 | ENSMUSG00<br>000049598 | 2.0509741 | 1.0363094 |
| Jagn1         | chr6  | 113442569 | 113448229 | ENSMUSG00<br>000051256 | 2.0520787 | 1.037086  |
| Fam129c       | chr8  | 71597648  | 71607936  | ENSMUSG00<br>000043243 | 2.0522442 | 1.0372024 |
| Marveld1      | chr19 | 42147400  | 42151695  | ENSMUSG00<br>000044345 | 2.0523412 | 1.0372705 |
| 4833439L19Rik | chr13 | 54551218  | 54565435  | ENSMUSG00<br>000025871 | 2.0524523 | 1.0373487 |
| Plxna4        | chr6  | 32145926  | 32588192  | ENSMUSG00<br>000029765 | 2.0534115 | 1.0380228 |
| 1110032A03Rik | chr9  | 50762828  | 50775520  | ENSMUSG00<br>000037971 | 2.0540416 | 1.0384655 |
| Cited4        | chr4  | 120666563 | 120667820 | ENSMUSG00<br>000070803 | 2.05461   | 1.0388646 |
| Esrrb         | chr12 | 86361117  | 86521628  | ENSMUSG00<br>000021255 | 2.0556273 | 1.0395787 |
| Ndufb7        | chr8  | 83566671  | 83571626  | ENSMUSG00<br>000033938 | 2.055916  | 1.0397813 |
| Ndnf          | chr6  | 65671590  | 65706930  | ENSMUSG00<br>000049001 | 2.056216  | 1.0399919 |
| Phldb3        | chr7  | 24611328  | 24629288  | ENSMUSG00<br>000074277 | 2.0565023 | 1.0401927 |

|               |       |           |           |                        |           |           |
|---------------|-------|-----------|-----------|------------------------|-----------|-----------|
| Ppap2c        | chr10 | 79526430  | 79533787  | ENSMUSG00<br>000052151 | 2.056878  | 1.0404563 |
| Aebp1         | chr11 | 5861947   | 5872088   | ENSMUSG00<br>000020473 | 2.057482  | 1.0408798 |
| Mamdc4        | chr2  | 25563115  | 25574845  | ENSMUSG00<br>000026941 | 2.0575533 | 1.0409298 |
| 2610528J11Rik | chr4  | 118526999 | 118530228 | ENSMUSG00<br>000028536 | 2.0590506 | 1.0419793 |
| Pfdn4         | chr2  | 170496428 | 170519123 | ENSMUSG00<br>000052033 | 2.060266  | 1.0428307 |
| 5730528L13Rik | chr4  | 48539935  | 48561919  | ENSMUSG00<br>000039693 | 2.061034  | 1.0433682 |
| 1110001J03Rik | chr6  | 38533502  | 38539449  | ENSMUSG00<br>000019689 | 2.0627456 | 1.0445659 |
| Smcr7         | chr11 | 60728398  | 60732951  | ENSMUSG00<br>000018599 | 2.062788  | 1.0445956 |
| Adhfe1        | chr1  | 9547948   | 9577970   | ENSMUSG00<br>000025911 | 2.063255  | 1.0449222 |
| Sptssb        | chr3  | 69819538  | 69859896  | ENSMUSG00<br>000043461 | 2.0637553 | 1.0452719 |
| Srek1ip1      | chr13 | 104792484 | 104839274 | ENSMUSG00<br>000021716 | 2.0639722 | 1.0454235 |
| Nenf          | chr1  | 191306789 | 191318194 | ENSMUSG00<br>000037499 | 2.065138  | 1.0462382 |
| Pcbd2         | chr13 | 55727368  | 55776830  | ENSMUSG00<br>000021496 | 2.0656059 | 1.046565  |
| Scn1b         | chr7  | 31116525  | 31126945  | ENSMUSG00<br>000019194 | 2.06565   | 1.0465958 |
| Trip10        | chr17 | 57249451  | 57263697  | ENSMUSG00<br>000019487 | 2.066039  | 1.0468676 |
| Slc5a5        | chr8  | 70882889  | 70892757  | ENSMUSG00<br>000000792 | 2.067087  | 1.0475991 |
| Tmem60        | chr5  | 20882191  | 20886870  | ENSMUSG00<br>000045435 | 2.0676148 | 1.0479674 |
| Wdr72         | chr9  | 74110356  | 74283308  | ENSMUSG00<br>000044976 | 2.0676427 | 1.0479869 |
| Decr2         | chr17 | 26081211  | 26090329  | ENSMUSG00<br>000036775 | 2.0699465 | 1.0495934 |
| Phgr1         | chr2  | 118772769 | 118778165 | ENSMUSG00<br>000046804 | 2.070405  | 1.049913  |
| Muc4          | chr16 | 32735886  | 32782391  | ENSMUSG00<br>000079620 | 2.0704846 | 1.0499685 |
| Zfp329        | chr7  | 12804977  | 12818858  | ENSMUSG00<br>000057894 | 2.0711157 | 1.0504081 |
| Zfp791        | chr8  | 85109647  | 85119637  | ENSMUSG00<br>000074194 | 2.0726645 | 1.0514866 |
| Tomm5         | chr4  | 45105208  | 45108114  | ENSMUSG00<br>000078713 | 2.0730898 | 1.0517826 |
| Uqcrfs1       | chr13 | 30540308  | 30545362  | ENSMUSG00<br>000038462 | 2.0730953 | 1.0517864 |
| Mien1         | chr11 | 98437708  | 98438991  | ENSMUSG00<br>000002580 | 2.0733879 | 1.05199   |
| Gm10135       | chr5  | 72965808  | 72974702  | ENSMUSG00<br>000063656 | 2.073881  | 1.0523331 |
| Pskh1         | chr8  | 105900441 | 105931778 | ENSMUSG00<br>000048310 | 2.0738816 | 1.0523336 |
| Cbr1          | chr16 | 93607837  | 93610505  | ENSMUSG00<br>000051483 | 2.0740795 | 1.0524712 |
| Mblac1        | chr5  | 138194314 | 138195621 | ENSMUSG00              | 2.0741112 | 1.0524932 |



|               |       |           |           |                        |           |           |
|---------------|-------|-----------|-----------|------------------------|-----------|-----------|
|               |       |           |           | 000049285              |           |           |
| Ndufa11       | chr17 | 56717762  | 56724248  | ENSMUSG00<br>000002379 | 2.0742881 | 1.0526164 |
| Abhd14b       | chr9  | 106448640 | 106452915 | ENSMUSG00<br>000042073 | 2.0743532 | 1.0526617 |
| Ldhb          | chr6  | 142490249 | 142507957 | ENSMUSG00<br>000030246 | 2.074458  | 1.0527344 |
| Cox6b1        | chr7  | 30616974  | 30626151  | ENSMUSG00<br>000036751 | 2.0745258 | 1.0527816 |
| Ces2g         | chr8  | 104961718 | 104969537 | ENSMUSG00<br>000031877 | 2.0753822 | 1.0533772 |
| Trmu          | chr15 | 85879312  | 85897394  | ENSMUSG00<br>000022386 | 2.0756438 | 1.053559  |
| Cdkn2c        | chr4  | 109660876 | 109667189 | ENSMUSG00<br>000028551 | 2.0767925 | 1.054357  |
| Magi2         | chr5  | 19227046  | 20704798  | ENSMUSG00<br>000040003 | 2.0769536 | 1.054469  |
| Phb           | chr11 | 95666957  | 95680773  | ENSMUSG00<br>000038845 | 2.0773554 | 1.054748  |
| Usp20         | chr2  | 30982279  | 31023586  | ENSMUSG00<br>000026854 | 2.0773652 | 1.0547549 |
| Cd300e        | chr11 | 115051917 | 115062177 | ENSMUSG00<br>000048498 | 2.078167  | 1.0553116 |
| Acy3          | chr19 | 3986661   | 3990007   | ENSMUSG00<br>000024866 | 2.0783422 | 1.0554333 |
| S1pr5         | chr9  | 21242912  | 21248443  | ENSMUSG00<br>000045087 | 2.080222  | 1.0567374 |
| Gna11         | chr10 | 81528724  | 81545190  | ENSMUSG00<br>000034781 | 2.0803006 | 1.056792  |
| Adm           | chr7  | 110627669 | 110629819 | ENSMUSG00<br>000030790 | 2.080871  | 1.0571876 |
| 2300009A05Rik | chr9  | 63394447  | 63399244  | ENSMUSG00<br>000032403 | 2.0809693 | 1.0572557 |
| Tmem63b       | chr17 | 45660171  | 45686905  | ENSMUSG00<br>000036026 | 2.081056  | 1.0573158 |
| Lgals12       | chr19 | 7596660   | 7607193   | ENSMUSG00<br>000024972 | 2.0824924 | 1.0583112 |
| Smarcd3       | chr5  | 24590818  | 24602012  | ENSMUSG00<br>000028949 | 2.083278  | 1.0588553 |
| Ccdc122       | chr14 | 77036772  | 77112257  | ENSMUSG00<br>000034795 | 2.0843816 | 1.0596194 |
| Cnn3          | chr3  | 121426541 | 121458205 | ENSMUSG00<br>000053931 | 2.0853705 | 1.0603037 |
| Wdr73         | chr7  | 80890723  | 80901269  | ENSMUSG00<br>000025722 | 2.0861223 | 1.0608237 |
| Cd27          | chr6  | 125232622 | 125237010 | ENSMUSG00<br>000030336 | 2.087267  | 1.0616151 |
| Pdzd7         | chr19 | 45026906  | 45046614  | ENSMUSG00<br>000074818 | 2.0878267 | 1.0620021 |
| Capn13        | chr17 | 73306464  | 73399296  | ENSMUSG00<br>000043705 | 2.0890088 | 1.0628185 |
| Fuk           | chr8  | 110882463 | 110902459 | ENSMUSG00<br>000033703 | 2.090814  | 1.0640647 |
| 2510002D24Rik | chr16 | 18836578  | 18840158  | ENSMUSG00<br>000071632 | 2.0918765 | 1.0647976 |
| Unc119b       | chr5  | 115122550 | 115134975 | ENSMUSG00<br>000046562 | 2.0934174 | 1.06586   |
| Ift172        | chr5  | 31253280  | 31291114  | ENSMUSG00<br>000038564 | 2.0958524 | 1.0675371 |

|               |       |           |           |                        |           |           |
|---------------|-------|-----------|-----------|------------------------|-----------|-----------|
| Fabp2         | chr3  | 122895072 | 122899506 | ENSMUSG00<br>000023057 | 2.096065  | 1.0676835 |
| Tysnd1        | chr10 | 61695514  | 61702773  | ENSMUSG00<br>000020087 | 2.0974898 | 1.0686638 |
| Mki67ip       | chr1  | 118321839 | 118333822 | ENSMUSG00<br>000026377 | 2.097557  | 1.0687101 |
| Ms4a7         | chr19 | 11321039  | 11336146  | ENSMUSG00<br>000024672 | 2.0986733 | 1.0694776 |
| Dnaaf1        | chr8  | 119575235 | 119598454 | ENSMUSG00<br>000031831 | 2.1003854 | 1.0706542 |
| Mpg           | chr11 | 32226505  | 32232700  | ENSMUSG00<br>000020287 | 2.1011586 | 1.0711851 |
| Bnip1         | chr17 | 26781079  | 26792565  | ENSMUSG00<br>000024191 | 2.1023278 | 1.0719876 |
| Creb3         | chr4  | 43562332  | 43567060  | ENSMUSG00<br>000028466 | 2.1023588 | 1.0720088 |
| Aldob         | chr4  | 49535995  | 49549546  | ENSMUSG00<br>000028307 | 2.1035032 | 1.072794  |
| Hcfc1r1       | chr17 | 23673596  | 23675227  | ENSMUSG00<br>000023904 | 2.1035943 | 1.0728564 |
| Gm10197       | chr19 | 53371566  | 53371766  | ENSMUSG00<br>000067085 | 2.1039245 | 1.0730829 |
| Mrpl51        | chr6  | 125191801 | 125195583 | ENSMUSG00<br>000030335 | 2.1040936 | 1.0731988 |
| Timp3         | chr10 | 86300372  | 86349506  | ENSMUSG00<br>000020044 | 2.1048517 | 1.0737187 |
| Aldh6a1       | chr12 | 84430723  | 84450950  | ENSMUSG00<br>000021238 | 2.1054165 | 1.0741057 |
| Gm16253       | chr3  | 96576984  | 96580663  | ENSMUSG00<br>000087610 | 2.1071    | 1.0752589 |
| Mbl1          | chr14 | 41151456  | 41158959  | ENSMUSG00<br>000037780 | 2.1088915 | 1.0764849 |
| Hist2h2be     | chr3  | 96221121  | 96223738  | ENSMUSG00<br>000068854 | 2.1107569 | 1.0777605 |
| Lrrc29        | chr8  | 105312341 | 105326276 | ENSMUSG00<br>000041679 | 2.1121142 | 1.0786879 |
| Zfp939        | chr7  | 39449518  | 39474335  | ENSMUSG00<br>000030424 | 2.1121254 | 1.0786954 |
| Aldh4a1       | chr4  | 139622866 | 139649690 | ENSMUSG00<br>000028737 | 2.1148763 | 1.0805733 |
| 1110007C09Rik | chr13 | 49202951  | 49216026  | ENSMUSG00<br>000037960 | 2.1151514 | 1.080761  |
| Sparc         | chr11 | 55394500  | 55420080  | ENSMUSG00<br>000018593 | 2.1152122 | 1.0808024 |
| Lnx1          | chr5  | 74592446  | 74702911  | ENSMUSG00<br>000029228 | 2.116567  | 1.0817261 |
| Nop10         | chr2  | 112261926 | 112263269 | ENSMUSG00<br>000027133 | 2.116776  | 1.0818686 |
| P4ha2         | chr11 | 54100095  | 54131665  | ENSMUSG00<br>000018906 | 2.1181393 | 1.0827974 |
| Rxrb          | chr17 | 34031812  | 34038393  | ENSMUSG00<br>000039656 | 2.1182334 | 1.0828617 |
| Noxa1         | chr2  | 25085667  | 25095149  | ENSMUSG00<br>000036805 | 2.118619  | 1.0831242 |
| Apoa1bp       | chr3  | 88056523  | 88058495  | ENSMUSG00<br>000028070 | 2.1195323 | 1.083746  |
| Gkn2          | chr6  | 87373365  | 87379494  | ENSMUSG00<br>000030049 | 2.1211653 | 1.084857  |
| Mansc1        | chr6  | 134609210 | 134632488 | ENSMUSG00              | 2.1213202 | 1.0849624 |

|               |       |           |           |                        |           |           |
|---------------|-------|-----------|-----------|------------------------|-----------|-----------|
|               |       |           |           | 000032718              |           |           |
| Acot13        | chr13 | 24817948  | 24831517  | ENSMUSG00<br>000006717 | 2.1219878 | 1.0854163 |
| Ccdc24        | chr4  | 117866524 | 117872557 | ENSMUSG00<br>000078588 | 2.1223311 | 1.0856497 |
| Frem2         | chr3  | 53513939  | 53657355  | ENSMUSG00<br>000037016 | 2.1228132 | 1.0859774 |
| Nt5c          | chr11 | 115490420 | 115491862 | ENSMUSG00<br>000020736 | 2.1247368 | 1.0872841 |
| Tmem170       | chr8  | 111864898 | 111876675 | ENSMUSG00<br>000031953 | 2.1258368 | 1.0880308 |
| Gng13         | chr17 | 25717171  | 25719406  | ENSMUSG00<br>000025739 | 2.1265287 | 1.0885004 |
| Gkn1          | chr6  | 87345653  | 87350915  | ENSMUSG00<br>000030050 | 2.1279962 | 1.0894957 |
| Wnt4          | chr4  | 137277489 | 137299726 | ENSMUSG00<br>000036856 | 2.1283615 | 1.0897433 |
| Gstt3         | chr10 | 75774115  | 75781414  | ENSMUSG00<br>000001665 | 2.1297421 | 1.0906787 |
| Fam96b        | chr8  | 104639839 | 104641965 | ENSMUSG00<br>000031879 | 2.1303496 | 1.0910902 |
| Ptpla         | chr2  | 13975563  | 14056135  | ENSMUSG00<br>000063275 | 2.133688  | 1.0933492 |
| Cxcl14        | chr13 | 56288647  | 56296551  | ENSMUSG00<br>000021508 | 2.1345916 | 1.09396   |
| Zfp708        | chr13 | 67069400  | 67097976  | ENSMUSG00<br>000058883 | 2.1346986 | 1.0940324 |
| Uqcr11        | chr10 | 80402997  | 80406830  | ENSMUSG00<br>000020163 | 2.1348255 | 1.0941181 |
| Tsku          | chr7  | 98350668  | 98361328  | ENSMUSG00<br>000049580 | 2.135456  | 1.0945442 |
| Dnajb2        | chr1  | 75236465  | 75244804  | ENSMUSG00<br>000026203 | 2.1382117 | 1.0964048 |
| Tbcc          | chr17 | 46890621  | 46892463  | ENSMUSG00<br>000036430 | 2.1391256 | 1.0970212 |
| Duox2         | chr2  | 122279247 | 122298165 | ENSMUSG00<br>000068452 | 2.139948  | 1.0975757 |
| Gm4953        | chr1  | 159168157 | 159168642 | ENSMUSG00<br>000061992 | 2.1431022 | 1.0997006 |
| Aplp1         | chr7  | 30434981  | 30445582  | ENSMUSG00<br>000006651 | 2.1451814 | 1.1010997 |
| 1700030K09Rik | chr8  | 72443880  | 72461001  | ENSMUSG00<br>000052794 | 2.146299  | 1.101851  |
| 2310039H08Rik | chr17 | 46772635  | 46773407  | ENSMUSG00<br>000062619 | 2.146634  | 1.1020763 |
| Mamld1        | chrX  | 71050256  | 71156056  | ENSMUSG00<br>000059401 | 2.1474028 | 1.1025928 |
| Tst           | chr15 | 78399556  | 78405859  | ENSMUSG00<br>000044986 | 2.147533  | 1.1026802 |
| Wtip          | chr7  | 34109543  | 34133268  | ENSMUSG00<br>000036459 | 2.1479204 | 1.1029404 |
| Bin1          | chr18 | 32377217  | 32435736  | ENSMUSG00<br>000024381 | 2.1481452 | 1.1030915 |
| Slc2a12       | chr10 | 22645011  | 22704285  | ENSMUSG00<br>000037490 | 2.1496506 | 1.1041021 |
| Nipal1        | chr5  | 72647796  | 72671078  | ENSMUSG00<br>000067219 | 2.1498005 | 1.1042029 |
| Krt78         | chr15 | 101946004 | 101954287 | ENSMUSG00<br>000050463 | 2.1510386 | 1.1050335 |

|            |       |           |           |                        |           |           |
|------------|-------|-----------|-----------|------------------------|-----------|-----------|
| Ngfrap1    | chrX  | 136270253 | 136271978 | ENSMUSG00<br>000046432 | 2.152266  | 1.1058564 |
| Rpusd3     | chr6  | 113415319 | 113419348 | ENSMUSG00<br>000051169 | 2.1525145 | 1.106023  |
| Stxbp1     | chr2  | 32787602  | 32847239  | ENSMUSG00<br>000026797 | 2.1540673 | 1.1070633 |
| Hint3      | chr10 | 30608141  | 30618479  | ENSMUSG00<br>000019791 | 2.1558657 | 1.1082673 |
| Esrrg      | chr1  | 187608791 | 188214885 | ENSMUSG00<br>000026610 | 2.157046  | 1.109057  |
| Gpx2       | chr12 | 76792335  | 76795554  | ENSMUSG00<br>000042808 | 2.1576743 | 1.109477  |
| Kdelc1     | chr1  | 44091463  | 44118808  | ENSMUSG00<br>000026047 | 2.1580722 | 1.1097431 |
| Hrsp12     | chr15 | 34484021  | 34495255  | ENSMUSG00<br>000022323 | 2.1580937 | 1.1097575 |
| Ndufa6     | chr15 | 82350139  | 82354291  | ENSMUSG00<br>000022450 | 2.1583526 | 1.1099305 |
| Hadh       | chr3  | 131233419 | 131272101 | ENSMUSG00<br>000027984 | 2.1595473 | 1.110729  |
| Mogat1     | chr1  | 78510991  | 78538173  | ENSMUSG00<br>000012187 | 2.1603851 | 1.1112885 |
| St6gal2    | chr17 | 55445382  | 55514581  | ENSMUSG00<br>000024172 | 2.161429  | 1.1119854 |
| Hsd17b13   | chr5  | 103955440 | 103977410 | ENSMUSG00<br>000034528 | 2.1627119 | 1.1128415 |
| Snap47     | chr11 | 59407134  | 59451186  | ENSMUSG00<br>000009894 | 2.1634536 | 1.1133361 |
| Serpinh1   | chr7  | 99345375  | 99353230  | ENSMUSG00<br>000070436 | 2.163972  | 1.1136818 |
| AC242409.1 | chr14 | 19415857  | 19418930  | ENSMUSG00<br>000095280 | 2.1670392 | 1.1157253 |
| Asb1       | chr1  | 91540565  | 91559590  | ENSMUSG00<br>000026311 | 2.167182  | 1.1158203 |
| Tm4sf5     | chr11 | 70505244  | 70511178  | ENSMUSG00<br>000018919 | 2.170844  | 1.1182561 |
| Mrpl34     | chr8  | 71464926  | 71465752  | ENSMUSG00<br>000034880 | 2.1714675 | 1.1186705 |
| Ctns       | chr11 | 73183596  | 73199042  | ENSMUSG00<br>000005949 | 2.1734107 | 1.1199608 |
| Ptprr      | chr10 | 116018213 | 116274932 | ENSMUSG00<br>000020151 | 2.1750176 | 1.1210271 |
| Ly6g6c     | chr17 | 35065388  | 35070050  | ENSMUSG00<br>000092586 | 2.1771984 | 1.1224729 |
| Pard6a     | chr8  | 105701154 | 105703493 | ENSMUSG00<br>000005699 | 2.177349  | 1.1225727 |
| Triap1     | chr5  | 115341225 | 115343569 | ENSMUSG00<br>000029535 | 2.1781638 | 1.1231124 |
| Cyb561     | chr11 | 105933702 | 105953336 | ENSMUSG00<br>000019590 | 2.178586  | 1.1233921 |
| COX17      | chr16 | 38347040  | 38362297  | ENSMUSG00<br>000095464 | 2.1786423 | 1.1234293 |
| Dus2l      | chr8  | 105991337 | 106053840 | ENSMUSG00<br>000031901 | 2.1823857 | 1.1259061 |
| Fam195b    | chr11 | 120542888 | 120549727 | ENSMUSG00<br>000061111 | 2.1837046 | 1.1267776 |
| Omp        | chr7  | 98143360  | 98145502  | ENSMUSG00<br>000074006 | 2.1840534 | 1.1270081 |
| Zfhx2      | chr14 | 55060262  | 55092324  | ENSMUSG00              | 2.1841116 | 1.1270466 |

|               |       |           |           |                        |           |           |
|---------------|-------|-----------|-----------|------------------------|-----------|-----------|
|               |       |           |           | 000040721              |           |           |
| Neurl1b       | chr17 | 26414965  | 26446338  | ENSMUSG00<br>000034413 | 2.185387  | 1.1278887 |
| 2410015M20Rik | chr17 | 56607452  | 56609771  | ENSMUSG00<br>000049760 | 2.1871479 | 1.1290507 |
| Chga          | chr12 | 102554969 | 102565027 | ENSMUSG00<br>000021194 | 2.1932092 | 1.1330434 |
| Pla2g4f       | chr2  | 120299957 | 120314165 | ENSMUSG00<br>000046971 | 2.1932154 | 1.1330475 |
| H2-Ob         | chr17 | 34238903  | 34245907  | ENSMUSG00<br>000041538 | 2.194581  | 1.1339455 |
| Neurl2        | chr2  | 164830732 | 164833456 | ENSMUSG00<br>000039873 | 2.1951401 | 1.134313  |
| Gdpd1         | chr11 | 87033867  | 87074062  | ENSMUSG00<br>000061666 | 2.1954257 | 1.1345007 |
| Prkar1b       | chr5  | 139017306 | 139150001 | ENSMUSG00<br>000025855 | 2.195668  | 1.1346599 |
| Gm498         | chr7  | 143866871 | 143897506 | ENSMUSG00<br>000031085 | 2.1966214 | 1.1352862 |
| Tph1          | chr7  | 46647130  | 46672537  | ENSMUSG00<br>000040046 | 2.1971328 | 1.1356221 |
| Amotl1        | chr9  | 14541966  | 14615483  | ENSMUSG00<br>000013076 | 2.2009194 | 1.1381063 |
| Grcc10        | chr6  | 124739183 | 124741374 | ENSMUSG00<br>000072772 | 2.202917  | 1.1394153 |
| 4930503L19Rik | chr18 | 70453140  | 70472480  | ENSMUSG00<br>000044906 | 2.2030115 | 1.139477  |
| Snrpd3        | chr10 | 75518042  | 75535440  | ENSMUSG00<br>000020180 | 2.2030199 | 1.1394825 |
| Ankra2        | chr13 | 98263158  | 98274750  | ENSMUSG00<br>000021661 | 2.204172  | 1.1402367 |
| Acacb         | chr5  | 114146535 | 114250761 | ENSMUSG00<br>000042010 | 2.2042413 | 1.1402822 |
| BC001981      | chr13 | 100108035 | 100108337 | ENSMUSG00<br>000097022 | 2.2049627 | 1.1407542 |
| Epn2          | chr11 | 61517249  | 61579687  | ENSMUSG00<br>000001036 | 2.2057586 | 1.1412749 |
| Pex7          | chr10 | 19859929  | 19907689  | ENSMUSG00<br>000020003 | 2.207414  | 1.1423571 |
| Nicn1         | chr9  | 108290448 | 108296498 | ENSMUSG00<br>000032606 | 2.208492  | 1.1430616 |
| Kazn          | chr4  | 142102390 | 142239401 | ENSMUSG00<br>000040606 | 2.2090724 | 1.1434406 |
| Epor          | chr9  | 21958899  | 21963576  | ENSMUSG00<br>000006235 | 2.2114186 | 1.1449721 |
| Gpr31b        | chr17 | 13051321  | 13052280  | ENSMUSG00<br>000071311 | 2.2143164 | 1.1468613 |
| Mex3d         | chr10 | 80380355  | 80387659  | ENSMUSG00<br>000048696 | 2.2148724 | 1.1472236 |
| Sox12         | chr2  | 152393611 | 152398046 | ENSMUSG00<br>000051817 | 2.2187138 | 1.1497235 |
| Matn2         | chr15 | 34306680  | 34436242  | ENSMUSG00<br>000022324 | 2.2191236 | 1.14999   |
| Lime1         | chr2  | 181380078 | 181383628 | ENSMUSG00<br>000090077 | 2.2195494 | 1.1502669 |
| Nrbp2         | chr15 | 76085595  | 76090013  | ENSMUSG00<br>000075590 | 2.219953  | 1.1505291 |
| Slc46a1       | chr11 | 78465697  | 78472059  | ENSMUSG00<br>000020829 | 2.2203658 | 1.1507974 |

|               |       |           |           |                        |           |           |
|---------------|-------|-----------|-----------|------------------------|-----------|-----------|
| Tpmt          | chr13 | 47025170  | 47044737  | ENSMUSG00<br>000021376 | 2.222377  | 1.1521037 |
| Tmem246       | chr4  | 49584506  | 49597876  | ENSMUSG00<br>000039611 | 2.2265012 | 1.1547785 |
| Pigh          | chr12 | 79080673  | 79089670  | ENSMUSG00<br>000021120 | 2.2302284 | 1.1571915 |
| Tuft1         | chr3  | 94612757  | 94658872  | ENSMUSG00<br>000005968 | 2.230925  | 1.1576421 |
| Rfxank        | chr8  | 70130812  | 70139197  | ENSMUSG00<br>000036120 | 2.2315586 | 1.1580517 |
| Isg15         | chr4  | 156199424 | 156200818 | ENSMUSG00<br>000035692 | 2.2320015 | 1.1583381 |
| Rabl2         | chr15 | 89582533  | 89591923  | ENSMUSG00<br>000022621 | 2.2334595 | 1.1592801 |
| Fcrl1         | chr3  | 87376387  | 87392133  | ENSMUSG00<br>000059994 | 2.233503  | 1.1593083 |
| Cd209d        | chr8  | 3871827   | 3878555   | ENSMUSG00<br>000031495 | 2.2340243 | 1.1596448 |
| Hnf4g         | chr3  | 3508030   | 3659775   | ENSMUSG00<br>000017688 | 2.2355556 | 1.1606334 |
| Dbn1          | chr13 | 55473429  | 55488111  | ENSMUSG00<br>000034675 | 2.2365148 | 1.1612524 |
| B3galnt1      | chr3  | 69574186  | 69598861  | ENSMUSG00<br>000043300 | 2.2374487 | 1.1618546 |
| Gata2         | chr6  | 88193891  | 88207030  | ENSMUSG00<br>000015053 | 2.2374866 | 1.1618791 |
| Psca          | chr15 | 74714839  | 74717063  | ENSMUSG00<br>000022598 | 2.2384548 | 1.1625032 |
| B930041F14Rik | chr4  | 155694342 | 155696481 | ENSMUSG00<br>000074738 | 2.2391598 | 1.1629575 |
| Akr1e1        | chr13 | 4590757   | 4609174   | ENSMUSG00<br>000045410 | 2.246202  | 1.1674876 |
| Abi3bp        | chr16 | 56477846  | 56690128  | ENSMUSG00<br>000035258 | 2.2480223 | 1.1686563 |
| Trim47        | chr11 | 116105752 | 116127210 | ENSMUSG00<br>000020773 | 2.2499075 | 1.1698657 |
| 5830454E08Rik | chr9  | 120577346 | 120578072 | ENSMUSG00<br>000052658 | 2.2523038 | 1.1714015 |
| Gstm2         | chr3  | 107981702 | 107986453 | ENSMUSG00<br>000040562 | 2.2547596 | 1.1729736 |
| Nat6          | chr9  | 107578887 | 107584048 | ENSMUSG00<br>000079334 | 2.2570188 | 1.1744184 |
| Wrb           | chr16 | 96145407  | 96157852  | ENSMUSG00<br>000023147 | 2.2591813 | 1.1758001 |
| Actr6         | chr10 | 89711973  | 89732295  | ENSMUSG00<br>000019948 | 2.2593353 | 1.1758983 |
| Rgs6          | chr12 | 82616925  | 83133744  | ENSMUSG00<br>000021219 | 2.2596211 | 1.176081  |
| Bmp2          | chr2  | 133552159 | 133562885 | ENSMUSG00<br>000027358 | 2.2603106 | 1.1765211 |
| Rpl36-ps3     | chr12 | 12911986  | 12912369  | ENSMUSG00<br>000066629 | 2.2622569 | 1.1777627 |
| Fahd2a        | chr2  | 127436215 | 127444565 | ENSMUSG00<br>000027371 | 2.262316  | 1.1778004 |
| Gdpd5         | chr7  | 99381549  | 99460983  | ENSMUSG00<br>000035314 | 2.263746  | 1.1787121 |
| Fstl1         | chr16 | 37776873  | 37836514  | ENSMUSG00<br>000022816 | 2.2638214 | 1.17876   |
| Hpn           | chr7  | 31098725  | 31115290  | ENSMUSG00              | 2.265005  | 1.1795143 |

|               |       |           |           |                        |           |           |
|---------------|-------|-----------|-----------|------------------------|-----------|-----------|
|               |       |           |           | 000001249              |           |           |
| Bmp6          | chr13 | 38345716  | 38499728  | ENSMUSG00<br>000039004 | 2.2660344 | 1.1801697 |
| Rftn2         | chr1  | 55170159  | 55226782  | ENSMUSG00<br>000025978 | 2.2664137 | 1.1804112 |
| Cd320         | chr17 | 33843091  | 33849774  | ENSMUSG00<br>000002308 | 2.2669766 | 1.1807696 |
| 1810063B05Rik | chr8  | 126422501 | 126425434 | ENSMUSG00<br>000051671 | 2.267431  | 1.1810586 |
| Zfp827        | chr8  | 79028437  | 79193766  | ENSMUSG00<br>000071064 | 2.2692347 | 1.1822058 |
| Slc26a10      | chr10 | 127172426 | 127180645 | ENSMUSG00<br>000040441 | 2.26963   | 1.1824571 |
| Fads2         | chr19 | 10064164  | 10101503  | ENSMUSG00<br>000024665 | 2.2713988 | 1.183581  |
| Asb13         | chr13 | 3634032   | 3651774   | ENSMUSG00<br>000033781 | 2.2733052 | 1.1847913 |
| Kcnj2         | chr11 | 111066164 | 111076821 | ENSMUSG00<br>000041695 | 2.2733457 | 1.1848171 |
| Klhl13        | chrX  | 23219271  | 23365082  | ENSMUSG00<br>000036782 | 2.274062  | 1.1852715 |
| Akap12        | chr10 | 4266329   | 4359468   | ENSMUSG00<br>000038587 | 2.2748387 | 1.1857643 |
| Gm17546       | chr15 | 95824459  | 95830072  | ENSMUSG00<br>000078648 | 2.275173  | 1.1859761 |
| Ndufaf3       | chr9  | 108565866 | 108567342 | ENSMUSG00<br>000070283 | 2.277828  | 1.1876588 |
| Tmem39b       | chr4  | 129676355 | 129696838 | ENSMUSG00<br>000053730 | 2.2804203 | 1.1892998 |
| 2810006K23Rik | chr5  | 124328089 | 124341844 | ENSMUSG00<br>000047635 | 2.2819269 | 1.1902525 |
| CR555305.1    | chr19 | 61296902  | 61297069  | ENSMUSG00<br>000095993 | 2.282639  | 1.1907028 |
| Tmem223       | chr19 | 8770996   | 8772475   | ENSMUSG00<br>000075043 | 2.2837744 | 1.1914201 |
| BC022687      | chr12 | 112808975 | 112816245 | ENSMUSG00<br>000037594 | 2.284746  | 1.1920338 |
| Gm10767       | chr13 | 66904914  | 66909236  | ENSMUSG00<br>000074826 | 2.284898  | 1.1921297 |
| Rsad1         | chr11 | 94539798  | 94549255  | ENSMUSG00<br>000039096 | 2.284918  | 1.1921425 |
| CT033750.1    | chr17 | 15566161  | 15566421  | ENSMUSG00<br>000095920 | 2.2850106 | 1.1922008 |
| Clip3         | chr7  | 30291672  | 30308367  | ENSMUSG00<br>000013921 | 2.2855518 | 1.1925424 |
| 0610009B22Rik | chr11 | 51685386  | 51688874  | ENSMUSG00<br>000007777 | 2.2856371 | 1.1925964 |
| Slc10a5       | chr3  | 10331734  | 10335656  | ENSMUSG00<br>000058921 | 2.2861974 | 1.19295   |
| Wdr6          | chr9  | 108572313 | 108578670 | ENSMUSG00<br>000066357 | 2.287337  | 1.193669  |
| 2410066E13Rik | chr6  | 54681772  | 54700406  | ENSMUSG00<br>000038065 | 2.2888734 | 1.1946377 |
| Cyp2s1        | chr7  | 25802475  | 25816913  | ENSMUSG00<br>000040703 | 2.290493  | 1.1956582 |
| Slc3a1        | chr17 | 85028347  | 85064243  | ENSMUSG00<br>000024131 | 2.2905636 | 1.1957026 |
| Itgb1bp1      | chr12 | 21240825  | 21286237  | ENSMUSG00<br>000062352 | 2.2909243 | 1.1959298 |

|               |       |           |           |                        |           |           |
|---------------|-------|-----------|-----------|------------------------|-----------|-----------|
| Chchd10       | chr10 | 75935573  | 75937725  | ENSMUSG00<br>000049422 | 2.2913797 | 1.1962166 |
| Fam83e        | chr7  | 45721212  | 45729492  | ENSMUSG00<br>000054161 | 2.293703  | 1.1976787 |
| Wnk4          | chr11 | 101260567 | 101277409 | ENSMUSG00<br>000035112 | 2.2941802 | 1.1979787 |
| Pdgfb         | chr15 | 79995900  | 80014808  | ENSMUSG00<br>000000489 | 2.2945268 | 1.1981966 |
| Rpusd2        | chr2  | 119034790 | 119039769 | ENSMUSG00<br>000027324 | 2.297884  | 1.2003059 |
| Cntnap5b      | chr1  | 99772765  | 100485942 | ENSMUSG00<br>000067028 | 2.2994142 | 1.2012664 |
| 1810013D10Rik | chr5  | 53267106  | 53283510  | ENSMUSG00<br>000061461 | 2.2995794 | 1.20137   |
| Pnkd          | chr1  | 74284930  | 74353694  | ENSMUSG00<br>000026179 | 2.303162  | 1.2036159 |
| Cyb5d1        | chr11 | 69391925  | 69395631  | ENSMUSG00<br>000044795 | 2.3033419 | 1.2037286 |
| C1qa          | chr4  | 136895917 | 136898803 | ENSMUSG00<br>000036887 | 2.3047624 | 1.204618  |
| Akap2         | chr4  | 57717657  | 57896984  | ENSMUSG00<br>000038729 | 2.3059216 | 1.2053434 |
| Trappc6a      | chr7  | 19508670  | 19516145  | ENSMUSG00<br>000002043 | 2.3064046 | 1.2056456 |
| Fdx1l         | chr9  | 21067520  | 21073514  | ENSMUSG00<br>000079677 | 2.3065007 | 1.2057056 |
| Stbd1         | chr5  | 92603051  | 92606579  | ENSMUSG00<br>000047963 | 2.3065386 | 1.2057294 |
| Gpt           | chr15 | 76696764  | 76699674  | ENSMUSG00<br>000022546 | 2.308147  | 1.2067351 |
| Irf2bp1       | chr7  | 19004065  | 19006761  | ENSMUSG00<br>000044030 | 2.3098671 | 1.2078098 |
| Alkbh2        | chr5  | 114123926 | 114128218 | ENSMUSG00<br>000044339 | 2.310003  | 1.2078948 |
| Copz2         | chr11 | 96849870  | 96861203  | ENSMUSG00<br>000018672 | 2.3112113 | 1.2086492 |
| Pdk4          | chr6  | 5483351   | 5496309   | ENSMUSG00<br>000019577 | 2.311538  | 1.2088531 |
| Clmn          | chr12 | 104763114 | 104865076 | ENSMUSG00<br>000021097 | 2.311857  | 1.2090522 |
| Ddx28         | chr8  | 106009616 | 106011486 | ENSMUSG00<br>000045538 | 2.3123906 | 1.2093852 |
| Foxa3         | chr7  | 19013282  | 19023538  | ENSMUSG00<br>000040891 | 2.3128119 | 1.2096479 |
| Ift43         | chr12 | 86082561  | 86162458  | ENSMUSG00<br>000007867 | 2.3157325 | 1.2114686 |
| Ttll10        | chr4  | 156034840 | 156059344 | ENSMUSG00<br>000029074 | 2.3172615 | 1.2124208 |
| Slc25a23      | chr17 | 57043711  | 57059863  | ENSMUSG00<br>000046329 | 2.3177412 | 1.2127194 |
| Hist1h3d      | chr13 | 23575763  | 23577011  | ENSMUSG00<br>000062808 | 2.3179543 | 1.2128521 |
| Pcbp3         | chr10 | 76761857  | 76961887  | ENSMUSG00<br>000001120 | 2.3199635 | 1.2141021 |
| Lamtor2       | chr3  | 88549819  | 88553074  | ENSMUSG00<br>000028062 | 2.3260877 | 1.2179055 |
| Camk2n1       | chr4  | 138454314 | 138460123 | ENSMUSG00<br>000046447 | 2.3286738 | 1.2195086 |
| Espl1         | chr15 | 102296293 | 102324356 | ENSMUSG00              | 2.3304317 | 1.2205973 |



|               |       |           |           |                        |           |           |
|---------------|-------|-----------|-----------|------------------------|-----------|-----------|
|               |       |           |           | 000058290              |           |           |
| 1110012L19Rik | chrX  | 70385877  | 70389417  | ENSMUSG00<br>000045237 | 2.3340957 | 1.2228637 |
| Gm7866        | chr9  | 72174579  | 72174959  | ENSMUSG00<br>000061390 | 2.3344676 | 1.2230936 |
| Slc25a42      | chr8  | 70184340  | 70212305  | ENSMUSG00<br>000002346 | 2.3351617 | 1.2235224 |
| Tmem147       | chr7  | 30727701  | 30729534  | ENSMUSG00<br>000006315 | 2.3360984 | 1.2241011 |
| Zfp553        | chr7  | 127233061 | 127238179 | ENSMUSG00<br>000045598 | 2.336729  | 1.2244905 |
| 2900010M23Rik | chr17 | 27122663  | 27133916  | ENSMUSG00<br>000024208 | 2.3391187 | 1.225965  |
| Prickle3      | chrX  | 7657260   | 7668186   | ENSMUSG00<br>000031145 | 2.3394678 | 1.2261803 |
| Enox1         | chr14 | 77156763  | 77721760  | ENSMUSG00<br>000022012 | 2.3411162 | 1.2271966 |
| Gm20459       | chr4  | 57568179  | 57896982  | ENSMUSG00<br>000089945 | 2.341396  | 1.227369  |
| Gm14322       | chr2  | 177759288 | 177770472 | ENSMUSG00<br>000078864 | 2.341825  | 1.2276332 |
| Slc25a35      | chr11 | 68968131  | 68974365  | ENSMUSG00<br>000018740 | 2.345087  | 1.2296414 |
| Pacsin3       | chr2  | 91255954  | 91264679  | ENSMUSG00<br>000027257 | 2.345696  | 1.230016  |
| Phyhd1        | chr2  | 30266203  | 30301080  | ENSMUSG00<br>000079484 | 2.3461642 | 1.230304  |
| Fa2h          | chr8  | 111345135 | 111393824 | ENSMUSG00<br>000033579 | 2.3501399 | 1.2327466 |
| Nme3          | chr17 | 24896500  | 24897522  | ENSMUSG00<br>000073435 | 2.3507104 | 1.2330968 |
| Bgn           | chrX  | 73483602  | 73495933  | ENSMUSG00<br>000031375 | 2.3517008 | 1.2337046 |
| Syt7          | chr19 | 10389090  | 10453181  | ENSMUSG00<br>000024743 | 2.3520927 | 1.233945  |
| 2610203C22Rik | chr1  | 9560832   | 9631175   | ENSMUSG00<br>000079671 | 2.352425  | 1.2341487 |
| Psd           | chr19 | 46312087  | 46327156  | ENSMUSG00<br>000037126 | 2.3525252 | 1.2342101 |
| Lgals4        | chr7  | 28833975  | 28841703  | ENSMUSG00<br>000053964 | 2.353375  | 1.2347312 |
| Eya4          | chr10 | 23104168  | 23349895  | ENSMUSG00<br>000010461 | 2.3557742 | 1.2362013 |
| Tepp          | chr8  | 95310566  | 95326323  | ENSMUSG00<br>000090206 | 2.357026  | 1.2369677 |
| Abcc8         | chr7  | 46104523  | 46180033  | ENSMUSG00<br>000040136 | 2.3576453 | 1.2373466 |
| Wfdc2         | chr2  | 164562413 | 164568510 | ENSMUSG00<br>000017723 | 2.357666  | 1.2373594 |
| Aldh5a1       | chr13 | 24907579  | 24937661  | ENSMUSG00<br>000035936 | 2.3602548 | 1.2389426 |
| Slc52a2       | chr15 | 76538943  | 76542130  | ENSMUSG00<br>000022560 | 2.3620758 | 1.2400553 |
| B3gnt9-ps     | chr8  | 105252638 | 105255153 | ENSMUSG00<br>000069920 | 2.3638868 | 1.241161  |
| Mrp63         | chr14 | 57826239  | 57828745  | ENSMUSG00<br>000021967 | 2.3666883 | 1.2428696 |
| Plp           | chr8  | 94674895  | 94696242  | ENSMUSG00<br>000031775 | 2.3686159 | 1.2440443 |

|               |       |           |           |                        |           |           |
|---------------|-------|-----------|-----------|------------------------|-----------|-----------|
| Romo1         | chr2  | 156144039 | 156145797 | ENSMUSG00<br>000067847 | 2.3696723 | 1.2446876 |
| Dohh          | chr10 | 81384428  | 81391560  | ENSMUSG00<br>000078440 | 2.370618  | 1.2452632 |
| Dvl1          | chr4  | 155847402 | 155859303 | ENSMUSG00<br>000029071 | 2.3707445 | 1.2453401 |
| Tmem198b      | chr10 | 128800036 | 128804370 | ENSMUSG00<br>000047090 | 2.3712196 | 1.2456293 |
| Pou2af1       | chr9  | 51213690  | 51240079  | ENSMUSG00<br>000032053 | 2.3717608 | 1.2459586 |
| Hsd17b14      | chr7  | 45554893  | 45567752  | ENSMUSG00<br>000030825 | 2.3736336 | 1.2470973 |
| 1810022K09Rik | chr3  | 14606320  | 14611221  | ENSMUSG00<br>000078784 | 2.3739023 | 1.2472606 |
| Pccb          | chr9  | 100982032 | 101034898 | ENSMUSG00<br>000032527 | 2.375372  | 1.2481534 |
| Vldlr         | chr19 | 27216484  | 27254231  | ENSMUSG00<br>000024924 | 2.37574   | 1.248377  |
| Bcl2l14       | chr6  | 134396318 | 134438736 | ENSMUSG00<br>000030200 | 2.3769937 | 1.2491381 |
| Tff1          | chr17 | 31161396  | 31165053  | ENSMUSG00<br>000024032 | 2.377267  | 1.2493038 |
| Bdh1          | chr16 | 31422280  | 31458901  | ENSMUSG00<br>000046598 | 2.3806412 | 1.2513502 |
| Efemp1        | chr11 | 28853204  | 28926743  | ENSMUSG00<br>000020467 | 2.3810074 | 1.2515721 |
| Pdpx          | chr15 | 78913919  | 78919517  | ENSMUSG00<br>000068221 | 2.3819394 | 1.2521367 |
| AI316807      | chr8  | 22462615  | 22476879  | ENSMUSG00<br>000031534 | 2.3839467 | 1.2533519 |
| Gm5480        | chr16 | 5007316   | 5008306   | ENSMUSG00<br>000096215 | 2.3841581 | 1.25348   |
| Naf1          | chr8  | 66860217  | 66890564  | ENSMUSG00<br>000014907 | 2.3845692 | 1.2537286 |
| Nr1h4         | chr10 | 89454234  | 89533585  | ENSMUSG00<br>000047638 | 2.3858418 | 1.2544984 |
| Gga2          | chr7  | 121986722 | 122021222 | ENSMUSG00<br>000030872 | 2.3868394 | 1.2551014 |
| Tmem106c      | chr15 | 97964229  | 97970286  | ENSMUSG00<br>000052369 | 2.3871238 | 1.2552733 |
| Kcnk3         | chr5  | 30588170  | 30625270  | ENSMUSG00<br>000049265 | 2.3882172 | 1.255934  |
| Meis3         | chr7  | 16175090  | 16186510  | ENSMUSG00<br>000041420 | 2.3893623 | 1.2566257 |
| Dusp28        | chr1  | 92906989  | 92908620  | ENSMUSG00<br>000047067 | 2.392042  | 1.2582426 |
| Oxnad1        | chr14 | 32085374  | 32103202  | ENSMUSG00<br>000021906 | 2.3939624 | 1.2594005 |
| Ndufc1        | chr3  | 51404677  | 51408988  | ENSMUSG00<br>000037152 | 2.395938  | 1.2605906 |
| Mettl20       | chr6  | 149139849 | 149151171 | ENSMUSG00<br>000039958 | 2.4007626 | 1.2634927 |
| Rtn4rl1       | chr11 | 75193783  | 75267769  | ENSMUSG00<br>000045287 | 2.4021673 | 1.2643366 |
| Dnase1l2      | chr17 | 24440081  | 24443105  | ENSMUSG00<br>000024136 | 2.4043589 | 1.2656522 |
| Tmem202       | chr9  | 59518686  | 59525501  | ENSMUSG00<br>000049526 | 2.4053895 | 1.2662705 |
| 2010300C02Rik | chr1  | 37611677  | 37720085  | ENSMUSG00              | 2.4057717 | 1.2664998 |

|                    |       |           |           |                    |           |           |
|--------------------|-------|-----------|-----------|--------------------|-----------|-----------|
|                    |       |           |           | 000026090          |           |           |
| Gstm3              | chr3  | 107942333 | 107969283 | ENSMUSG0000004038  | 2.4062102 | 1.2667627 |
| Acvr2b             | chr9  | 119402444 | 119433501 | ENSMUSG00000061393 | 2.4081528 | 1.2679269 |
| Trp53inp2          | chr2  | 155381059 | 155389850 | ENSMUSG00000038375 | 2.4083674 | 1.2680554 |
| Zfp212             | chr6  | 47920476  | 47932639  | ENSMUSG00000052763 | 2.4110334 | 1.2696517 |
| Gm10250            | chr15 | 5120602   | 5121172   | ENSMUSG00000068706 | 2.413828  | 1.2713228 |
| Ngef               | chr1  | 87476834  | 87573870  | ENSMUSG00000026259 | 2.4150603 | 1.2720592 |
| Casp6              | chr3  | 129901425 | 129914103 | ENSMUSG00000027997 | 2.4187872 | 1.2742839 |
| Zdhhc24            | chr19 | 4878668   | 4885397   | ENSMUSG00000006463 | 2.4216402 | 1.2759845 |
| Ddt                | chr10 | 75771230  | 75773414  | ENSMUSG0000001666  | 2.4216454 | 1.2759876 |
| 1110058L19Rik      | chr1  | 23995939  | 24005656  | ENSMUSG00000026154 | 2.4237986 | 1.2772698 |
| ENSMUSG00000073564 | chr1  | 133131180 | 133131782 | ENSMUSG00000097341 | 2.4261003 | 1.2786392 |
| Spef1              | chr2  | 131170261 | 131187282 | ENSMUSG00000027329 | 2.426802  | 1.2790563 |
| Scml4              | chr10 | 42860370  | 42960780  | ENSMUSG00000044770 | 2.4287593 | 1.2802196 |
| Iah1               | chr12 | 21316392  | 21323605  | ENSMUSG00000062054 | 2.428972  | 1.2803459 |
| Rnf25              | chr1  | 74593748  | 74601397  | ENSMUSG00000026171 | 2.4326339 | 1.2825192 |
| Rps13-ps2          | chr7  | 88530405  | 88530925  | ENSMUSG00000069972 | 2.434382  | 1.2835555 |
| 1700007G11Rik      | chr5  | 98329354  | 98801910  | ENSMUSG00000057816 | 2.4358385 | 1.2844185 |
| Chchd7             | chr4  | 3938888   | 3951046   | ENSMUSG00000042198 | 2.436318  | 1.2847024 |
| Galnt9             | chr5  | 110544345 | 110621382 | ENSMUSG00000033316 | 2.4407768 | 1.2873404 |
| Aldh3a1            | chr11 | 61207537  | 61218421  | ENSMUSG00000019102 | 2.4449234 | 1.2897892 |
| Gprin3             | chr6  | 59352461  | 59426290  | ENSMUSG00000045441 | 2.4463286 | 1.2906182 |
| Siglech            | chr7  | 55768178  | 55778925  | ENSMUSG00000051504 | 2.4481554 | 1.2916951 |
| Kcnj16             | chr11 | 110968033 | 111027968 | ENSMUSG00000051497 | 2.4495697 | 1.2925284 |
| Jmjd5              | chr7  | 125444676 | 125462265 | ENSMUSG00000030752 | 2.4525056 | 1.2942564 |
| Gm4952             | chr19 | 12599974  | 12628251  | ENSMUSG00000071633 | 2.454092  | 1.2951894 |
| Ptprd              | chr4  | 75941238  | 78211961  | ENSMUSG00000028399 | 2.4564404 | 1.2965692 |
| Npnt               | chr3  | 132881745 | 132950291 | ENSMUSG00000040998 | 2.456695  | 1.2967188 |
| AA467197           | chr2  | 122636986 | 122641191 | ENSMUSG00000033213 | 2.4578106 | 1.2973738 |
| 2210404007Rik      | chr10 | 81393051  | 81395392  | ENSMUSG00000078439 | 2.4580681 | 1.2975249 |

|               |       |           |           |                        |           |           |
|---------------|-------|-----------|-----------|------------------------|-----------|-----------|
| Zdhhc23       | chr16 | 43969078  | 43979093  | ENSMUSG00<br>000036304 | 2.4606898 | 1.2990627 |
| A2ld1         | chr14 | 122816223 | 122913757 | ENSMUSG00<br>000041625 | 2.465887  | 1.3021067 |
| S100a1        | chr3  | 90511034  | 90514392  | ENSMUSG00<br>000044080 | 2.468319  | 1.3035288 |
| Mgst2         | chr3  | 51660360  | 51682675  | ENSMUSG00<br>000074604 | 2.47683   | 1.3084948 |
| Rpp25         | chr9  | 57504102  | 57505447  | ENSMUSG00<br>000062309 | 2.4800625 | 1.3103765 |
| Pla2g4b       | chr2  | 120027483 | 120043033 | ENSMUSG00<br>000033852 | 2.4805672 | 1.31067   |
| Cyp2c44       | chr19 | 44005022  | 44029247  | ENSMUSG00<br>000025197 | 2.4839277 | 1.3126231 |
| Zfp11         | chr5  | 129654593 | 129670099 | ENSMUSG00<br>000051034 | 2.4845126 | 1.3129628 |
| Cd72          | chr4  | 43446462  | 43454628  | ENSMUSG00<br>000028459 | 2.4845712 | 1.3129969 |
| Cobl          | chr11 | 12236608  | 12464960  | ENSMUSG00<br>000020173 | 2.4854918 | 1.3135313 |
| Clgn          | chr8  | 83389867  | 83428552  | ENSMUSG00<br>000002190 | 2.486864  | 1.3143276 |
| Tas1r3        | chr4  | 155859268 | 155863362 | ENSMUSG00<br>000029072 | 2.4871066 | 1.3144683 |
| Pstk          | chr7  | 131371141 | 131387839 | ENSMUSG00<br>000063179 | 2.4874477 | 1.3146663 |
| Ugt2a3        | chr5  | 87324972  | 87337195  | ENSMUSG00<br>000035780 | 2.4896727 | 1.3159561 |
| Tada2b        | chr5  | 36473670  | 36484285  | ENSMUSG00<br>000029196 | 2.4903347 | 1.3163397 |
| Nid1          | chr13 | 13437602  | 13512275  | ENSMUSG00<br>000005397 | 2.4903843 | 1.3163685 |
| Def8          | chr8  | 123442986 | 123463270 | ENSMUSG00<br>000001482 | 2.4944446 | 1.3187187 |
| Epb4.115      | chr1  | 119545033 | 119649000 | ENSMUSG00<br>000026383 | 2.4958658 | 1.3195404 |
| Csrp2         | chr10 | 110920177 | 110939599 | ENSMUSG00<br>000020186 | 2.4983668 | 1.3209853 |
| Kcni4         | chr5  | 48389502  | 49524904  | ENSMUSG00<br>000029088 | 2.500155  | 1.3220176 |
| Mllt11        | chr3  | 95219135  | 95228677  | ENSMUSG00<br>000053192 | 2.5008771 | 1.3224342 |
| 1110008J03Rik | chr5  | 120594305 | 120612589 | ENSMUSG00<br>000029600 | 2.5020201 | 1.3230934 |
| 2410124H12Rik | chr16 | 92478743  | 92497365  | ENSMUSG00<br>000051297 | 2.5022123 | 1.3232042 |
| Fkbp6         | chr5  | 135291704 | 135349991 | ENSMUSG00<br>000040013 | 2.5031836 | 1.3237641 |
| Gp1ba         | chr11 | 70639122  | 70642036  | ENSMUSG00<br>000050675 | 2.5040934 | 1.3242884 |
| Gpa33         | chr1  | 166130238 | 166166510 | ENSMUSG00<br>000000544 | 2.508136  | 1.3266156 |
| Laptm4b       | chr15 | 34238026  | 34284295  | ENSMUSG00<br>000022257 | 2.5095327 | 1.3274188 |
| Bik           | chr15 | 83526862  | 83544635  | ENSMUSG00<br>000016758 | 2.5105424 | 1.3279991 |
| Pappa         | chr4  | 65124174  | 65357509  | ENSMUSG00<br>000028370 | 2.512931  | 1.3293711 |
| Clic3         | chr2  | 25456838  | 25458776  | ENSMUSG00              | 2.5197093 | 1.3332573 |

|               |       |           |           |                        |           |           |
|---------------|-------|-----------|-----------|------------------------|-----------|-----------|
|               |       |           |           | 000015093              |           |           |
| Rgnef         | chr13 | 97898595  | 98206165  | ENSMUSG00<br>000021662 | 2.5211604 | 1.3340878 |
| Slc6a9        | chr4  | 117834506 | 117875198 | ENSMUSG00<br>000028542 | 2.5244102 | 1.3359463 |
| Derl3         | chr10 | 75893398  | 75895941  | ENSMUSG00<br>000009092 | 2.5289242 | 1.3385239 |
| Fam195a       | chr17 | 25863698  | 25868738  | ENSMUSG00<br>000025732 | 2.5290139 | 1.3385749 |
| Hebp2         | chr10 | 18540123  | 18546076  | ENSMUSG00<br>000019853 | 2.5297399 | 1.338989  |
| D730039F16Rik | chr2  | 34874396  | 34892132  | ENSMUSG00<br>000026870 | 2.5323513 | 1.3404776 |
| AC116875.1    | chr8  | 57776225  | 57962564  | ENSMUSG00<br>000096914 | 2.5386412 | 1.3440565 |
| Mrgprf        | chr7  | 145300828 | 145309557 | ENSMUSG00<br>000031070 | 2.5435848 | 1.3468632 |
| Stac2         | chr11 | 98036623  | 98053462  | ENSMUSG00<br>000017400 | 2.5437481 | 1.3469558 |
| Map1lc3a      | chr2  | 155276297 | 155278073 | ENSMUSG00<br>000027602 | 2.5478826 | 1.3492987 |
| Gm17384       | chr5  | 62813823  | 62888308  | ENSMUSG00<br>000090326 | 2.5538182 | 1.3526559 |
| Tcf23         | chr5  | 30968677  | 30977018  | ENSMUSG00<br>000006642 | 2.5563443 | 1.3540821 |
| Kcnk5         | chr14 | 20140058  | 20181782  | ENSMUSG00<br>000023243 | 2.5602665 | 1.356294  |
| Clpp          | chr17 | 56990264  | 56996371  | ENSMUSG00<br>000002660 | 2.5603616 | 1.3563476 |
| Glrx5         | chr12 | 105032689 | 105040910 | ENSMUSG00<br>000021102 | 2.5631244 | 1.3579035 |
| Hsd17b10      | chrX  | 152001845 | 152004442 | ENSMUSG00<br>000025260 | 2.5634682 | 1.3580971 |
| Sh2d7         | chr9  | 54538984  | 54545020  | ENSMUSG00<br>000046460 | 2.570883  | 1.3622639 |
| Zfp358        | chr8  | 3493138   | 3497208   | ENSMUSG00<br>000047264 | 2.5756285 | 1.3649246 |
| BC031353      | chr9  | 74953053  | 75032468  | ENSMUSG00<br>000034858 | 2.5840423 | 1.3696297 |
| Ccdc129       | chr6  | 55836895  | 55978735  | ENSMUSG00<br>000037973 | 2.5868003 | 1.3711687 |
| Golt1a        | chr1  | 133309823 | 133323026 | ENSMUSG00<br>000041717 | 2.5910702 | 1.3735482 |
| Tmem80        | chr7  | 141327739 | 141337156 | ENSMUSG00<br>000025505 | 2.5925653 | 1.3743804 |
| Tmprss9       | chr10 | 80879720  | 80899441  | ENSMUSG00<br>000059406 | 2.5931332 | 1.3746963 |
| BC066135      | chr2  | 180277646 | 180289879 | ENSMUSG00<br>000038980 | 2.5986102 | 1.3777403 |
| Sgk2          | chr2  | 162987330 | 163014127 | ENSMUSG00<br>000017868 | 2.5991588 | 1.3780447 |
| Zfp930        | chr8  | 69226343  | 69228980  | ENSMUSG00<br>000059897 | 2.59961   | 1.3782953 |
| Itpkc         | chr7  | 27207172  | 27228628  | ENSMUSG00<br>000003752 | 2.6011004 | 1.3791221 |
| Ppih          | chr4  | 119300010 | 119320546 | ENSMUSG00<br>000060288 | 2.6031795 | 1.3802748 |
| Tmem177       | chr1  | 119907890 | 119913208 | ENSMUSG00<br>000036975 | 2.607784  | 1.3828244 |

|               |       |           |           |                        |           |           |
|---------------|-------|-----------|-----------|------------------------|-----------|-----------|
| Polr3h        | chr15 | 81915030  | 81926213  | ENSMUSG00<br>000022476 | 2.6093264 | 1.3836774 |
| Coq9          | chr8  | 94838321  | 94854895  | ENSMUSG00<br>000031782 | 2.612624  | 1.3854995 |
| Sdhaf1        | chr7  | 30321411  | 30322375  | ENSMUSG00<br>000074211 | 2.6225872 | 1.3909907 |
| Avpi1         | chr19 | 42123273  | 42129059  | ENSMUSG00<br>000018821 | 2.6289148 | 1.3944674 |
| Paqr5         | chr9  | 61953481  | 62026856  | ENSMUSG00<br>000032278 | 2.6335998 | 1.3970361 |
| 9430016H08Rik | chr1  | 57406328  | 57417953  | ENSMUSG00<br>000025971 | 2.6356819 | 1.3981762 |
| Rcan2         | chr17 | 43801851  | 44039516  | ENSMUSG00<br>000039601 | 2.6431499 | 1.4022583 |
| Rarres2       | chr6  | 48569698  | 48572670  | ENSMUSG00<br>000009281 | 2.6436272 | 1.4025187 |
| Grp2          | chr15 | 80623505  | 80650559  | ENSMUSG00<br>000042351 | 2.6447544 | 1.4031337 |
| Npff          | chr15 | 102523843 | 102524621 | ENSMUSG00<br>000023052 | 2.6479683 | 1.4048859 |
| Actr3b        | chr5  | 25759997  | 25850342  | ENSMUSG00<br>000056367 | 2.6500618 | 1.406026  |
| Mcee          | chr7  | 64392645  | 64412121  | ENSMUSG00<br>000033429 | 2.6511707 | 1.4066296 |
| Ndufaf6       | chr4  | 11051045  | 11076205  | ENSMUSG00<br>000050323 | 2.6521556 | 1.4071654 |
| Naprt1        | chr15 | 75890964  | 75894481  | ENSMUSG00<br>000022574 | 2.6566956 | 1.4096329 |
| Ccdc130       | chr8  | 84257795  | 84270380  | ENSMUSG00<br>000004994 | 2.6580317 | 1.4103583 |
| Dnajc22       | chr15 | 99093170  | 99104737  | ENSMUSG00<br>000038009 | 2.6610005 | 1.4119688 |
| Zfp213        | chr17 | 23556769  | 23564226  | ENSMUSG00<br>000071256 | 2.6618347 | 1.412421  |
| Gm561         | chr2  | 144594054 | 144595366 | ENSMUSG00<br>000074754 | 2.6623905 | 1.4127221 |
| Rbm20         | chr19 | 53677306  | 53867080  | ENSMUSG00<br>000043639 | 2.6652222 | 1.4142557 |
| Dhrs11        | chr11 | 84820856  | 84828994  | ENSMUSG00<br>000034449 | 2.6652884 | 1.4142916 |
| Pecr          | chr1  | 72259167  | 72284314  | ENSMUSG00<br>000026189 | 2.6687396 | 1.4161586 |
| Tlr11         | chr14 | 50360502  | 50363662  | ENSMUSG00<br>000051969 | 2.6687799 | 1.4161803 |
| Fah           | chr7  | 84585159  | 84606722  | ENSMUSG00<br>000030630 | 2.671145  | 1.4174583 |
| Fbxl8         | chr8  | 105264648 | 105269326 | ENSMUSG00<br>000033313 | 2.6746378 | 1.4193435 |
| Ccbl1         | chr2  | 30185124  | 30205847  | ENSMUSG00<br>000039648 | 2.691532  | 1.4284276 |
| Vil1          | chr1  | 74409376  | 74435559  | ENSMUSG00<br>000026175 | 2.6930413 | 1.4292364 |
| Sst           | chr16 | 23889581  | 23890844  | ENSMUSG00<br>000004366 | 2.6972346 | 1.431481  |
| Gpd1          | chr15 | 99717515  | 99725005  | ENSMUSG00<br>000023019 | 2.7022157 | 1.4341428 |
| Sfxn3         | chr19 | 45047576  | 45056383  | ENSMUSG00<br>000025212 | 2.7045267 | 1.4353762 |
| Mlycd         | chr8  | 119394878 | 119411102 | ENSMUSG00              | 2.7055311 | 1.4359119 |

|               |       |           |           |                        |           |           |
|---------------|-------|-----------|-----------|------------------------|-----------|-----------|
|               |       |           |           | 000074064              |           |           |
| Stradb        | chr1  | 58973522  | 58995715  | ENSMUSG00<br>000026027 | 2.7081857 | 1.4373267 |
| Tssk4         | chr14 | 55650182  | 55652539  | ENSMUSG00<br>000007591 | 2.7098138 | 1.4381938 |
| Taco1         | chr11 | 106066061 | 106073612 | ENSMUSG00<br>000001983 | 2.7117977 | 1.4392495 |
| Cytl1         | chr5  | 37735519  | 37739820  | ENSMUSG00<br>000062329 | 2.7134593 | 1.4401332 |
| Duoxa2        | chr2  | 122298900 | 122302885 | ENSMUSG00<br>000027225 | 2.71403   | 1.4404367 |
| Atp4b         | chr8  | 13386209  | 13396778  | ENSMUSG00<br>000031449 | 2.7143228 | 1.4405923 |
| 5330417C22Rik | chr3  | 108455694 | 108536526 | ENSMUSG00<br>000040412 | 2.720833  | 1.4440484 |
| Ccr11         | chr9  | 104098138 | 104126643 | ENSMUSG00<br>000079355 | 2.7226179 | 1.4449946 |
| Snx22         | chr9  | 66065176  | 66069731  | ENSMUSG00<br>000039452 | 2.728181  | 1.4479393 |
| Sstr2         | chr11 | 113619342 | 113626005 | ENSMUSG00<br>000047904 | 2.7298198 | 1.4488057 |
| Fabp3         | chr4  | 130308595 | 130315463 | ENSMUSG00<br>000028773 | 2.7301033 | 1.4489555 |
| Ccdc85b       | chr19 | 5456789   | 5457397   | ENSMUSG00<br>000095098 | 2.7324939 | 1.4502182 |
| Igsf23        | chr7  | 19937305  | 19950743  | ENSMUSG00<br>000040498 | 2.736508  | 1.4523361 |
| Gm5294        | chr5  | 138820080 | 138821619 | ENSMUSG00<br>000094504 | 2.7374177 | 1.4528157 |
| Lmbr11        | chr15 | 98903921  | 98918231  | ENSMUSG00<br>000022999 | 2.7389812 | 1.4536394 |
| Pcp411        | chr1  | 171173262 | 171196268 | ENSMUSG00<br>000038370 | 2.739565  | 1.4539468 |
| Car8          | chr4  | 8143367   | 8239041   | ENSMUSG00<br>000041261 | 2.7414615 | 1.4549452 |
| Pcgf1         | chr6  | 83077869  | 83080855  | ENSMUSG00<br>000069678 | 2.7436306 | 1.4560863 |
| Dpm3          | chr3  | 89259358  | 89267079  | ENSMUSG00<br>000042737 | 2.7505424 | 1.4597161 |
| Prss23        | chr7  | 89507785  | 89517586  | ENSMUSG00<br>000039405 | 2.7534835 | 1.4612579 |
| Ephb3         | chr16 | 21204755  | 21223305  | ENSMUSG00<br>000005958 | 2.7684622 | 1.4690849 |
| 0610009020Rik | chr18 | 38250249  | 38262629  | ENSMUSG00<br>000024442 | 2.769955  | 1.4698625 |
| Ckb           | chr12 | 111669355 | 111672338 | ENSMUSG00<br>000001270 | 2.7702496 | 1.470016  |
| B230104I21RIK | chr4  | 154336127 | 154349918 | ENSMUSG00<br>000097871 | 2.7706628 | 1.4702312 |
| Ebpl          | chr14 | 61339763  | 61360445  | ENSMUSG00<br>000021928 | 2.7717288 | 1.4707861 |
| BC003266      | chr4  | 127243784 | 127247809 | ENSMUSG00<br>000042380 | 2.7780836 | 1.47409   |
| Col14a1       | chr15 | 55307750  | 55520803  | ENSMUSG00<br>000022371 | 2.7817338 | 1.4759843 |
| Gstt1         | chr10 | 75783813  | 75798584  | ENSMUSG00<br>000001663 | 2.7929053 | 1.4817667 |
| Cxxc5         | chr18 | 35829818  | 35861687  | ENSMUSG00<br>000046668 | 2.7941852 | 1.4824276 |

|               |       |           |           |                        |           |           |
|---------------|-------|-----------|-----------|------------------------|-----------|-----------|
| Agt           | chr8  | 124556534 | 124569706 | ENSMUSG00<br>000031980 | 2.7948458 | 1.4827687 |
| Chst3         | chr10 | 60181532  | 60219260  | ENSMUSG00<br>000057337 | 2.7963672 | 1.4835538 |
| Spats2        | chr15 | 99126578  | 99213206  | ENSMUSG00<br>000051934 | 2.798197  | 1.4844975 |
| Pate4         | chr9  | 35607093  | 35611935  | ENSMUSG00<br>000032099 | 2.8033025 | 1.4871274 |
| Tmem171       | chr13 | 98686235  | 98694834  | ENSMUSG00<br>000052485 | 2.8034134 | 1.4871845 |
| Capn9         | chr8  | 124576111 | 124618731 | ENSMUSG00<br>000031981 | 2.8158214 | 1.4935558 |
| Tnni3         | chr7  | 4518305   | 4524229   | ENSMUSG00<br>000035458 | 2.8186908 | 1.4950252 |
| Pik3r3        | chr4  | 116221618 | 116303056 | ENSMUSG00<br>000028698 | 2.821643  | 1.4965355 |
| Cd209a        | chr8  | 3743395   | 3748984   | ENSMUSG00<br>000031494 | 2.823917  | 1.4976976 |
| Nt5e          | chr9  | 88327609  | 88372089  | ENSMUSG00<br>000032420 | 2.8267367 | 1.4991375 |
| Gstk1         | chr6  | 42245935  | 42250441  | ENSMUSG00<br>000029864 | 2.8309786 | 1.5013008 |
| Zfp78         | chr7  | 6371364   | 6379491   | ENSMUSG00<br>000055150 | 2.835674  | 1.5036917 |
| 2010107G23Rik | chr10 | 62107655  | 62143920  | ENSMUSG00<br>000020083 | 2.8380163 | 1.5048828 |
| 4930455F23Rik | chr1  | 164275585 | 164287847 | ENSMUSG00<br>000026578 | 2.8575797 | 1.5147938 |
| Chsy3         | chr18 | 59175401  | 59410446  | ENSMUSG00<br>000058152 | 2.8617644 | 1.516905  |
| Ppp1r3e       | chr14 | 54872681  | 54877550  | ENSMUSG00<br>000072494 | 2.8636215 | 1.5178409 |
| Snrpn         | chr7  | 59982495  | 60140219  | ENSMUSG00<br>000000948 | 2.8798215 | 1.5259794 |
| Mzt2          | chr16 | 15848441  | 15863369  | ENSMUSG00<br>000022671 | 2.8862288 | 1.5291857 |
| Tenc1         | chr15 | 102102988 | 102116401 | ENSMUSG00<br>000037003 | 2.887387  | 1.5297645 |
| Atp4a         | chr7  | 30712209  | 30725535  | ENSMUSG00<br>000005553 | 2.8922021 | 1.5321684 |
| D0H4S114      | chr18 | 33437019  | 33464029  | ENSMUSG00<br>000042834 | 2.8927739 | 1.5324535 |
| Slc6a20a      | chr9  | 123636122 | 123678885 | ENSMUSG00<br>000036814 | 2.8964386 | 1.5342801 |
| Rbp2          | chr9  | 98490537  | 98509771  | ENSMUSG00<br>000032454 | 2.9089015 | 1.5404744 |
| Slc16a5       | chr11 | 115462474 | 115474398 | ENSMUSG00<br>000045775 | 2.9163647 | 1.5441711 |
| 1110065P20Rik | chr4  | 124849485 | 124850730 | ENSMUSG00<br>000078570 | 2.919506  | 1.5457243 |
| Krt13         | chr11 | 100117327 | 100121566 | ENSMUSG00<br>000044041 | 2.9221976 | 1.5470537 |
| Akr7a5        | chr4  | 139310744 | 139318426 | ENSMUSG00<br>000028743 | 2.9284666 | 1.5501454 |
| Ces1g         | chr8  | 93302369  | 93337308  | ENSMUSG00<br>000057074 | 2.930828  | 1.5513084 |
| Cideb         | chr14 | 55754045  | 55758458  | ENSMUSG00<br>000022219 | 2.9344273 | 1.5530789 |
| Creb3l4       | chr3  | 90237500  | 90243512  | ENSMUSG00              | 2.9352207 | 1.553469  |



|           |       |           |           |                        |           |           |
|-----------|-------|-----------|-----------|------------------------|-----------|-----------|
|           |       |           |           | 000027938              |           |           |
| O3far1    | chr19 | 38097079  | 38114263  | ENSMUSG00<br>000054200 | 2.9381385 | 1.5549024 |
| Hist2h3c1 | chr3  | 96246685  | 96248509  | ENSMUSG00<br>000093769 | 2.943119  | 1.5573459 |
| Zscan2    | chr7  | 80860920  | 80876516  | ENSMUSG00<br>000038797 | 2.9535546 | 1.5624523 |
| Ttc30b    | chr2  | 75935863  | 75938462  | ENSMUSG00<br>000075273 | 2.9540713 | 1.5627047 |
| Acrbp     | chr6  | 125049689 | 125063267 | ENSMUSG00<br>000072770 | 2.9773786 | 1.5740427 |
| Rhoc      | chr3  | 104789011 | 104794459 | ENSMUSG00<br>000002233 | 2.9774659 | 1.574085  |
| Shh       | chr5  | 28456815  | 28467101  | ENSMUSG00<br>000002633 | 2.9864032 | 1.578409  |
| Svip      | chr7  | 51997165  | 52006018  | ENSMUSG00<br>000074093 | 2.9865367 | 1.5784734 |
| Zfp784    | chr7  | 5034439   | 5038446   | ENSMUSG00<br>000043290 | 2.9928577 | 1.5815237 |
| Rep15     | chr6  | 147032537 | 147033518 | ENSMUSG00<br>000040121 | 2.994468  | 1.5822997 |
| Rdh7      | chr10 | 127884028 | 127888817 | ENSMUSG00<br>000040134 | 2.998362  | 1.5841746 |
| Slc2a10   | chr2  | 165503787 | 165519917 | ENSMUSG00<br>000027661 | 3.0028777 | 1.5863457 |
| Tnfsf13b  | chr8  | 10006843  | 10035441  | ENSMUSG00<br>000031497 | 3.0123005 | 1.5908657 |
| Ccdc101   | chr7  | 126649309 | 126672925 | ENSMUSG00<br>000030714 | 3.0128558 | 1.5911316 |
| Samd12    | chr15 | 53461621  | 53902537  | ENSMUSG00<br>000058656 | 3.0227048 | 1.5958401 |
| Tmem125   | chr4  | 118540941 | 118544044 | ENSMUSG00<br>000050854 | 3.0264804 | 1.597641  |
| Obp2a     | chr2  | 25700043  | 25703326  | ENSMUSG00<br>000062061 | 3.0350718 | 1.6017307 |
| Fam189b   | chr3  | 89183143  | 89189295  | ENSMUSG00<br>000032657 | 3.0452597 | 1.6065652 |
| Hspb1     | chr5  | 135887919 | 135889563 | ENSMUSG00<br>000004951 | 3.0501826 | 1.6088957 |
| Vcam1     | chr3  | 116110020 | 116129688 | ENSMUSG00<br>000027962 | 3.0546408 | 1.6110027 |
| BC017612  | chr9  | 15505487  | 15545260  | ENSMUSG00<br>000058173 | 3.0550609 | 1.6112012 |
| Gpt2      | chr8  | 85492576  | 85527560  | ENSMUSG00<br>000031700 | 3.0552404 | 1.6112859 |
| Apoa1     | chr9  | 46228580  | 46230466  | ENSMUSG00<br>000032083 | 3.0571723 | 1.6121979 |
| Arl16     | chr11 | 120464866 | 120467607 | ENSMUSG00<br>000057594 | 3.058848  | 1.6129884 |
| Spryd4    | chr10 | 128209908 | 128211794 | ENSMUSG00<br>000051346 | 3.0598435 | 1.6134579 |
| Stc2      | chr11 | 31357307  | 31370074  | ENSMUSG00<br>000020303 | 3.0627005 | 1.6148043 |
| Ppargc1a  | chr5  | 51454249  | 51567725  | ENSMUSG00<br>000029167 | 3.063262  | 1.6150688 |
| Hexim2    | chr11 | 103132429 | 103139876 | ENSMUSG00<br>000043372 | 3.067434  | 1.6170323 |
| Fgf1      | chr18 | 38838673  | 38929404  | ENSMUSG00<br>000036585 | 3.067692  | 1.6171536 |

|         |       |           |           |                        |           |           |
|---------|-------|-----------|-----------|------------------------|-----------|-----------|
| Tmem53  | chr4  | 117251951 | 117268582 | ENSMUSG00<br>000048772 | 3.0694802 | 1.6179943 |
| Capn10  | chr1  | 92934376  | 92947941  | ENSMUSG00<br>000026270 | 3.073138  | 1.6197126 |
| Gstt2   | chr10 | 75831845  | 75834881  | ENSMUSG00<br>000033318 | 3.073519  | 1.6198914 |
| Gmpr    | chr13 | 45507444  | 45546382  | ENSMUSG00<br>000000253 | 3.0766742 | 1.6213717 |
| Ovol1   | chr19 | 5549137   | 5560575   | ENSMUSG00<br>000024922 | 3.0814948 | 1.6236304 |
| Kit     | chr5  | 75574916  | 75656722  | ENSMUSG00<br>000005672 | 3.082413  | 1.6240602 |
| Rassf7  | chr7  | 141215860 | 141218658 | ENSMUSG00<br>000038618 | 3.0891023 | 1.6271876 |
| Col6a1  | chr10 | 76708792  | 76726168  | ENSMUSG00<br>000001119 | 3.089706  | 1.6274695 |
| Fitm2   | chr2  | 163466379 | 163472629 | ENSMUSG00<br>000048486 | 3.089977  | 1.6275961 |
| Pradc1  | chr6  | 85446810  | 85451970  | ENSMUSG00<br>000030008 | 3.095669  | 1.6302513 |
| Ntf3    | chr6  | 126101413 | 126166744 | ENSMUSG00<br>000049107 | 3.0963295 | 1.630559  |
| Dlg5    | chr14 | 24133953  | 24245920  | ENSMUSG00<br>000021782 | 3.0991578 | 1.6318762 |
| Fhit    | chr14 | 9550092   | 11162035  | ENSMUSG00<br>000060579 | 3.1083748 | 1.6361605 |
| Cd177   | chr7  | 24743985  | 24760311  | ENSMUSG00<br>000052212 | 3.109967  | 1.6368992 |
| Hsbp111 | chr18 | 80229758  | 80247102  | ENSMUSG00<br>000078963 | 3.1116407 | 1.6376755 |
| Zfyve21 | chr12 | 111814170 | 111828388 | ENSMUSG00<br>000021286 | 3.1143181 | 1.6389164 |
| Oxld1   | chr11 | 120456606 | 120458068 | ENSMUSG00<br>000039670 | 3.1220372 | 1.6424878 |
| Olfm4   | chr14 | 80000302  | 80021930  | ENSMUSG00<br>000022026 | 3.139498  | 1.6505339 |
| Scd1    | chr19 | 44394451  | 44407709  | ENSMUSG00<br>000037071 | 3.141048  | 1.651246  |
| Slamf9  | chr1  | 172475358 | 172478575 | ENSMUSG00<br>000026548 | 3.1410763 | 1.651259  |
| Wrap53  | chr11 | 69561758  | 69580255  | ENSMUSG00<br>000041346 | 3.1426828 | 1.6519966 |
| Isoc2b  | chr7  | 4844959   | 4866193   | ENSMUSG00<br>000052605 | 3.1494575 | 1.6551033 |
| Arhgap8 | chr15 | 84720052  | 84772207  | ENSMUSG00<br>000078954 | 3.1494746 | 1.6551112 |
| Gif     | chr19 | 11747554  | 11763447  | ENSMUSG00<br>000024682 | 3.1539187 | 1.6571455 |
| Dtna    | chr18 | 23415415  | 23659714  | ENSMUSG00<br>000024302 | 3.1547258 | 1.6575146 |
| Adtrp   | chr13 | 41763148  | 41847684  | ENSMUSG00<br>000058022 | 3.1558812 | 1.6580429 |
| Tspan6  | chrX  | 133891068 | 133898429 | ENSMUSG00<br>000067377 | 3.15591   | 1.658056  |
| Qk      | chr17 | 10319945  | 10320229  | ENSMUSG00<br>000044407 | 3.1565719 | 1.6583586 |
| Cx3cl1  | chr8  | 94772009  | 94782423  | ENSMUSG00<br>000031778 | 3.1647336 | 1.6620841 |
| Gm5617  | chr9  | 48495345  | 48495964  | ENSMUSG00              | 3.171783  | 1.665294  |

|               |       |           |           |                        |           |           |
|---------------|-------|-----------|-----------|------------------------|-----------|-----------|
|               |       |           |           | 000042293              |           |           |
| Tmem17        | chr11 | 22512088  | 22519234  | ENSMUSG00<br>000049904 | 3.187908  | 1.6726099 |
| Fam203a       | chr15 | 76368898  | 76371403  | ENSMUSG00<br>000022554 | 3.1952262 | 1.6759181 |
| Leprel1       | chr16 | 25959288  | 26105784  | ENSMUSG00<br>000038168 | 3.1967504 | 1.676606  |
| Tsen15        | chr1  | 152370735 | 152386688 | ENSMUSG00<br>000014980 | 3.2085881 | 1.6819386 |
| 3010026009Rik | chr11 | 50174444  | 50200115  | ENSMUSG00<br>000020381 | 3.2098417 | 1.6825022 |
| 0610009L18Rik | chr11 | 120348678 | 120351190 | ENSMUSG00<br>000043644 | 3.2153773 | 1.684988  |
| Pigr          | chr1  | 130826684 | 130852249 | ENSMUSG00<br>000026417 | 3.2234526 | 1.6886067 |
| Hpgd          | chr8  | 56294552  | 56321046  | ENSMUSG00<br>000031613 | 3.2313216 | 1.6921244 |
| Cybrd1        | chr2  | 71117923  | 71142926  | ENSMUSG00<br>000027015 | 3.2333074 | 1.6930107 |
| Cdhr2         | chr13 | 54701461  | 54736662  | ENSMUSG00<br>000034918 | 3.243011  | 1.6973339 |
| Nme4          | chr17 | 26091734  | 26095508  | ENSMUSG00<br>000024177 | 3.2506838 | 1.7007432 |
| Slco2b1       | chr7  | 99657804  | 99711340  | ENSMUSG00<br>000030737 | 3.2519855 | 1.7013209 |
| Nek3          | chr8  | 22128283  | 22166435  | ENSMUSG00<br>000031478 | 3.281876  | 1.7145208 |
| Micalcl       | chr7  | 112368308 | 112413104 | ENSMUSG00<br>000030771 | 3.2825818 | 1.714831  |
| Gm10801       | chr2  | 98662237  | 98664083  | ENSMUSG00<br>000075015 | 3.2833257 | 1.7151579 |
| Rnd2          | chr11 | 101464999 | 101471853 | ENSMUSG00<br>000001313 | 3.291238  | 1.7186304 |
| Adrb1         | chr19 | 56722372  | 56724862  | ENSMUSG00<br>000035283 | 3.301095  | 1.7229446 |
| Maob          | chrX  | 16709282  | 16817366  | ENSMUSG00<br>000040147 | 3.3034053 | 1.723954  |
| Solh          | chr17 | 25959556  | 25985680  | ENSMUSG00<br>000037326 | 3.303959  | 1.7241957 |
| Rph3al        | chr11 | 75830999  | 75938429  | ENSMUSG00<br>000020847 | 3.3145878 | 1.7288295 |
| Cav1          | chr6  | 17306335  | 17341452  | ENSMUSG00<br>000007655 | 3.3257217 | 1.7336675 |
| Pam16         | chr16 | 4616464   | 4624988   | ENSMUSG00<br>000014301 | 3.3276474 | 1.7345026 |
| Gsta2         | chr9  | 78331018  | 78355788  | ENSMUSG00<br>000057933 | 3.3353586 | 1.7378418 |
| Rhbdd2        | chr5  | 135632618 | 135646448 | ENSMUSG00<br>000039917 | 3.3356705 | 1.7379768 |
| 2310030G06Rik | chr9  | 50739691  | 50746521  | ENSMUSG00<br>000032062 | 3.3465362 | 1.7426686 |
| Aqp4          | chr18 | 15389394  | 15403684  | ENSMUSG00<br>000024411 | 3.3672428 | 1.7515677 |
| Lilra5        | chr7  | 4237754   | 4243463   | ENSMUSG00<br>000070873 | 3.368185  | 1.7519714 |
| Kcne2         | chr16 | 92292389  | 92298129  | ENSMUSG00<br>000039672 | 3.3705223 | 1.7529721 |
| Igfbp7        | chr5  | 77349240  | 77408045  | ENSMUSG00<br>000036256 | 3.3789656 | 1.7565817 |

|               |       |           |           |                        |           |           |
|---------------|-------|-----------|-----------|------------------------|-----------|-----------|
| Gm20441       | chr10 | 75771451  | 75780954  | ENSMUSG00<br>000092360 | 3.3801873 | 1.7571032 |
| Aldh1l1       | chr6  | 90486427  | 90600203  | ENSMUSG00<br>000030088 | 3.3833075 | 1.7584343 |
| Sdr9c7        | chr10 | 127898518 | 127911761 | ENSMUSG00<br>000040127 | 3.4106793 | 1.7700591 |
| Apoa4         | chr9  | 46240696  | 46243459  | ENSMUSG00<br>000032080 | 3.4137418 | 1.771354  |
| Pde1c         | chr6  | 56069821  | 56369634  | ENSMUSG00<br>000004347 | 3.4301856 | 1.7782866 |
| Btnl4         | chr17 | 34469042  | 34475937  | ENSMUSG00<br>000058435 | 3.4363086 | 1.7808596 |
| Adck3         | chr1  | 180165238 | 180199602 | ENSMUSG00<br>000026489 | 3.4370396 | 1.7811664 |
| Drd3          | chr16 | 43762221  | 43822932  | ENSMUSG00<br>000022705 | 3.4391694 | 1.7820601 |
| Slc43a3       | chr2  | 84936579  | 84958509  | ENSMUSG00<br>000027074 | 3.4443493 | 1.7842314 |
| Cdhr5         | chr7  | 141269085 | 141276786 | ENSMUSG00<br>000025497 | 3.4571576 | 1.7895864 |
| Tspan9        | chr6  | 127961396 | 128143594 | ENSMUSG00<br>000030352 | 3.4614253 | 1.7913662 |
| Ces2b         | chr8  | 104831572 | 104840093 | ENSMUSG00<br>000050097 | 3.4701817 | 1.7950112 |
| Acbd4         | chr11 | 103101682 | 103112200 | ENSMUSG00<br>000056938 | 3.4714696 | 1.7955465 |
| 9130008F23Rik | chr17 | 40875482  | 40880558  | ENSMUSG00<br>000054951 | 3.4960046 | 1.8057071 |
| Cryab         | chr9  | 50752758  | 50756633  | ENSMUSG00<br>000032060 | 3.4972508 | 1.8062212 |
| Ccdc120       | chrX  | 7731714   | 7750905   | ENSMUSG00<br>000031150 | 3.5014753 | 1.8079629 |
| Pdlim4        | chr11 | 54054928  | 54069014  | ENSMUSG00<br>000020388 | 3.5050604 | 1.8094393 |
| Cox7a1        | chr7  | 30184171  | 30186028  | ENSMUSG00<br>000074218 | 3.5381312 | 1.8229876 |
| H2-M2         | chr17 | 37480851  | 37483552  | ENSMUSG00<br>000016283 | 3.5469878 | 1.8265944 |
| Gm572         | chr4  | 148643317 | 148671572 | ENSMUSG00<br>000070577 | 3.561886  | 1.8326414 |
| Tnfaip8l1     | chr17 | 56162477  | 56173955  | ENSMUSG00<br>000044469 | 3.585725  | 1.8422649 |
| Hsd17b6       | chr10 | 127990941 | 128000678 | ENSMUSG00<br>000025396 | 3.5942397 | 1.8456867 |
| Gnb5          | chr9  | 75311395  | 75344964  | ENSMUSG00<br>000032192 | 3.5955148 | 1.8461983 |
| Glod5         | chrX  | 8004200   | 8018492   | ENSMUSG00<br>000031163 | 3.6083143 | 1.851325  |
| Ly6d          | chr15 | 74762056  | 74763567  | ENSMUSG00<br>000034634 | 3.6212907 | 1.856504  |
| Itih2         | chr2  | 10094593  | 10131396  | ENSMUSG00<br>000037254 | 3.6292732 | 1.8596807 |
| Hepacam2      | chr6  | 3457096   | 3494498   | ENSMUSG00<br>000044156 | 3.6427877 | 1.8650429 |
| Pou2f3        | chr9  | 43122628  | 43210369  | ENSMUSG00<br>000032015 | 3.717688  | 1.8944057 |
| Slc29a2       | chr19 | 5024006   | 5031971   | ENSMUSG00<br>000024891 | 3.7184343 | 1.8946953 |
| Trim50        | chr5  | 135353295 | 135368005 | ENSMUSG00              | 3.7195628 | 1.895133  |

|          |       |           |           |                        |           |           |
|----------|-------|-----------|-----------|------------------------|-----------|-----------|
|          |       |           |           | 000053388              |           |           |
| Igdcc4   | chr9  | 65101486  | 65137940  | ENSMUSG00<br>000032816 | 3.7668204 | 1.9133472 |
| Lag3     | chr6  | 124904361 | 124911705 | ENSMUSG00<br>000030124 | 3.766973  | 1.9134057 |
| Gpx7     | chr4  | 108400390 | 108406961 | ENSMUSG00<br>000028597 | 3.7896752 | 1.9220742 |
| Fam73b   | chr2  | 30364233  | 30385521  | ENSMUSG00<br>000026858 | 3.79093   | 1.9225519 |
| Msrb2    | chr2  | 19371440  | 19394976  | ENSMUSG00<br>000023094 | 3.7991068 | 1.9256603 |
| Sec14l4  | chr11 | 4031462   | 4048024   | ENSMUSG00<br>000019368 | 3.833934  | 1.9388255 |
| Cdc42ep2 | chr19 | 5917556   | 5924816   | ENSMUSG00<br>000045664 | 3.8377218 | 1.9402502 |
| Lysmd2   | chr9  | 75625732  | 75637773  | ENSMUSG00<br>000032184 | 3.8406963 | 1.9413679 |
| Ccdc68   | chr18 | 69925426  | 69969484  | ENSMUSG00<br>000038903 | 3.846328  | 1.9434818 |
| Lrrc26   | chr2  | 25289915  | 25291180  | ENSMUSG00<br>000026961 | 3.8475006 | 1.9439216 |
| Ces2a    | chr8  | 104734003 | 104741634 | ENSMUSG00<br>000055730 | 3.8515108 | 1.9454244 |
| Cd59a    | chr2  | 104095801 | 104115354 | ENSMUSG00<br>000032679 | 3.8647196 | 1.9503638 |
| Rgs13    | chr1  | 144138667 | 144177372 | ENSMUSG00<br>000051079 | 3.8832393 | 1.9572606 |
| Gm5113   | chr7  | 30169875  | 30180209  | ENSMUSG00<br>000066647 | 3.9002721 | 1.9635748 |
| Ccl5     | chr11 | 83525778  | 83530518  | ENSMUSG00<br>000035042 | 3.9033666 | 1.9647189 |
| Gstm7    | chr3  | 107926334 | 107931817 | ENSMUSG00<br>000004035 | 3.9148386 | 1.9689528 |
| Tcea3    | chr4  | 136247729 | 136274898 | ENSMUSG00<br>000001604 | 3.9153244 | 1.9691318 |
| St8sia6  | chr2  | 13651020  | 13793808  | ENSMUSG00<br>000003418 | 3.9210846 | 1.9712528 |
| Ly6g6e   | chr17 | 35076902  | 35078804  | ENSMUSG00<br>000013766 | 3.953916  | 1.9832822 |
| Fabp12   | chr3  | 10244209  | 10301183  | ENSMUSG00<br>000027530 | 3.9582937 | 1.9848787 |
| Lum      | chr10 | 97565501  | 97572703  | ENSMUSG00<br>000036446 | 3.9642768 | 1.9870577 |
| Hbb-b2   | chr7  | 103812524 | 103813996 | ENSMUSG00<br>000073940 | 3.9687467 | 1.9886835 |
| Slurp1   | chr15 | 74726644  | 74728026  | ENSMUSG00<br>000022596 | 3.970477  | 1.9893124 |
| Sectm1a  | chr11 | 121067407 | 121081220 | ENSMUSG00<br>000025165 | 3.9731205 | 1.9902725 |
| Bpifb1   | chr2  | 154190818 | 154220369 | ENSMUSG00<br>000027485 | 3.97785   | 1.9919889 |
| Glt28d2  | chr3  | 85801047  | 85887518  | ENSMUSG00<br>000031286 | 3.993803  | 1.9977632 |
| Igfbp2   | chr1  | 72824503  | 72852474  | ENSMUSG00<br>000039323 | 3.9989915 | 1.9996362 |
| Cdkn2b   | chr4  | 89306289  | 89311032  | ENSMUSG00<br>000073802 | 4.02523   | 2.009071  |
| Nr0b2    | chr4  | 133553376 | 133556536 | ENSMUSG00<br>000037583 | 4.036594  | 2.0131385 |

|               |       |           |           |                        |           |           |
|---------------|-------|-----------|-----------|------------------------|-----------|-----------|
| Igfbp6        | chr15 | 102144362 | 102149511 | ENSMUSG00<br>000023046 | 4.039914  | 2.0143247 |
| Anxa13        | chr15 | 58341874  | 58364148  | ENSMUSG00<br>000055114 | 4.0500684 | 2.0179462 |
| Lypd8         | chr11 | 58379043  | 58390728  | ENSMUSG00<br>000013643 | 4.066501  | 2.023788  |
| Cadm1         | chr9  | 47530173  | 47857637  | ENSMUSG00<br>000032076 | 4.067641  | 2.0241923 |
| Mcat          | chr15 | 83546797  | 83555711  | ENSMUSG00<br>000048755 | 4.0760407 | 2.0271685 |
| Dgcr6         | chr16 | 18052860  | 18071632  | ENSMUSG00<br>000003531 | 4.092374  | 2.032938  |
| Rab4a         | chr8  | 123805985 | 123835287 | ENSMUSG00<br>000019478 | 4.1028824 | 2.0366378 |
| Cyp2d37-ps    | chr15 | 82689134  | 82690499  | ENSMUSG00<br>000075517 | 4.105463  | 2.037545  |
| Guca1a        | chr17 | 47394560  | 47400584  | ENSMUSG00<br>000023982 | 4.1240244 | 2.0440528 |
| S100a2        | chr3  | 90590247  | 90591508  | ENSMUSG00<br>000094018 | 4.1273084 | 2.0452013 |
| Clec4b1       | chr6  | 123049962 | 123071555 | ENSMUSG00<br>000030147 | 4.1554456 | 2.0550032 |
| 2200002J24Rik | chr7  | 30699783  | 30700380  | ENSMUSG00<br>000013083 | 4.16377   | 2.0578904 |
| Trib2         | chr12 | 15791727  | 15816877  | ENSMUSG00<br>000020601 | 4.1654134 | 2.0584598 |
| Gstm6         | chr3  | 107938847 | 107943749 | ENSMUSG00<br>000068762 | 4.194541  | 2.068513  |
| Tmem237       | chr1  | 59100594  | 59120096  | ENSMUSG00<br>000038079 | 4.2193127 | 2.077008  |
| Ak1           | chr2  | 32621758  | 32646805  | ENSMUSG00<br>000026817 | 4.223053  | 2.0782864 |
| Igfbp5        | chr1  | 72857932  | 72874884  | ENSMUSG00<br>000026185 | 4.2506337 | 2.087678  |
| Sycn          | chr7  | 28540885  | 28542210  | ENSMUSG00<br>000084174 | 4.2516365 | 2.0880182 |
| 1500002C15Rik | chr4  | 155732548 | 155734627 | ENSMUSG00<br>000096221 | 4.279227  | 2.0973501 |
| Plac8l1       | chr18 | 42178675  | 42196709  | ENSMUSG00<br>000059455 | 4.2914343 | 2.10146   |
| Dmbx1         | chr4  | 115914544 | 115939926 | ENSMUSG00<br>000028707 | 4.3050933 | 2.1060445 |
| Ybx2          | chr11 | 69935796  | 69941605  | ENSMUSG00<br>000018554 | 4.3521194 | 2.1217182 |
| D830050J10Rik | chr6  | 115675995 | 115677136 | ENSMUSG00<br>000055396 | 4.4067593 | 2.139718  |
| Npb           | chr11 | 120608477 | 120609093 | ENSMUSG00<br>000044034 | 4.444853  | 2.1521356 |
| Cckar         | chr5  | 53698485  | 53707704  | ENSMUSG00<br>000029193 | 4.4545784 | 2.155289  |
| Npw           | chr17 | 24657330  | 24658425  | ENSMUSG00<br>000071230 | 4.4980216 | 2.1692905 |
| Serinc4       | chr2  | 121439059 | 121456781 | ENSMUSG00<br>000046110 | 4.579005  | 2.195034  |
| Bex2          | chrX  | 136066564 | 136068236 | ENSMUSG00<br>000042750 | 4.5815825 | 2.195846  |
| S1pr1         | chr3  | 115710433 | 115715055 | ENSMUSG00<br>000045092 | 4.598907  | 2.201291  |
| Ctsf          | chr19 | 4855129   | 4860912   | ENSMUSG00              | 4.639814  | 2.214067  |

|               |       |           |           |                        |           |           |
|---------------|-------|-----------|-----------|------------------------|-----------|-----------|
|               |       |           |           | 000083282              |           |           |
| Psap11        | chr5  | 36204021  | 36206568  | ENSMUSG00<br>000043430 | 4.736054  | 2.2436855 |
| Spink4        | chr4  | 40920052  | 40931395  | ENSMUSG00<br>000028415 | 4.7444687 | 2.2462466 |
| Dclk1         | chr3  | 55242526  | 55539064  | ENSMUSG00<br>000027797 | 4.7887535 | 2.2596502 |
| Cyp11a1       | chr9  | 58015013  | 58027020  | ENSMUSG00<br>000032323 | 4.7912874 | 2.2604134 |
| Hamp2         | chr7  | 30922372  | 30924181  | ENSMUSG00<br>000056978 | 4.81746   | 2.2682726 |
| Ccl12         | chr11 | 82101845  | 82103400  | ENSMUSG00<br>000035352 | 4.894734  | 2.2912304 |
| Adh1          | chr3  | 138260991 | 138290698 | ENSMUSG00<br>000074207 | 4.9052105 | 2.294315  |
| 9130204L05Rik | chr3  | 91088137  | 91090805  | ENSMUSG00<br>000091175 | 4.98883   | 2.3187015 |
| Ces2c         | chr8  | 104847068 | 104854483 | ENSMUSG00<br>000061825 | 4.9949765 | 2.320478  |
| Nphs2         | chr1  | 156310727 | 156328035 | ENSMUSG00<br>000026602 | 5.000123  | 2.3219635 |
| Krt20         | chr11 | 99428403  | 99438150  | ENSMUSG00<br>000035775 | 5.0167727 | 2.3267596 |
| Gm10800       | chr2  | 98666547  | 98667301  | ENSMUSG00<br>000075014 | 5.182784  | 2.3737273 |
| Slco2a1       | chr9  | 103008489 | 103087849 | ENSMUSG00<br>000032548 | 5.1876683 | 2.3750863 |
| AI427809      | chr4  | 53261893  | 53262547  | ENSMUSG00<br>000073854 | 5.209899  | 2.3812554 |
| Trpm5         | chr7  | 143069153 | 143094642 | ENSMUSG00<br>000009246 | 5.2257876 | 2.3856485 |
| Ppcs          | chr4  | 119418530 | 119422420 | ENSMUSG00<br>000028636 | 5.248922  | 2.3920212 |
| Rnase1        | chr14 | 51145002  | 51146767  | ENSMUSG00<br>000035896 | 5.3173976 | 2.4107203 |
| Ifi2712b      | chr12 | 103450898 | 103457223 | ENSMUSG00<br>000021208 | 5.381625  | 2.428042  |
| Mcpt4         | chr14 | 56059744  | 56062310  | ENSMUSG00<br>000061068 | 5.4142556 | 2.436763  |
| Tnfrsf9       | chr4  | 150914562 | 150946102 | ENSMUSG00<br>000028965 | 5.743245  | 2.521866  |
| Mylpf         | chr7  | 127211608 | 127214298 | ENSMUSG00<br>000030672 | 5.783741  | 2.532003  |
| Fhl1          | chrX  | 56731787  | 56793346  | ENSMUSG00<br>000023092 | 5.830895  | 2.5437174 |
| Cyp2b10       | chr7  | 25897620  | 25926624  | ENSMUSG00<br>000030483 | 5.9346585 | 2.569165  |
| Ttc9          | chr12 | 81631369  | 81664941  | ENSMUSG00<br>000042734 | 5.954223  | 2.5739133 |
| Cst11         | chr2  | 148768609 | 148771497 | ENSMUSG00<br>000036958 | 6.2189255 | 2.6366653 |
| Ly6c1         | chr15 | 75045017  | 75048837  | ENSMUSG00<br>000079018 | 6.2448854 | 2.6426752 |
| Cd5l          | chr3  | 87357881  | 87371074  | ENSMUSG00<br>000015854 | 6.264172  | 2.6471238 |
| Ces1f         | chr8  | 93256236  | 93279747  | ENSMUSG00<br>000031725 | 6.267247  | 2.647832  |
| Hbb-b1        | chr7  | 103826534 | 103828096 | ENSMUSG00<br>000052305 | 6.4512215 | 2.6895723 |

|         |       |           |           |                        |           |           |
|---------|-------|-----------|-----------|------------------------|-----------|-----------|
| Cst8    | chr2  | 148798785 | 148805595 | ENSMUSG00<br>000027442 | 6.5387793 | 2.7090213 |
| Gnat3   | chr5  | 17962621  | 18019834  | ENSMUSG00<br>000028777 | 6.705918  | 2.7454348 |
| Mcpt1   | chr14 | 56017964  | 56020391  | ENSMUSG00<br>000022227 | 6.748711  | 2.754612  |
| Spib    | chr7  | 44525995  | 44532071  | ENSMUSG00<br>000008193 | 7.072227  | 2.8221645 |
| Ctla2b  | chr13 | 60895351  | 60897447  | ENSMUSG00<br>000074874 | 7.276787  | 2.8633015 |
| Dcn     | chr10 | 97479500  | 97518162  | ENSMUSG00<br>000019929 | 7.502781  | 2.9074254 |
| Shisa4  | chr1  | 135371057 | 135375237 | ENSMUSG00<br>000041889 | 7.6962957 | 2.9441643 |
| Cd4     | chr6  | 124864692 | 124888221 | ENSMUSG00<br>000023274 | 7.8063455 | 2.9646473 |
| Ch25h   | chr19 | 34473786  | 34475135  | ENSMUSG00<br>000050370 | 8.165212  | 3.0294902 |
| Fcer1a  | chr1  | 173221271 | 173227229 | ENSMUSG00<br>000005339 | 9.201936  | 3.2019374 |
| Hsd17b2 | chr8  | 117701946 | 117759029 | ENSMUSG00<br>000031844 | 9.335035  | 3.2226555 |
| Sectm1b | chr11 | 121053458 | 121063569 | ENSMUSG00<br>000039364 | 9.699     | 3.277836  |
| S100g   | chrX  | 162961992 | 162964599 | ENSMUSG00<br>000040808 | 9.733576  | 3.28297   |
| Cma1    | chr14 | 55941453  | 55944661  | ENSMUSG00<br>000022225 | 10.748507 | 3.4260643 |
| Tpsab1  | chr17 | 25343245  | 25345562  | ENSMUSG00<br>000024173 | 10.916861 | 3.448486  |
| Sh2d6   | chr6  | 72513644  | 72521634  | ENSMUSG00<br>000052631 | 11.700481 | 3.548496  |
| Mcpt2   | chr14 | 56042123  | 56044634  | ENSMUSG00<br>000022226 | 12.481363 | 3.6417036 |
| Tpsb2   | chr17 | 25366550  | 25368094  | ENSMUSG00<br>000033825 | 13.688779 | 3.774922  |
| Cpa3    | chr3  | 20215617  | 20242181  | ENSMUSG00<br>000001865 | 15.242483 | 3.930026  |
| Cym     | chr3  | 107211293 | 107221732 | ENSMUSG00<br>000046213 | 35.08152  | 5.1326394 |
